# Supplementary material for: Nickel-catalyzed C3-alkylation of indoles with alcohols via a borrowing hydrogen strategy
Source: Royal Society of Chemistry journal article supplement (doi:10.1039/d1nj01581h), 2021-01-01
Supplement: d1nj01581h1.pdf [file d1nj01581h1.pdf]

## Supporting Information

### Nickel-Catalyzed C3-Alkylation of Indoles with Alcohols through Borrowing Hydrogen Strategy

Miao Hu<sup>a</sup>, Yong Jiang,<sup>a</sup> Nan Sun,<sup>a</sup> Baoxiang Hu,<sup>a</sup> Zhenlu Shen,<sup>a</sup> Xinquan Hu<sup>a</sup> and  
Liqun Jin<sup>\*a,b</sup>

<sup>a</sup> College of Chemical Engineering, Zhejiang University of Technology, Hangzhou 310032, P. R. China phone: (+86)-571-88320416; e-mail: liqunjin@zjut.edu.cn.

<sup>b</sup> State Key Laboratory for Oxo Synthesis and Selective Oxidation, Lanzhou Institute of Chemical Physics, the Chinese Academy of Sciences, Lanzhou 730000, P. R. China.

## 1. X-ray analysis of Ni1

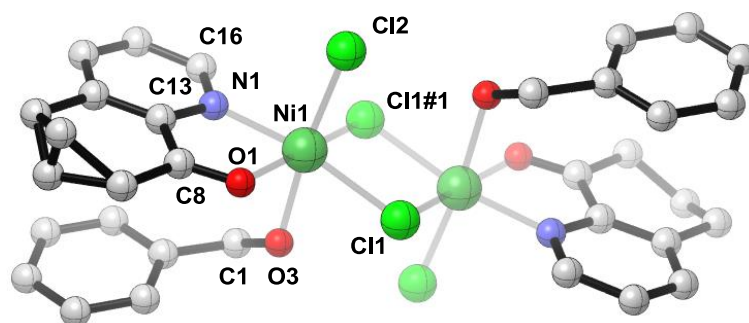

**Figure S1.** Solid structure of Ni1. Hydrogen atoms were emitted for clarity.

**Table S1.** Crystal data and structure refinement for Ni1.

|                                  |                                                                                               |          |
|----------------------------------|-----------------------------------------------------------------------------------------------|----------|
| Identification code              | a                                                                                             |          |
| Empirical formula                | C <sub>32</sub> H <sub>34</sub> Cl <sub>4</sub> N <sub>2</sub> Ni <sub>2</sub> O <sub>4</sub> |          |
| Formula weight                   | 769.83                                                                                        |          |
| Temperature                      | 296.15 K                                                                                      |          |
| Wavelength                       | 0.71073 Å                                                                                     |          |
| Crystal system                   | Orthorhombic                                                                                  |          |
| Space group                      | Pbca                                                                                          |          |
| Unit cell dimensions             | a = 13.0105(6) Å                                                                              | α = 90 ° |
|                                  | b = 11.6307(5) Å                                                                              | β = 90 ° |
|                                  | c = 21.7397(9) Å                                                                              | γ = 90 ° |
| Volume                           | 3289.7(2) Å <sup>3</sup>                                                                      |          |
| Z                                | 4                                                                                             |          |
| Density (calculated)             | 1.554 Mg/m <sup>3</sup>                                                                       |          |
| Absorption coefficient           | 1.509 mm <sup>-1</sup>                                                                        |          |
| F(000)                           | 1584                                                                                          |          |
| Crystal size                     | 0.12 x 0.1 x 0.1 mm <sup>3</sup>                                                              |          |
| Theta range for data collection  | 2.442 to 27.502 °                                                                             |          |
| Index ranges                     | -16 ≤ h ≤ 13, -15 ≤ k ≤ 14, -28 ≤ l ≤ 28                                                      |          |
| Reflections collected            | 26736                                                                                         |          |
| Independent reflections          | 3772 [R(int) = 0.0589]                                                                        |          |
| Completeness to theta = 25.242 ° | 99.9 %                                                                                        |          |
| Absorption correction            | Semi-empirical from equivalents                                                               |          |
| Max. and min. transmission       | 0.7456 and 0.6588                                                                             |          |
| Refinement method                | Full-matrix least-squares on F <sup>2</sup>                                                   |          |

|                                   |                                    |
|-----------------------------------|------------------------------------|
| Data / restraints / parameters    | 3772 / 10 / 212                    |
| Goodness-of-fit on F <sup>2</sup> | 1.033                              |
| Final R indices [I>2sigma(I)]     | R1 = 0.0318, wR2 = 0.0676          |
| R indices (all data)              | R1 = 0.0501, wR2 = 0.0762          |
| Extinction coefficient            | n/a                                |
| Largest diff. peak and hole       | 0.286 and -0.329 e.Å <sup>-3</sup> |

**Table S2.** Bond lengths [Å] and angles [°] for **Ni1**.

| selected bond lengths [Å] |            |                     |            |
|---------------------------|------------|---------------------|------------|
| Ni(1)-Cl(1)               | 2.3738(6)  | O(1)-C(8)           | 1.227(3)   |
| Ni(1)-Cl(2)               | 2.3722(7)  | O(3)-C(1)           | 1.441(3)   |
| Ni(1)-Cl(1)#1             | 2.4019(6)  | N(1)-C(13)          | 1.352(3)   |
| Ni(1)-O(1)                | 2.0879(17) | N(1)-C(16)          | 1.323(3)   |
| Ni(1)-O(3)                | 2.1585(18) | C(8)-C(13)          | 1.472(3)   |
| Ni(1)-N (1)               | 2.0505(19) |                     |            |
| selected angles [°]       |            |                     |            |
| Cl(1)-Ni(1)-Cl(1)#1       | 91.13(2)   | N(1)-Ni(1)-Cl(2)    | 94.50(6)   |
| Cl(2)-Ni(1)-Cl(1)#1       | 92.31(2)   | N(1)-Ni(1)-O(1)     | 79.40(7)   |
| Cl(2)-Ni(1)-Cl(1)         | 92.14(2)   | N(1)-Ni(1)-O(3)     | 91.68(7)   |
| O(1)-Ni(1)-Cl(1)          | 172.99(5)  | Ni(1)-Cl(1)-Ni(1)#1 | 88.87(2)   |
| O(1)-Ni(1)-Cl(1)#1        | 92.54(5)   | C(8)-O(1)-Ni(1)     | 113.48(16) |
| O(1)-Ni(1)-Cl(2)          | 93.68(6)   | Ni(1)-O(3)-H(3)     | 109.5(13)  |
| O(1)-Ni(1)-O(3)           | 88.52(7)   | C(1)-O(3)-Ni(1)     | 122.93(15) |
| O(3)-Ni(1)-Cl(1)          | 86.10(5)   | C(13)-N(1)-Ni(1)    | 112.96(15) |
| O(3)-Ni(1)-Cl(1)#1        | 81.71(5)   | C(16)-N(1)-Ni(1)    | 128.75(17) |
| O(3)-Ni(1)-Cl(2)          | 173.72(5)  | C(16)-N(1)-C(13)    | 118.3(2)   |
| N(1)-Ni(1)-Cl(1)#1        | 169.75(6)  | N(1)-C(13)-C(8)     | 114.34(19) |
| N(1)-Ni(1)-Cl(1)          | 96.25(6)   | O(1)-C(8)-C(13)     | 119.7(2)   |

## 2. Mechanistic experiments

### 2.1 The reaction of indole (1a) with benzyl chloride

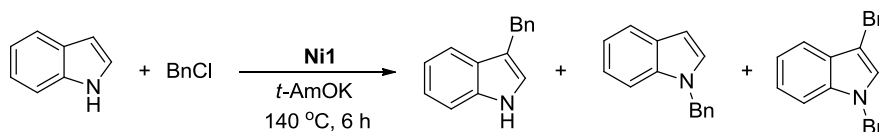

To a Young tube was added **1a** (117 mg, 1 mmol), **Ni1** (0.05 mmol), benzyl chloride (252 mg, 2 mmol) and *t*-AmOK (189 mg, 1.5 mmol). The mixture was stirred at 140 °C for 6 hours. The crude mixture was purified by flash column chromatography on silica gel using PE as the eluent to give the mixture of 3-benzyl-1*H*-indole (10%), 1-benzyl-1*H*-indole(51%) and 1, 3-dibenzyl-1*H*-indole (26%) according to <sup>1</sup>H NMR spectra.

### 2.2 The reaction of indole (1a) with triphenylmethanol

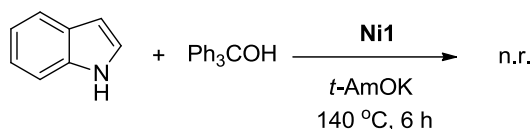

To a Young tube was added **1a** (117 mg, 1 mmol), **Ni1** (0.05 mmol), triphenylmethanol (520 mg, 2 mmol) and *t*-AmOK (189 mg, 1.5 mmol). The mixture was stirred at 140 °C for 6 hours. GC and TLC analysis showed that no reaction occurred.

### 2.3 Kinetic experiments

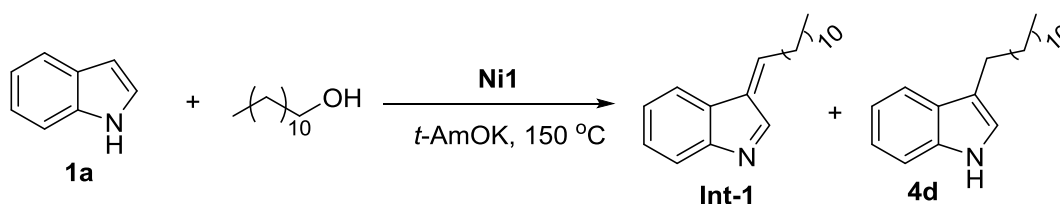

A series of experiments were carried out in order to obtain kinetic data. For example, to a Young tube was added **1a** (35 mg, 0.3 mmol), **Ni1** (0.015 mmol), 1-dodecanol (112 mg, 0.6 mmol) and *t*-AmOK (57 mg, 0.45 mmol). The mixture was stirred at 150 °C for 0.5 hours. GC yield of **1a**, **4d** and **Int-1** were obtained with fluorene as the internal standard as shown in the table below.

**Table S3.** Kinetic data for 1-dodecanol and **Int-1**.

| Entry | Time/h | <b>1a</b> | 1-dodecanol | <b>Int-1</b> |
|-------|--------|-----------|-------------|--------------|
| 1     | 0      | 0.3       | 0           | 0            |
| 2     | 0.5    | 2.723     | 0.039       | 0.050        |
| 3     | 1.0    | 1.993     | 0.044       | 0.061        |
| 4     | 1.5    | 1.127     | 0.071       | 0.094        |
| 5     | 2.0    | 0.467     | 0.096       | 0.118        |
| 6     | 3.0    | 0.247     | 0.144       | 0.157        |
| 7     | 4.0    | 0.043     | 0.152       | 0.131        |
| 8     | 6.0    | 0.003     | 0.192       | 0.102        |
| 9     | 8.0    | 0.003     | 0.215       | 0.081        |
| 10    | 10.0   | 0.003     | 0.255       | 0.051        |
| 11    | 13.0   | 0.003     | 0.261       | 0.034        |

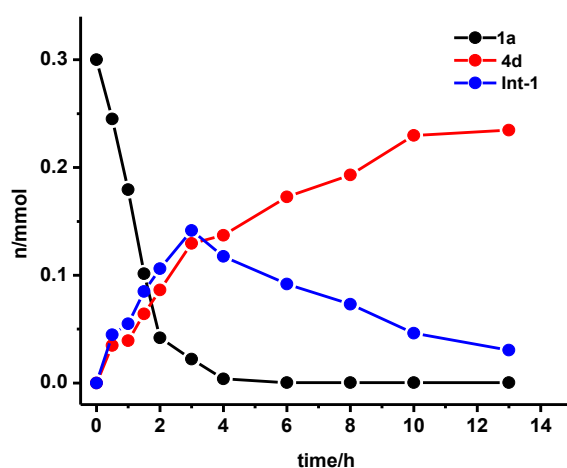

**Figure S2.** Kinetic diagram.

#### 2.4 The competitive reaction of indole (**1a**) with benzaldehyde and (4-methoxyphenyl)methanol (**2e**)

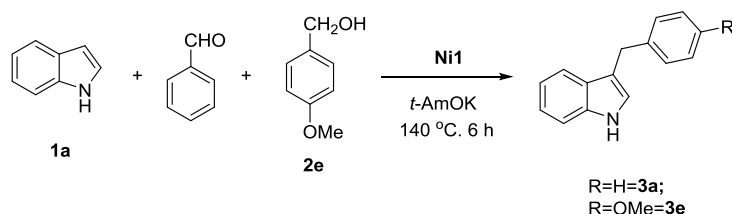

To a Young tube was added **1a** (117 mg, 1 mmol), **Ni1** (0.05 mmol), benzaldehyde (106 mg, 1 mmol), **2e** (272 mg, 2 mmol) and *t*-AmOK (189 mg, 1.5 mmol). The mixture was stirred at 140 °C for 6 hours. 48% GC yield of **3a** and 35% GC yield of **3e** were

obtained with fluorene as the internal standard.

## 2.5 The reduction of intermediate **5** by benzyl alcohol

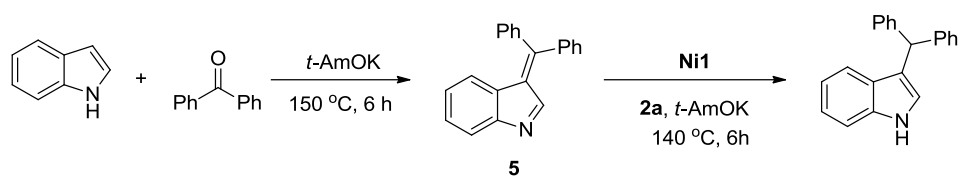

To a Young tube was added **1a** (117 mg, 1 mmol), benzophenone (364 mg, 2 mmol) and *t*-AmOK (189 mg, 1.5 mmol). The mixture was stirred at 140 °C for 6 hours. The crude mixture was purified by flash column chromatography on silica gel using PE and EA as the eluent to give 222 mg of **5** (79% yield).

To a Young tube was added **5** (141 mg, 0.5 mmol), **2a** (108 mg, 1 mmol) and *t*-AmOK (95 mg, 1.5 mmol). The mixture was stirred at 140 °C for 6 hours. The crude mixture was purified by flash column chromatography on silica gel using PE and EA as the eluent to give 249 mg of **3m** (88% yield).

### 3. NMR of all products

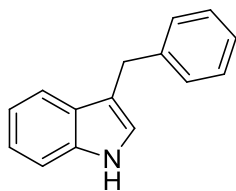

**3-benzyl-1H-indole (3a)**<sup>[1]</sup>: <sup>1</sup>H NMR (500 MHz, CDCl<sub>3</sub>) δ 7.91 (br. s, 1H), 7.56 (d, *J* = 7.9 Hz, 1H), 7.37 (d, *J* = 8.1 Hz, 1H), 7.35-7.27 (m, 4H), 7.25-7.18 (m, 2H), 7.11 (t, *J* = 7.5 Hz, 1H), 6.91 (s, 1H), 4.15 (s, 2H). <sup>13</sup>C NMR (125 MHz, CDCl<sub>3</sub>) δ 141.3, 136.6, 128.8, 128.5, 127.6, 126.0, 122.5, 122.2, 119.5, 119.3, 116.0, 111.2, 31.7.

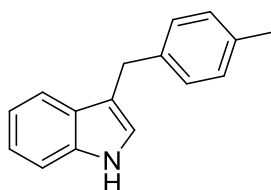

**3-(4-methylbenzyl)-1H-indole (3b)**<sup>[1]</sup>: <sup>1</sup>H NMR (500 MHz, CDCl<sub>3</sub>) δ 7.90 (br. s, 1H), 7.56 (d, *J* = 7.9 Hz, 1H), 7.36 (d, *J* = 8.1 Hz, 1H), 7.24-7.18 (m, 3H), 7.11-7.08 (m, 3H), 6.91 (s, 1H), 4.11 (s, 2H), 2.35 (s, 3H). <sup>13</sup>C NMR (125 MHz, CDCl<sub>3</sub>) δ 138.3, 136.6, 135.4, 129.1, 128.7, 127.6, 122.4, 122.1, 119.4, 116.2, 111.2, 31.3, 21.1.

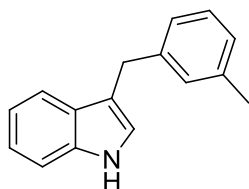

**3-(3-methylbenzyl)-1H-indole (3c)**<sup>[1]</sup>: <sup>1</sup>H NMR (500 MHz, CDCl<sub>3</sub>) δ 7.88 (br. s, 1H), 7.59 (d, *J* = 7.9 Hz, 1H), 7.37 (d, *J* = 8.1 Hz, 1H), 7.25-7.19 (m, 2H), 7.17-7.10 (m, 3H), 7.06 (d, *J* = 7.4 Hz, 1H), 6.91 (s, 1H), 4.12 (s, 2H), 2.35 (s, 3H). <sup>13</sup>C NMR (125 MHz, CDCl<sub>3</sub>) δ 141.3, 138.0, 136.5, 129.6, 128.2, 127.6, 126.8, 125.9, 122.4, 122.1, 119.4, 119.3, 116.1, 111.2, 31.6, 21.6.

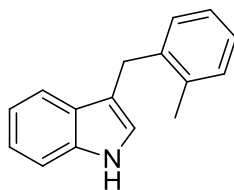

**3-(2-methylbenzyl)-1H-indole (3d)**<sup>[1]</sup>: <sup>1</sup>H NMR (500 MHz, CDCl<sub>3</sub>) δ 7.92 (br. s, 1H), 7.58 (d, *J* = 7.9 Hz, 1H), 7.37 (d, *J* = 8.1 Hz, 1H), 7.23-7.09 (m, 6H), 6.73 (s, 1H),

4.08 (s, 2H), 2.34 (s, 3H).  $^{13}\text{C}$  NMR (125 MHz,  $\text{CDCl}_3$ )  $\delta$  139.2, 136.6, 130.2, 129.5, 127.7, 126.3, 126.1, 122.5, 122.2, 119.5, 119.2, 115.4, 111.2, 29.4, 19.6.

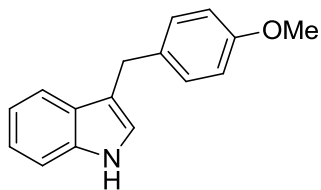

**3-(4-methoxybenzyl)-1H-indole (3e)**<sup>[1]</sup>  $^1\text{H}$  NMR (500 MHz,  $\text{CDCl}_3$ )  $\delta$  7.94 (br. s, 1H), 7.53 (d,  $J = 7.9$  Hz, 1H), 7.36 (d,  $J = 8.1$  Hz, 1H), 7.23-7.17 (m, 3H), 7.11-7.06 (m, 1H), 6.90 (s, 1H), 6.83 (d,  $J = 8.6$  Hz, 2H), 4.07 (s, 2H), 3.79 (s, 3H).  $^{13}\text{C}$  NMR (125 MHz,  $\text{CDCl}_3$ )  $\delta$  157.9, 136.6, 133.4, 129.7, 127.6, 122.3, 122.1, 119.4, 119.3, 116.4, 113.9, 111.2, 55.4, 30.8.

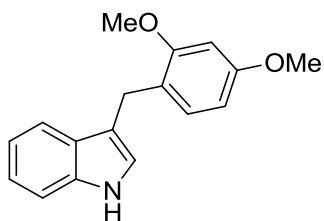

**3-(2,4-dimethoxybenzyl)-1H-indole (3f)**<sup>[2]</sup>  $^1\text{H}$  NMR (600 MHz,  $\text{CDCl}_3$ )  $\delta$  7.89 (br. s, 1H), 7.62 (d,  $J = 7.9$  Hz, 1H), 7.34 (d,  $J = 8.1$  Hz, 1H), 7.22-7.17 (m, 1H), 7.16-7.10 (m, 1H), 7.04 (d,  $J = 8.3$  Hz, 1H), 6.91 (s, 1H), 6.51 (d,  $J = 2.1$  Hz, 1H), 6.38 (dd,  $J = 8.3, 2.1$  Hz, 1H), 4.07 (s, 2H), 3.87 (s, 3H), 3.81 (s, 3H).  $^{13}\text{C}$  NMR (125 MHz,  $\text{CDCl}_3$ )  $\delta$  159.3, 158.2, 136.5, 130.2, 127.8, 122.4, 122.2, 121.9, 119.4, 119.3, 115.8, 111.1, 104.0, 98.6, 55.5, 55.5, 24.6.

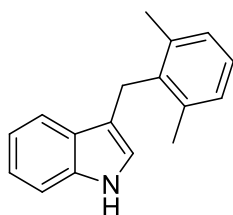

**3-(2,6-dimethylbenzyl)-1H-indole (3g)**  $^1\text{H}$  NMR (500 MHz,  $\text{CDCl}_3$ )  $\delta$  7.80 (br. s, 1H), 7.71 (d,  $J = 7.8$  Hz, 1H), 7.36 (d,  $J = 8.0$  Hz, 1H), 7.25-7.17 (m, 2H), 7.15-7.08 (m, 3H), 6.40-6.38 (m, 1H), 4.10 (s, 2H), 2.32 (s, 6H).  $^{13}\text{C}$  NMR (125 MHz,  $\text{CDCl}_3$ )  $\delta$  137.5, 137.5, 137.1, 136.7, 128.1, 127.7, 126.1, 122.2, 121.6, 119.4, 118.9, 114.8, 111.2, 25.6, 20.0. HRMS (ESI+): calc. for  $\text{C}_{17}\text{H}_{18}\text{N}$   $[\text{M}+\text{H}]^+$ : 236.1439, found



236.1434.

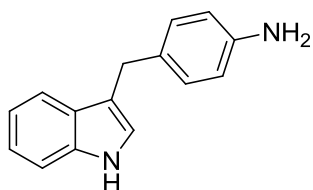

**4-((1*H*-indol-3-yl)methyl)aniline (3h)**<sup>[31]</sup> <sup>1</sup>H NMR (500 MHz, DMSO-*d*<sub>6</sub>) δ 10.77 (br. s, 1H), 7.41 (d, *J*=7.9 Hz, 1H), 7.33 (d, *J*=8.1 Hz, 1H), 7.10-7.02 (m, 2H), 6.96-6.89 (m, 3H), 6.48 (d, *J*=8.4 Hz, 2H), 4.84 (br. s, 2H), 3.86 (s, 2H). <sup>13</sup>C NMR (125 MHz, DMSO-*d*<sub>6</sub>) δ 146.3, 136.4, 128.8, 128.8, 127.1, 122.7, 120.8, 118.7, 118.1, 115.0, 113.9, 111.3, 30.3.

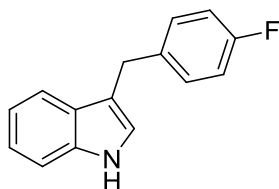

**3-(4-fluorobenzyl)-1*H*-indole (3i)**<sup>[41]</sup> <sup>1</sup>H NMR (600 MHz, CDCl<sub>3</sub>, contains 20% of **2a**) δ 7.87 (br. s, 1H), 7.46 (d, *J* = 7.9 Hz, 1H), 7.32 (d, *J* = 8.2 Hz, 1H), 7.22-7.14 (m, 3H), 7.09-7.03 (m, 1H), 6.96-6.89 (m, 2H), 6.85 (s, 1H), 4.05 (s, 1H). <sup>13</sup>C NMR (150 MHz, CDCl<sub>3</sub>) δ 161.7 (d, *J*=243.3 Hz), 136.9 (d, *J*=2.4 Hz), 136.6, 130.1 (d, *J*=7.7 Hz), 128.6 (d, *J*=45.6 Hz), 127.4, 122.2, 119.5, 119.2, 115.8, 115.1 (d, *J*=21.2 Hz), 111.2, 30.1.

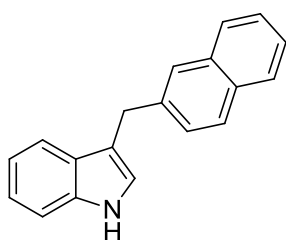

**3-(naphthalen-2-ylmethyl)-1*H*-indole (3j)**<sup>[44]</sup> <sup>1</sup>H NMR (500 MHz, CDCl<sub>3</sub>) δ 7.94 (br. s, 1H), 7.85-7.70 (m, 4H), 7.57 (d, *J* = 7.9 Hz, 1H), 7.51-7.40 (m, 3H), 7.37 (d, *J* = 8.1 Hz, 1H), 7.21 (t, *J* = 7.3 Hz, 1H), 7.09 (t, *J* = 7.3 Hz, 1H), 6.93 (s, 1H), 4.30 (s, 2H). <sup>13</sup>C NMR (125 MHz, CDCl<sub>3</sub>) δ 138.9, 136.6, 133.8, 132.2, 128.0, 127.7, 127.7, 127.6, 126.8, 126.0, 125.3, 122.6, 122.2, 119.6, 119.3, 115.9, 111.2, 32.0.

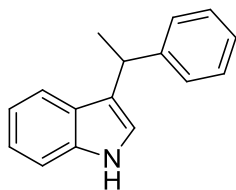

**3-(1-phenylethyl)-1H-indole (3k)**<sup>[1]</sup> <sup>1</sup>H NMR (600 MHz, CDCl<sub>3</sub>) δ 7.91 (br. s, 1H), 7.40 (d, *J* = 7.8 Hz, 1H), 7.37-7.27 (m, 5H), 7.24-7.15 (m, 2H), 7.05-7.00 (m, 2H), 4.40 (q, *J* = 7.1 Hz, 1H), 1.74 (d, *J* = 7.1 Hz, 3H). <sup>13</sup>C NMR (150 MHz, CDCl<sub>3</sub>) δ 146.9, 136.8, 128.4, 127.6, 127.0, 126.0, 122.1, 121.6, 121.2, 119.8, 119.3, 111.1, 37.1, 22.5.

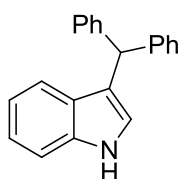

**3-benzhydryl-1H-indole (3l)**<sup>[1]</sup> <sup>1</sup>H NMR (500 MHz, CDCl<sub>3</sub>) δ 7.92 (br. s, 1H), 7.43-7.13 (m, 13H), 7.02 (t, *J* = 7.5 Hz, 1H), 6.58 (s, 1H), 5.70 (s, 1H). <sup>13</sup>C NMR (125 MHz, CDCl<sub>3</sub>) δ 144.1, 136.8, 129.2, 128.4, 127.1, 126.4, 124.2, 122.2, 120.1, 120.1, 119.5, 111.2, 49.0.

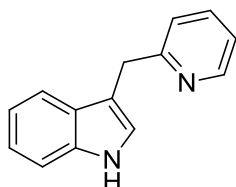

**3-(pyridin-2-ylmethyl)-1H-indole (3m)**<sup>[5]</sup> <sup>1</sup>H NMR (500 MHz, CDCl<sub>3</sub>) δ 8.57 (d, *J* = 4.8, 1H), 8.41 (br. s, 1H), 7.58-7.49 (m, 2H), 7.34 (d, *J* = 8.1 Hz, 1H), 7.21-7.14 (m, 2H), 7.13-7.01 (m, 3H), 4.33 (s, 2H). <sup>13</sup>C NMR (125 MHz, CDCl<sub>3</sub>) δ 161.4, 149.2, 136.6, 136.6, 127.5, 122.9, 122.9, 122.1, 121.2, 119.5, 119.2, 113.8, 111.3, 34.6.

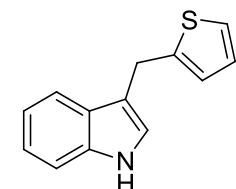

**3-(thiophen-2-ylmethyl)-1H-indole (3n)**<sup>[4]</sup> <sup>1</sup>H NMR (500 MHz, CDCl<sub>3</sub>) δ 7.95 (br. s, 1H), 7.59 (d, *J* = 7.9 Hz, 1H), 7.37 (d, *J* = 8.1 Hz, 1H), 7.24-7.19 (m, 1H), 7.16-7.09 (m, 2H), 7.04 (s, 1H), 6.96-6.88 (m, 2H), 4.33 (s, 2H). <sup>13</sup>C NMR (125 MHz, CDCl<sub>3</sub>) δ

144.8, 136.5, 127.2, 126.8, 124.8, 123.5, 122.4, 122.3, 119.6, 119.2, 115.4, 111.3, 26.1.

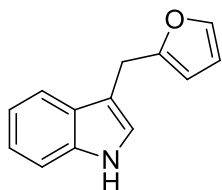

**3-(furan-2-ylmethyl)-1H-indole (3o)**<sup>[4]</sup> <sup>1</sup>H NMR (500 MHz, CDCl<sub>3</sub>) δ 7.95 (br. s, 1H), 7.60 (d, *J* = 8.0 Hz, 1H), 7.38-7.32 (m, 2H), 7.24-7.19 (m, 1H), 7.16-7.10 (m, 1H), 7.05 (s, 1H), 6.31 (dd, *J* = 3.1, 1.0 Hz, 1H), 6.05 (dd, *J* = 3.1, 1.9 Hz, 1H), 4.15 (s, 2H). <sup>13</sup>C NMR (125 MHz, CDCl<sub>3</sub>) δ 155.0, 141.2, 136.4, 127.4, 122.4, 122.2, 119.6, 119.2, 112.7, 111.2, 110.4, 105.8, 24.6.

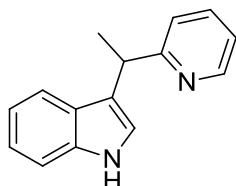

**3-(1-(pyridin-2-yl)ethyl)-1H-indole (3p)** <sup>1</sup>H NMR (500 MHz, CDCl<sub>3</sub>) δ 8.58 (d, *J* = 4.8 Hz, 1H), 8.50 (br. s, 1H), 7.56-7.49 (m, 1H), 7.40 (d, *J* = 8.0 Hz, 1H), 7.32 (d, *J* = 8.0 Hz, 1H), 7.19-7.13 (m, 2H), 7.11-7.05 (m, 2H), 7.05-6.98 (m, 1H), 4.57 (q, *J* = 7.2 Hz, 1H), 1.78 (d, *J* = 7.2 Hz, 3H). <sup>13</sup>C NMR (125 MHz, CDCl<sub>3</sub>) δ 165.9, 149.0, 136.8, 136.7, 127.0, 122.0, 121.9, 121.5, 121.3, 119.9, 119.6, 119.3, 111.2, 39.6, 21.0.

HRMS (ESI<sup>+</sup>): calc. for C<sub>15</sub>H<sub>15</sub>N<sub>2</sub>[M+H]<sup>+</sup>:223.1235, found 223.1230.

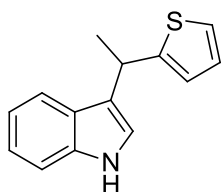

**3-(1-(thiophen-2-yl)ethyl)-1H-indole (3q)**<sup>[6]</sup> <sup>1</sup>H NMR (600 MHz, CDCl<sub>3</sub>) δ 7.94 (s, 1H), 7.53 (d, *J* = 8.0 Hz, 1H), 7.36 (d, *J* = 8.1 Hz, 1H), 7.22-7.17 (m, 1H), 7.13 (dd, *J* = 5.0, 1.1 Hz, 1H), 7.10-7.06 (m, 1H), 7.04 (d, *J* = 1.9 Hz, 1H), 6.93-6.87 (m, 2H), 4.68 (q, *J* = 7.1 Hz, 1H), 1.82 (d, *J* = 7.1 Hz, 3H). <sup>13</sup>C NMR (125 MHz, CDCl<sub>3</sub>) δ 151.5, 136.6, 126.6, 126.6, 123.5, 123.1, 122.2, 121.5, 121.1, 119.6, 119.5, 111.3, 32.5, 23.5.

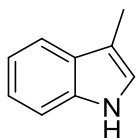

**3-methyl-1H-indole (4a)**<sup>[71]</sup> <sup>1</sup>H NMR (600 MHz, CDCl<sub>3</sub>) δ 7.82 (br. s, 1H), 7.64 (d, *J* = 7.9 Hz, 1H), 7.37 (d, *J* = 8.1 Hz, 1H), 7.27-7.22 (m, 1H), 7.18 (t, *J* = 7.4 Hz, 1H), 6.98 (s, 1H), 2.39 (s, 1H). <sup>13</sup>C NMR (150 MHz, CDCl<sub>3</sub>) 136.4, 128.4, 122.0, 121.7, 119.2, 118.9, 111.8, 111.1, 9.8.

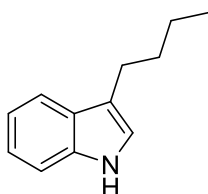

**3-butyl-1H-indole (4b)**<sup>[81]</sup> <sup>1</sup>H NMR (600 MHz, CDCl<sub>3</sub>) δ 7.86 (br. s, 1H), 7.69 (d, *J* = 7.8 Hz, 1H), 7.39 (d, *J* = 8.1 Hz, 1H), 7.29-7.16 (m, 2H), 7.00 (s, 1H), 2.83 (t, *J* = 7.6 Hz, 2H), 1.85-1.72 (m, 2H), 1.56-1.44 (m, 2H), 1.03 (t, *J* = 7.4 Hz, 3H). <sup>13</sup>C NMR (125 MHz, CDCl<sub>3</sub>) δ 136.5, 127.9, 121.9, 121.1, 119.2, 117.3, 111.2, 32.5, 25.0, 22.8, 14.1.

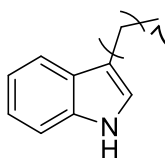

**3-octyl-1H-indole (4c)**<sup>[81]</sup> <sup>1</sup>H NMR (500 MHz, CDCl<sub>3</sub>) δ 7.86 (br. s, 1H), 7.64 (d, *J* = 7.8 Hz, 1H), 7.36 (d, *J* = 8.1 Hz, 1H), 7.24-7.11 (m, 2H), 6.97 (s, 1H), 2.78 (t, *J* = 7.6 Hz, 2H), 1.78-1.70 (m, 2H), 1.48-1.24 (m, 10H), 0.92 (t, *J* = 6.9 Hz, 3H). <sup>13</sup>C NMR (125 MHz, CDCl<sub>3</sub>) δ 136.5, 127.8, 121.9, 121.1, 119.2, 117.4, 111.1, 32.1, 30.3, 29.8, 29.7, 29.5, 25.3, 22.8, 14.3.

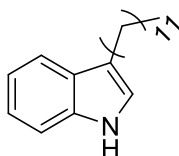

**3-dodecyl-1H-indole (4d)** <sup>1</sup>H NMR (500 MHz, CDCl<sub>3</sub>) δ 7.88 (br. s, 1H), 7.63 (d, *J* = 7.9 Hz, 1H), 7.36 (d, *J* = 8.1 Hz, 1H), 7.22-7.17 (m, 1H), 7.16-7.09 (m, 1H), 6.97 (s, 1H), 2.76 (t, *J* = 7.5 Hz, 2H), 1.77-1.66 (m, 2H), 1.46-1.19 (m, 18H), 0.90 (t, *J* = 7.0 Hz, 3H). <sup>13</sup>C NMR (125 MHz, CDCl<sub>3</sub>) δ 136.5, 127.8, 121.9, 121.1, 119.2, 117.4,

111.1, 32.1, 30.3, 29.9, 29.8, 29.8, 29.7, 29.5, 25.3, 22.8, 14.3. HRMS (ESI+): calc. for C<sub>20</sub>H<sub>32</sub>N [M+H]<sup>+</sup>:286.2535, found 286.2529.

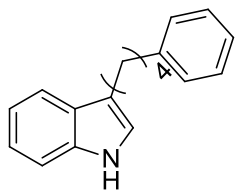

**3-Phenylbutyl-1H-indole (4e)** <sup>1</sup>H NMR (600 MHz, CDCl<sub>3</sub>) δ 7.85 (br. s, 1H), 7.64 (d, *J* = 7.9 Hz, 1H), 7.37 (d, *J* = 8.1 Hz, 1H), 7.31 (t, *J* = 7.5 Hz, 2H), 7.25-7.19 (m, 4H), 7.15 (t, *J* = 7.5 Hz, 1H), 6.95 (s, 1H), 2.83 (t, *J* = 7.1 Hz, 2H), 2.70 (t, *J* = 7.1 Hz, 2H), 1.85-1.72 (m, 4H). <sup>13</sup>C NMR (150 MHz, CDCl<sub>3</sub>) δ 142.9, 136.5, 128.6, 128.4, 127.7, 125.7, 122.0, 121.2, 119.2, 119.1, 117.0, 111.2, 36.0, 31.5, 29.9, 25.1. HRMS (ESI+): calc. for C<sub>18</sub>H<sub>20</sub>N[M+H]<sup>+</sup>:250.1596, found 250.1590.

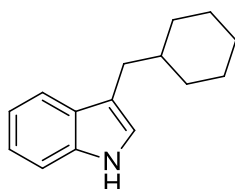

**3-(cyclohexylmethyl)-1H-indole (4f)**<sup>[1]</sup> <sup>1</sup>H NMR (600 MHz, CDCl<sub>3</sub>) δ 7.89 (br. s, 1H), 7.63 (d, *J* = 7.8 Hz, 1H), 7.36 (d, *J* = 8.1 Hz, 1H), 7.22-7.10 (m, 2H), 6.96 (d, *J* = 1.9 Hz, 1H), 2.65 (d, *J* = 7.0 Hz, 2H), 1.82-1.59 (m, 6H), 1.26-1.11 (m, 3H), 1.05-0.96 (m, 2H). <sup>13</sup>C NMR (150 MHz, CDCl<sub>3</sub>) δ 136.4, 128.2, 122.0, 121.8, 119.4, 119.1, 115.6, 111.1, 38.9, 33.7, 33.2, 26.8, 26.5.

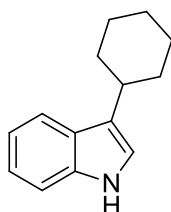

**3-cyclohexyl-1H-indole (4g)**<sup>[1]</sup> <sup>1</sup>H NMR (500 MHz, CDCl<sub>3</sub>) δ 7.84 (br. s, 1H), 7.70 (d, *J* = 7.9 Hz, 1H), 7.36 (d, *J* = 8.1 Hz, 1H), 7.21 (t, *J* = 7.5 Hz, 1H), 7.13 (t, *J* = 7.5 Hz, 1H), 6.95 (s, 1H), 2.91-2.82 (m, 1H), 2.19-2.06 (m, 2H), 1.94-1.76 (m, 3H), 1.57-1.42 (m, 4H), 1.38-1.27 (m, 1H). <sup>13</sup>C NMR (125 MHz, CDCl<sub>3</sub>) δ 136.5, 126.9, 123.4, 121.9, 119.5, 119.1, 111.2, 35.6, 34.2, 27.1, 26.7.

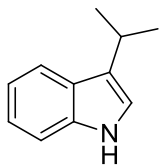

**3-isopropyl-1H-indole (4h)**<sup>[9]</sup> <sup>1</sup>H NMR (400 MHz, CDCl<sub>3</sub>) δ 7.86 (br. s, 1H), 7.69 (d, *J*=7.9 Hz, 1H), 7.36 (d, *J*=8.1 Hz, 1H), 7.24-7.10 (m, 2H), 6.96 (s, 1H), 3.29-3.20 (m, 1H), 1.39 (d, *J*=7.0 Hz, 6H). <sup>13</sup>C NMR (125 MHz, CDCl<sub>3</sub>) δ 136.8, 126.9, 124.2, 122.0, 119.5, 119.4, 119.1, 111.2, 25.6, 23.5.

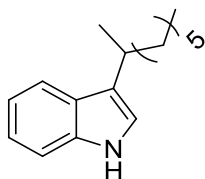

**3-(1-methylheptyl)-1H-indole (4i)**<sup>[11]</sup> <sup>1</sup>H NMR (500 MHz, CDCl<sub>3</sub>) δ 7.87 (br. s, 1H), 7.68 (d, *J*=7.9 Hz, 1H), 7.36 (d, *J*=8.1 Hz, 1H), 7.23-7.11 (m, 2H), 6.95 (d, *J*=2.2 Hz, 1H), 3.10-2.99 (m, 1H), 1.90-1.74 (m, 1H), 1.68-1.59 (m, 1H), 1.37 (d, *J*=6.9 Hz, 3H), 1.33-1.26 (m, 8H), 0.91-0.87 (m, 3H). <sup>13</sup>C NMR (125 MHz, CDCl<sub>3</sub>) δ 136.6, 127.1, 123.0, 121.8, 120.0, 119.6, 119.0, 111.2, 37.8, 32.0, 31.0, 29.7, 27.9, 22.8, 21.6, 14.2.

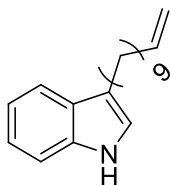

**3-(undec-10-en-1-yl)-1H-indole (4j)** <sup>1</sup>H NMR (500 MHz, CDCl<sub>3</sub>) δ 7.90 (br. s, 1H), 7.63 (d, *J*=7.8 Hz, 1H), 7.35 (d, *J*=8.1 Hz, 1H), 7.19 (t, *J*=7.4 Hz, 1H), 7.12 (t, *J*=7.4 Hz, 1H), 6.97 (s, 1H), 5.88-5.76 (m, 1H), 5.05-4.90 (m, 2H), 2.76 (t, *J*=7.6 Hz, 2H), 2.09-2.00 (m, 2H), 1.76-1.67 (m, 2H), 1.42-1.14 (m, 12H). <sup>13</sup>C NMR (150 MHz, CDCl<sub>3</sub>) δ 139.4, 136.5, 127.8, 121.9, 121.1, 119.2, 119.1, 117.4, 114.2, 111.1, 34.0, 30.3, 29.8, 29.8, 29.7, 29.7, 29.3, 29.1, 25.3. HRMS (ESI<sup>+</sup>): calc. for C<sub>19</sub>H<sub>28</sub>N [M+H]<sup>+</sup>: 270.2222, found 270.2216.

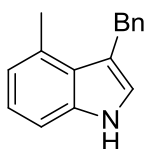

**3-benzyl-4-methyl-1H-indole (5a)**<sup>[11]</sup> <sup>1</sup>H NMR (600 MHz, CDCl<sub>3</sub>) δ 7.81 (br. s, 1H), 7.27-7.11(m, 7H), 6.96 (d, *J*=8.2 Hz, 1H), 6.76 (s, 1H), 4.03 (s, 2H), 2.37 (s, 3H). <sup>13</sup>C NMR (150 MHz, CDCl<sub>3</sub>) 141.5, 134.9, 128.8, 128.7, 128.4, 127.8, 127.7, 125.9, 123.8, 122.6, 118.8, 115.4, 110.9, 31.6, 21.6.

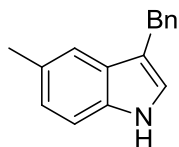

**3-benzyl-5-methyl-1H-indole (5b)**<sup>[11]</sup> <sup>1</sup>H NMR (600 MHz, CDCl<sub>3</sub>) δ 7.82 (br. s, 1H), 7.35 (s, 1H), 7.34-7.39 (m, 4H), 7.28-7.20 (m, 2H), 7.05 (d, *J*=8.2 Hz, 1H), 6.87 (s, 1H), 4.12 (s, 2H), 2.46 (s, 3H). <sup>13</sup>C NMR (150 MHz, CDCl<sub>3</sub>) δ 141.5, 134.9, 128.8, 128.4, 127.8, 126.0, 123.8, 122.6, 118.8, 115.4, 110.9, 31.6, 21.6.

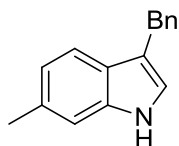

**3-benzyl-6-methyl-1H-indole (5c)**<sup>[51]</sup> <sup>1</sup>H NMR (400 MHz, CDCl<sub>3</sub>) δ 7.80 (br. s, 1H), 7.41 (d, *J*=8.1 Hz, 1H), 7.33-7.26 (m, 4H), 7.23-7.18 (m, 1H), 7.15 (s, 1H), 6.93 (d, *J*=8.1 Hz, 1H), 6.87-6.81 (m, 1H), 4.12 (s, 2H), 2.47 (s, 3H). <sup>13</sup>C NMR (100 MHz, CDCl<sub>3</sub>) δ 141.4, 137.0, 132.0, 128.8, 128.4, 125.9, 125.5, 121.8, 121.2, 118.9, 115.7, 111.2, 31.8, 21.8.

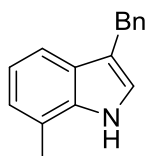

**3-benzyl-7-methyl-1H-indole (5d)**<sup>[101]</sup> <sup>1</sup>H NMR (500 MHz, CDCl<sub>3</sub>) δ 7.86 (br. s, 1H), 7.41 (d, *J*=6.8 Hz 1H), 7.35-7.27 (m, 4H), 7.23-7.18 (m, 1H), 7.07-6.99 (m, 2H), 6.93 (s, 1H), 4.14 (s, 2H), 2.50 (s, 3H). <sup>13</sup>C NMR (125 MHz, CDCl<sub>3</sub>) δ 141.4, 136.2, 128.8, 128.4, 127.1, 126.0, 122.7, 122.2, 120.3, 119.7, 117.0, 116.5, 31.8, 16.7.

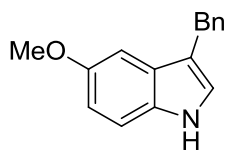

**3-benzyl-5-methoxy-1H-indole (5e)**<sup>[11]</sup> <sup>1</sup>H NMR (600 MHz, CDCl<sub>3</sub>) δ 7.86 (br. s, 1H), 7.37-7.23 (m, 6H), 7.01 (d, *J*=2.4 Hz, 1H), 6.93-6.89 (m, 2H), 4.12 (s, 2H), 3.83 (s,

3H).  $^{13}\text{C}$  NMR (150 MHz,  $\text{CDCl}_3$ )  $\delta$  154.0, 141.3, 131.7, 128.8, 128.5, 128.0, 126.0, 123.3, 115.6, 112.2, 111.9, 101.2, 56.0, 31.7.

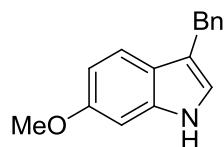

**3-benzyl-6-methoxy-1H-indole (5f)**<sup>[5]</sup>  $^1\text{H}$  NMR (600 MHz,  $\text{CDCl}_3$ )  $\delta$  7.82 (br. s, 1H), 7.39 (d,  $J=8.6$  Hz, 1H), 7.33-7.27 (m, 4H), 7.24-7.19 (m, 1H), 6.84 (d,  $J=2.2$  Hz, 1H), 6.82-6.76 (m, 2H), 4.10 (s, 2H), 3.85 (s, 3H).  $^{13}\text{C}$  NMR (150 MHz,  $\text{CDCl}_3$ )  $\delta$  156.6, 141.4, 137.4, 128.8, 128.4, 126.0, 122.1, 121.2, 119.9, 115.9, 109.4, 94.8, 55.8, 31.8.

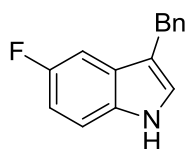

**3-benzyl-5-fluoro-1H-indole (5g)**<sup>[1]</sup>  $^1\text{H}$  NMR (600 MHz,  $\text{CDCl}_3$ )  $\delta$  7.97 (br. s, 1H), 7.33-7.21 (m, 6H), 7.16 (d,  $J=9.1$  Hz, 1H), 6.98 (d,  $J=2.1$  Hz, 1H), 6.95 (td,  $J=9.0$ , 2.2 Hz, 1H), 4.09 (s, 2H).  $^{13}\text{C}$  NMR (150 MHz,  $\text{CDCl}_3$ )  $\delta$  157.8 (d,  $J=234.8$  Hz), 140.9, 133.1, 128.7, 128.5, 127.9 (d,  $J=9.6$  Hz), 126.2, 124.2, 116.1 (d,  $J=4.8$  Hz), 111.8 (d,  $J=9.7$  Hz), 110.5 (d,  $J=26.4$  Hz), 104.2 (d,  $J=23.3$  Hz), 31.7.

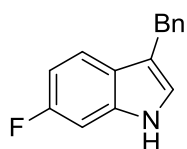

**3-benzyl-6-fluoro-1H-indole (5h)**<sup>[10]</sup>  $^1\text{H}$  NMR (500 MHz,  $\text{CDCl}_3$ , contains 5% of **2a**)  $\delta$  7.97 (br. s, 1H), 7.43-7.37 (m, 1H), 7.30-7.26 (m, 3H), 7.23-7.18 (m, 1H), 7.03 (dd,  $J=9.6$ , 2.2 Hz, 1H), 6.88-6.81 (m, 1H), 4.09 (s, 2H).  $^{13}\text{C}$  NMR (125 MHz,  $\text{CDCl}_3$ )  $\delta$  161.1 (d,  $J=237.4$  Hz), 159.3, 141.0, 136.5 (d,  $J=12.4$  Hz), 128.8, 128.5, 126.1, 124.2, 122.7 (d,  $J=3.5$  Hz), 120.0 (d,  $J=10.3$  Hz), 116.1, 108.3, 108.2 (d,  $J=24.5$  Hz), 97.6 (d,  $J=26.1$  Hz), 31.7.

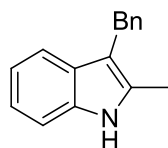

**3-benzyl-2-methyl-1H-indole (5i)**<sup>[1]</sup>  $^1\text{H}$  NMR (600 MHz,  $\text{CDCl}_3$ )  $\delta$  7.74 (br. s, 1H),



7.44 (d,  $J=7.8$  Hz, 1H), 7.33-7.24 (m, 5H), 7.22-7.17 (m, 1H), 7.15 (t,  $J=7.5$  Hz, 1H), 7.08 (t,  $J=7.4$  Hz, 1H), 4.11 (s, 2H), 2.39 (s, 3H).  $^{13}\text{C}$  NMR (150 MHz,  $\text{CDCl}_3$ )  $\delta$  141.8, 135.4, 131.8, 129.0, 128.4, 128.4, 125.8, 121.1, 119.4, 118.5, 110.7, 110.3, 30.2, 11.9.

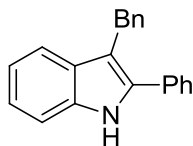

**3-benzyl-2-phenyl-1H-indole (5j)**<sup>[4]</sup>  $^1\text{H}$  NMR (600 MHz,  $\text{CDCl}_3$ )  $\delta$  8.13 (br. s, 1H), 7.54 (d,  $J=7.3$  Hz, 2H), 7.47-7.24 (m, 5H), 7.30-7.17 (m, 6H), 7.09 (t,  $J=7.5$  Hz, 1H), 4.30 (s, 2H).  $^{13}\text{C}$  NMR (150 MHz,  $\text{CDCl}_3$ )  $\delta$  141.6, 136.1, 135.6, 133.0, 129.6, 129.0, 128.5, 128.4, 128.0, 127.9, 125.9, 122.5, 119.9, 119.8, 111.2, 110.9, 30.56.

## 4. Copies of $^1\text{H}$ NMR and $^{13}\text{C}$ NMR spectra

### 3-benzyl-1H-indole (3a)

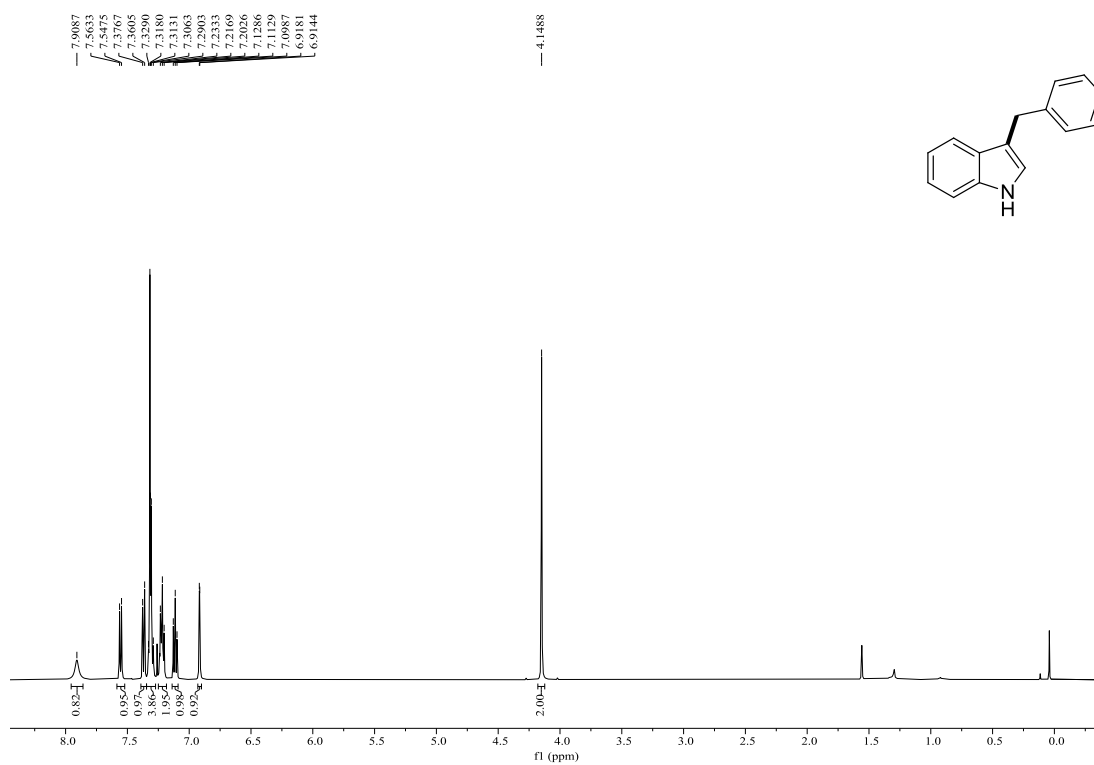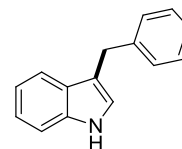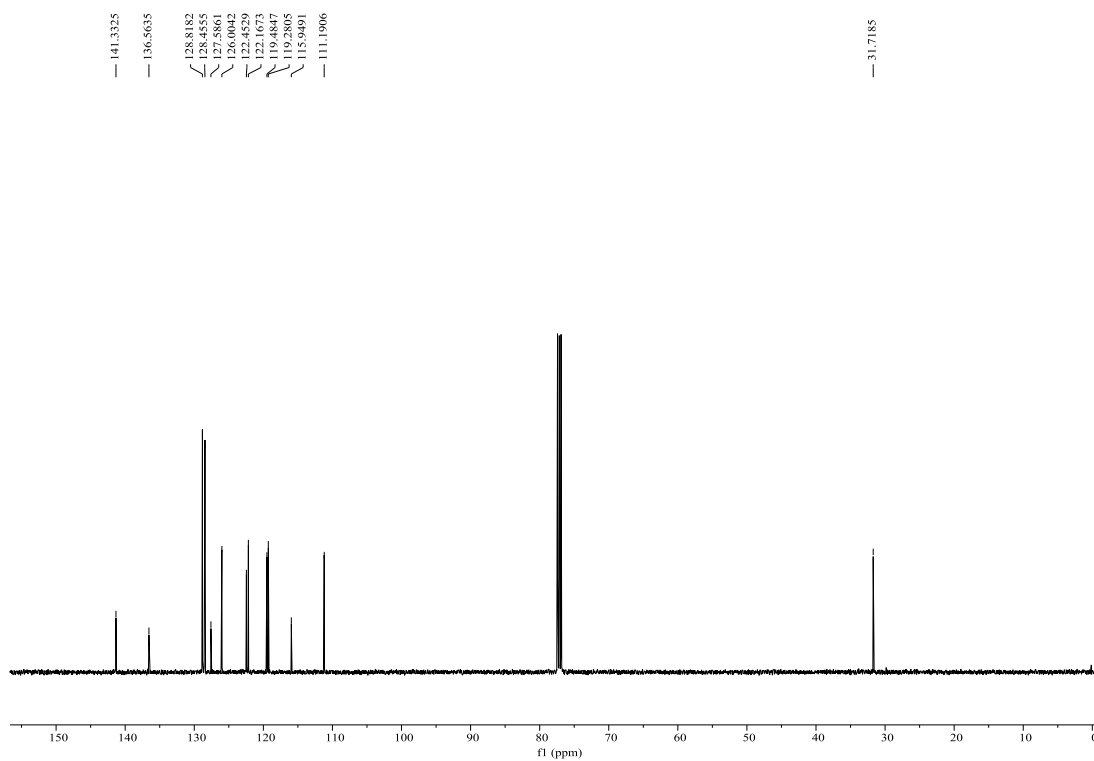

### 3-(4-methylbenzyl)-1H-indole (3b)

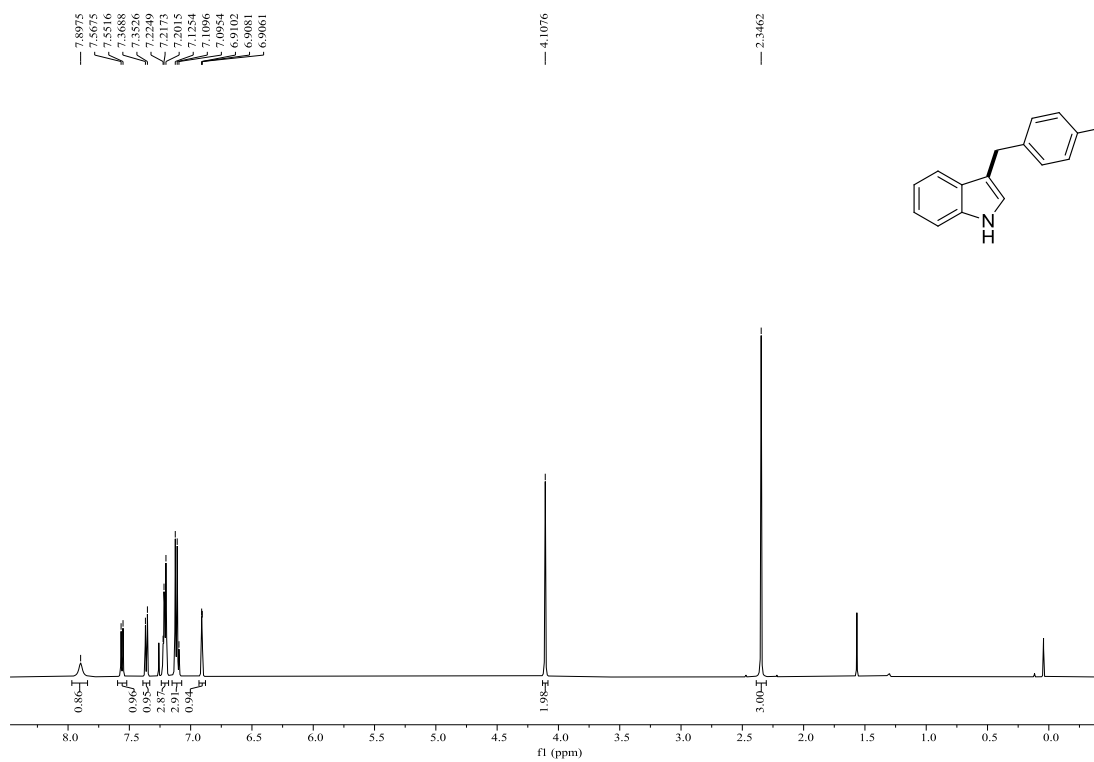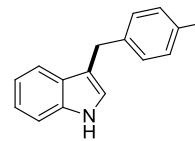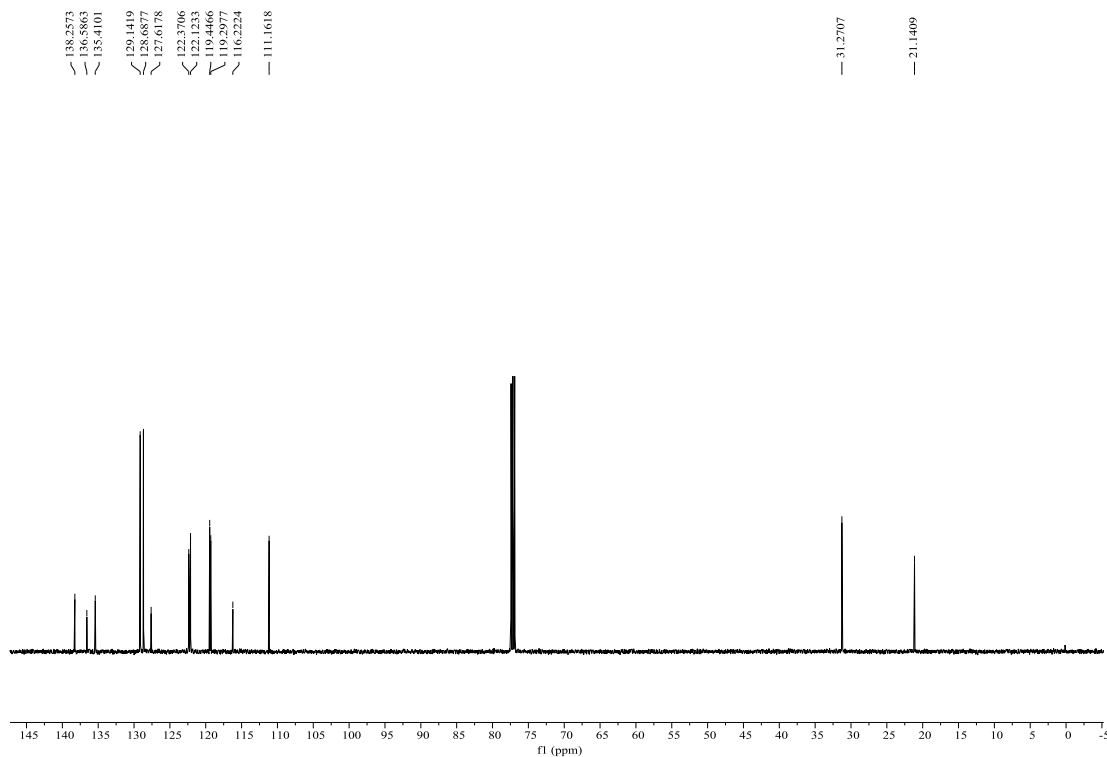

**3-(3-methylbenzyl)-1H-indole (3c)**

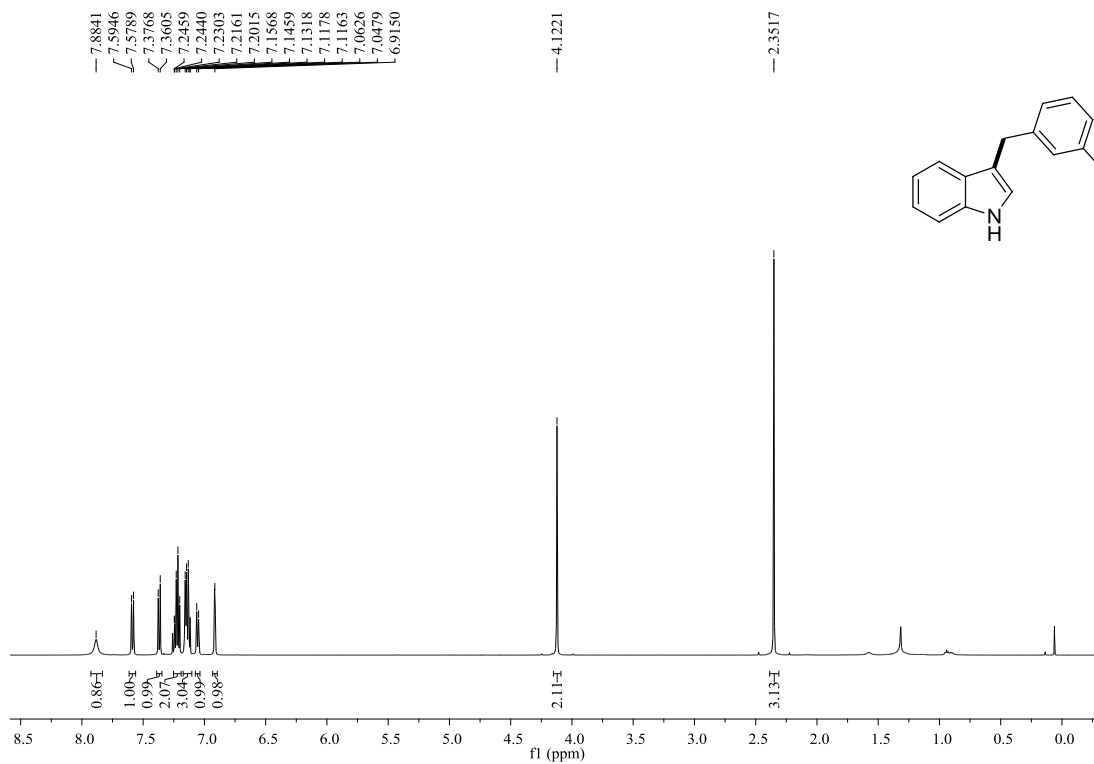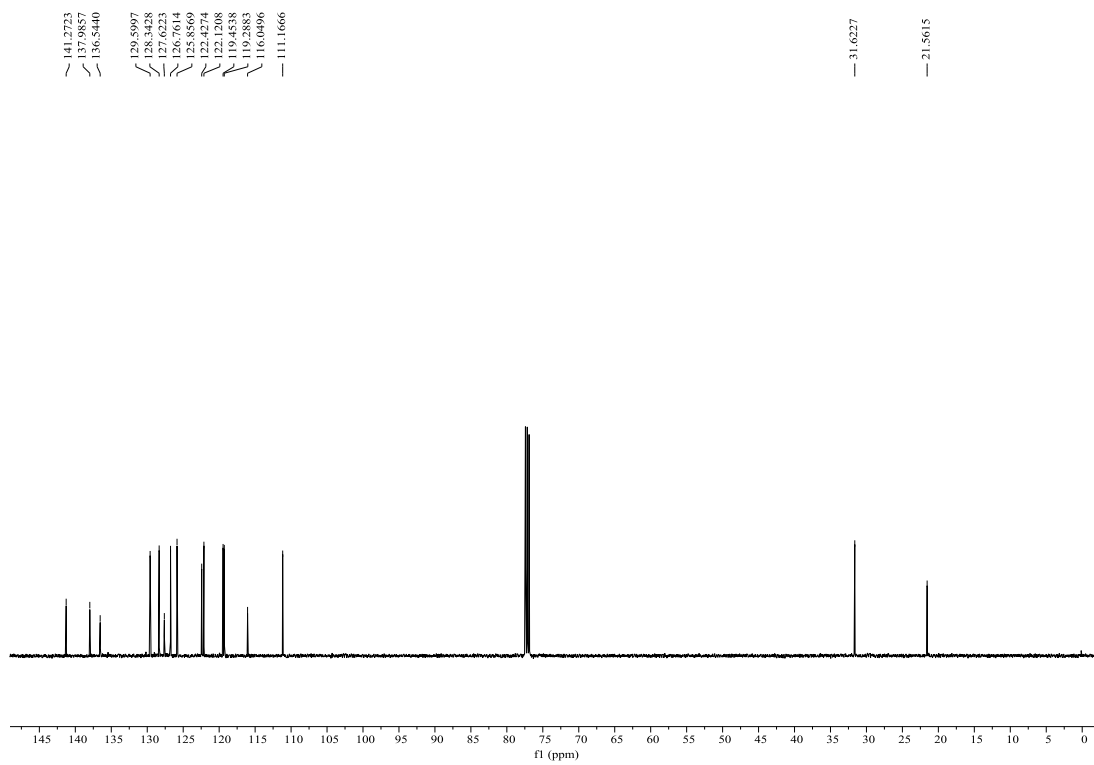

### 3-(2-methylbenzyl)-1H-indole (3d)

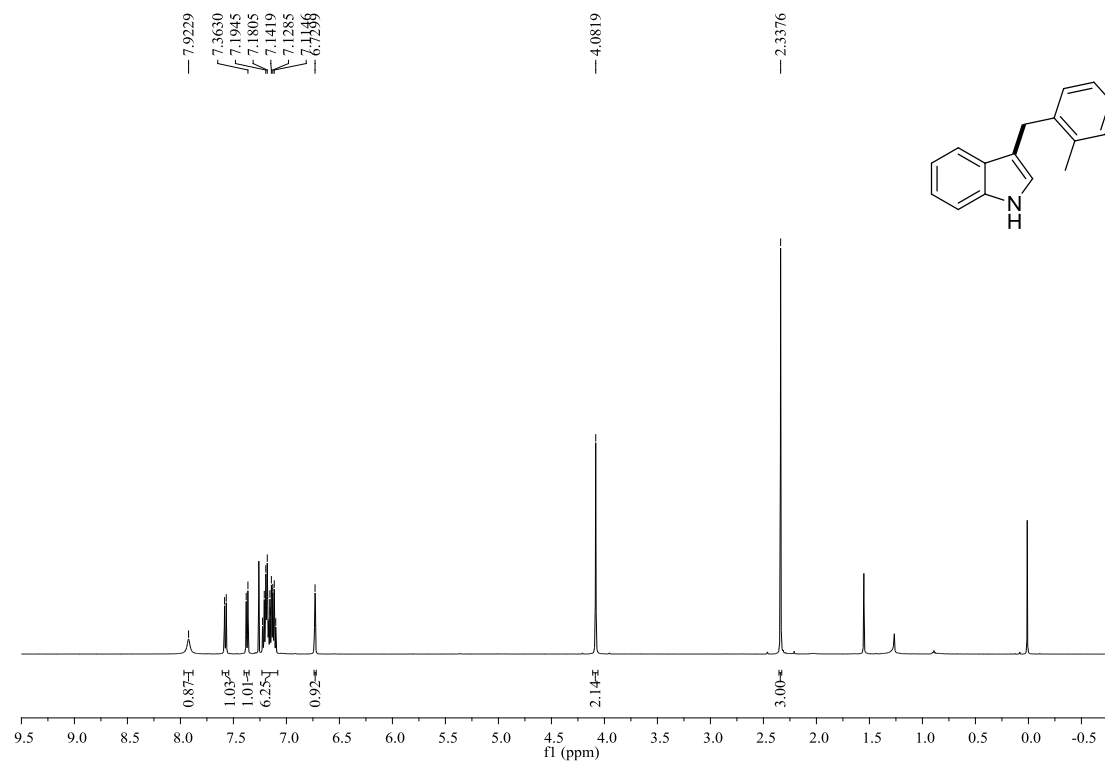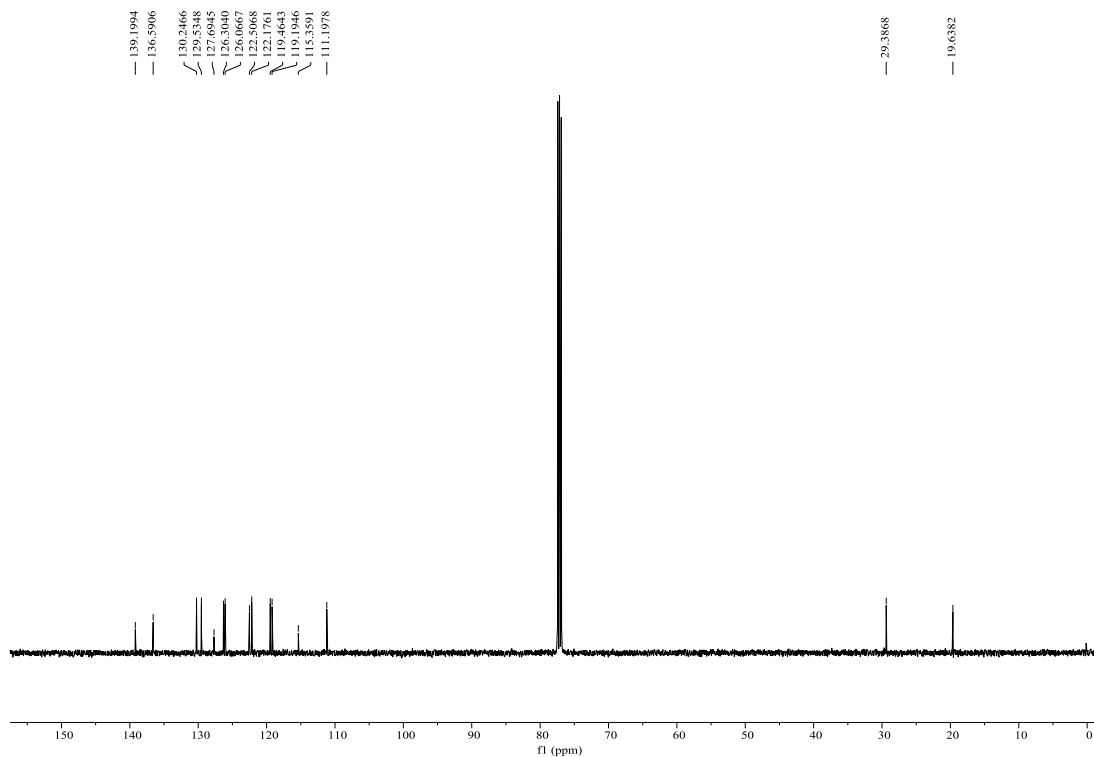

### 3-(4-methoxybenzyl)-1H-indole (3e)

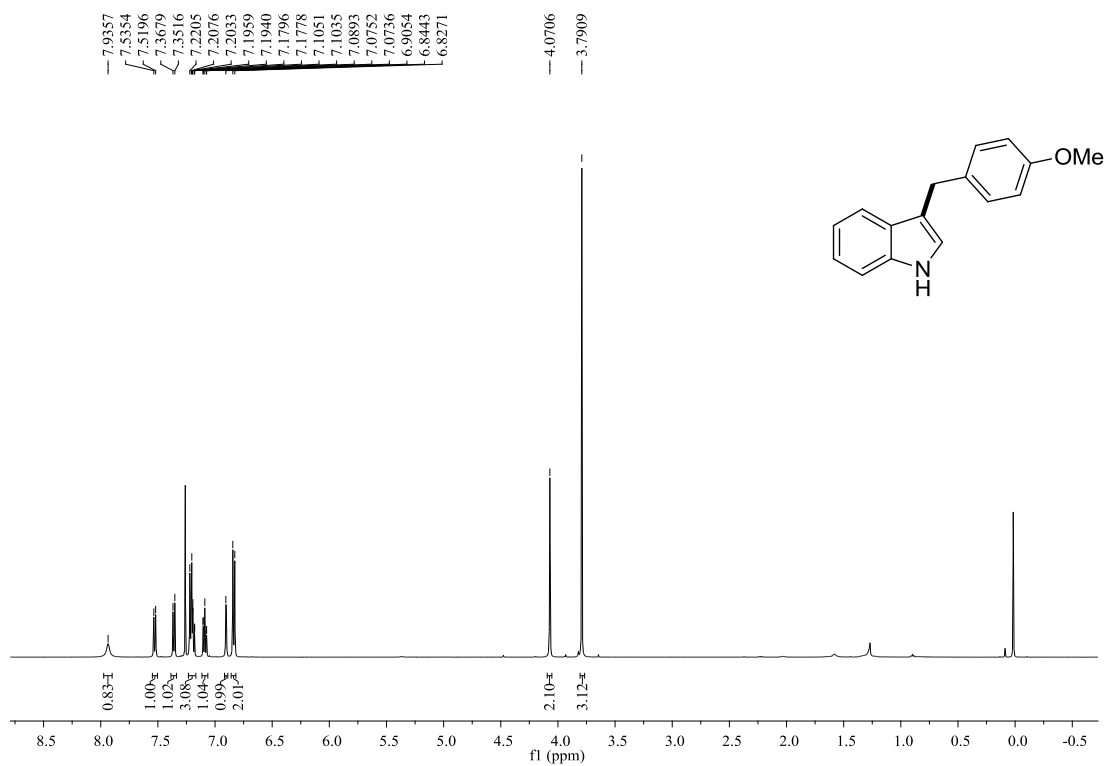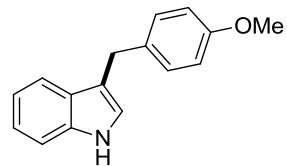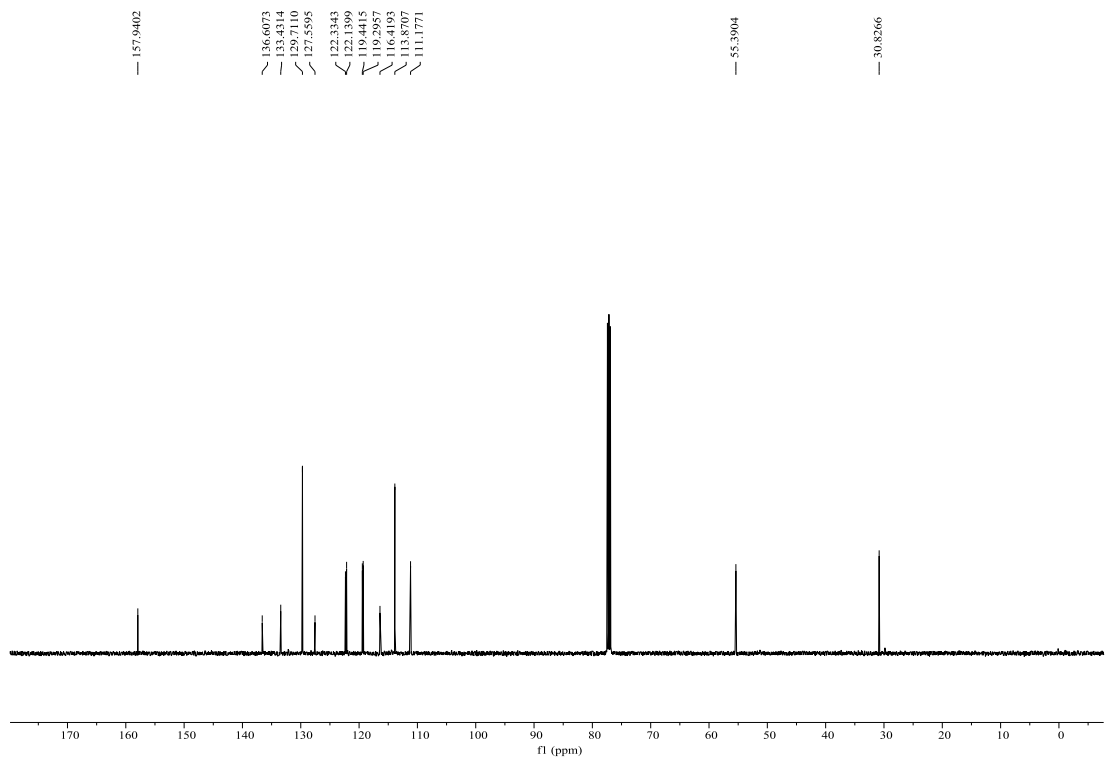

**3-(2,4-dimethoxybenzyl)-1H-indole (3f)**

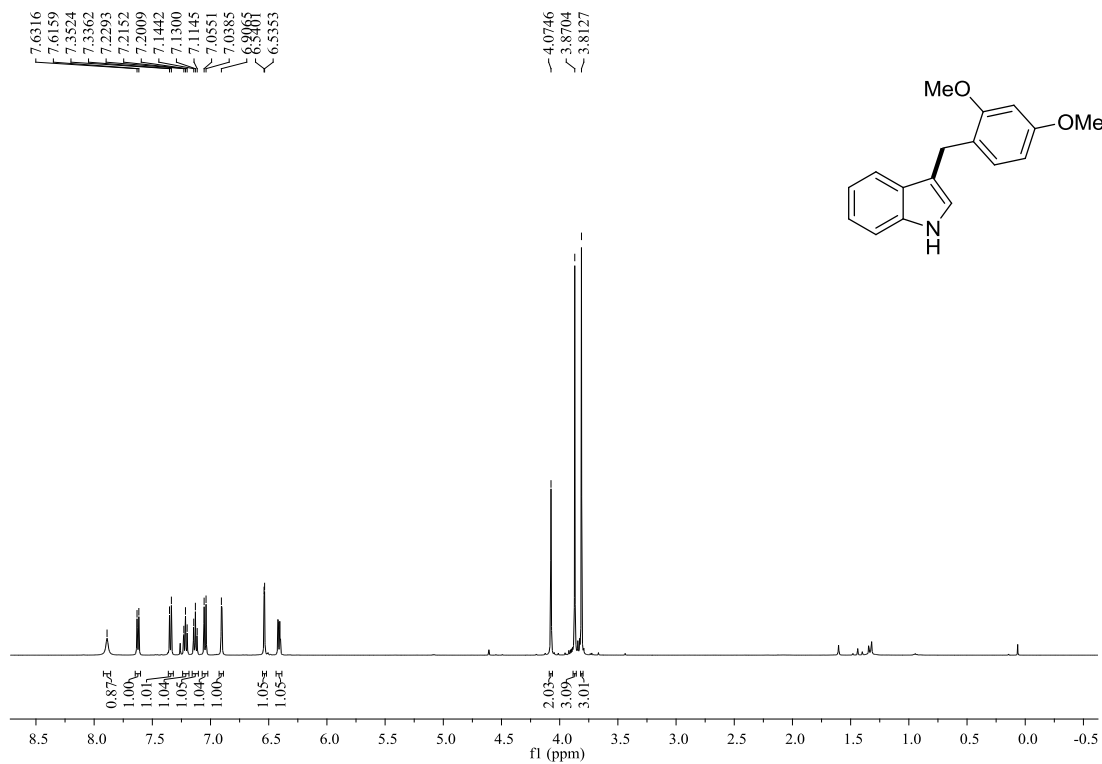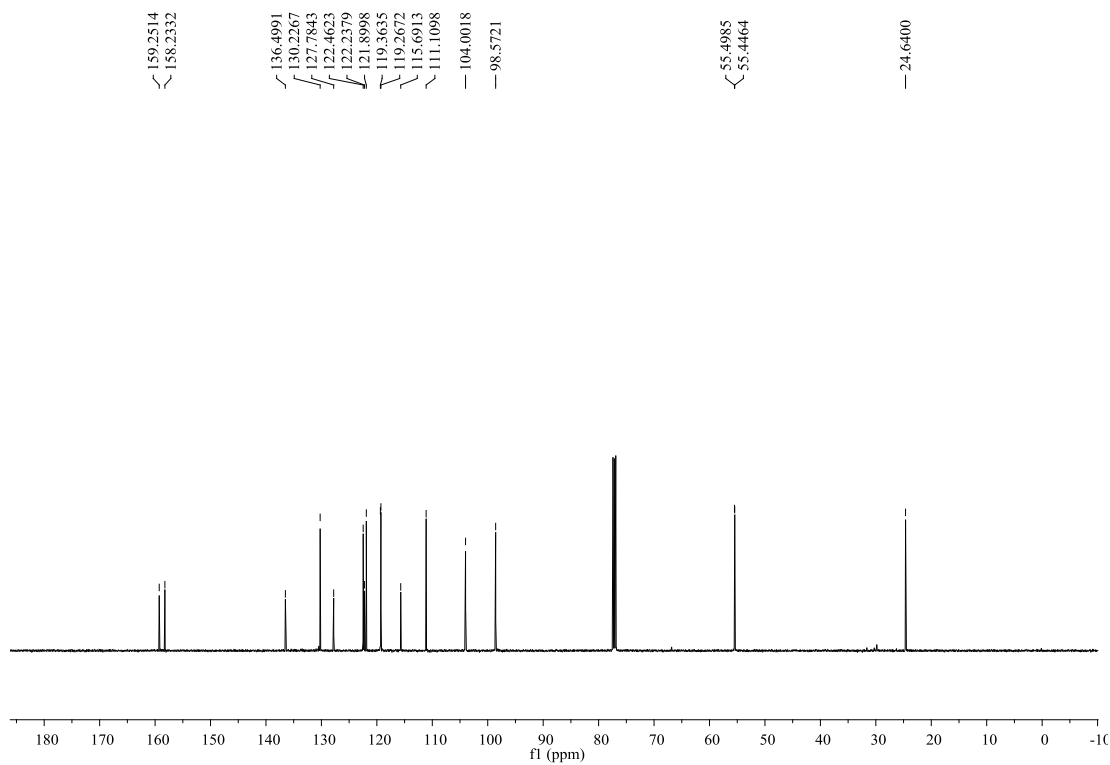

### 3-(2,6-dimethylbenzyl)-1H-indole (3g)

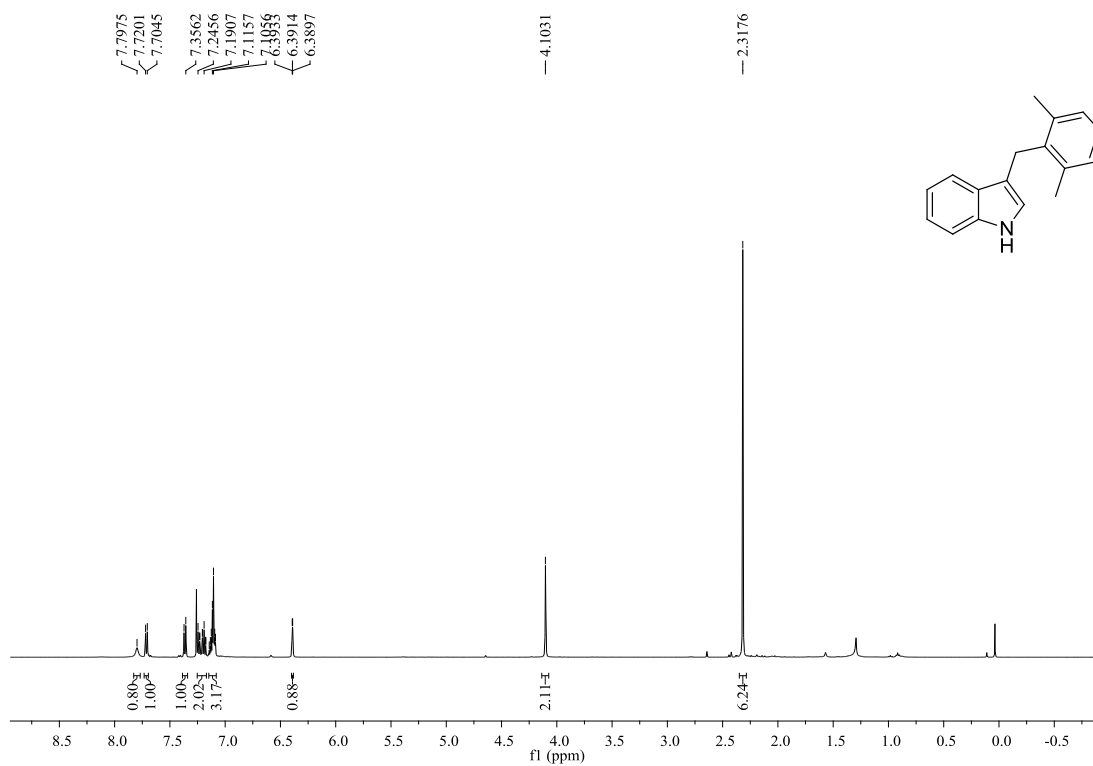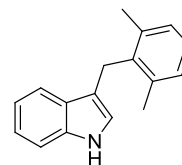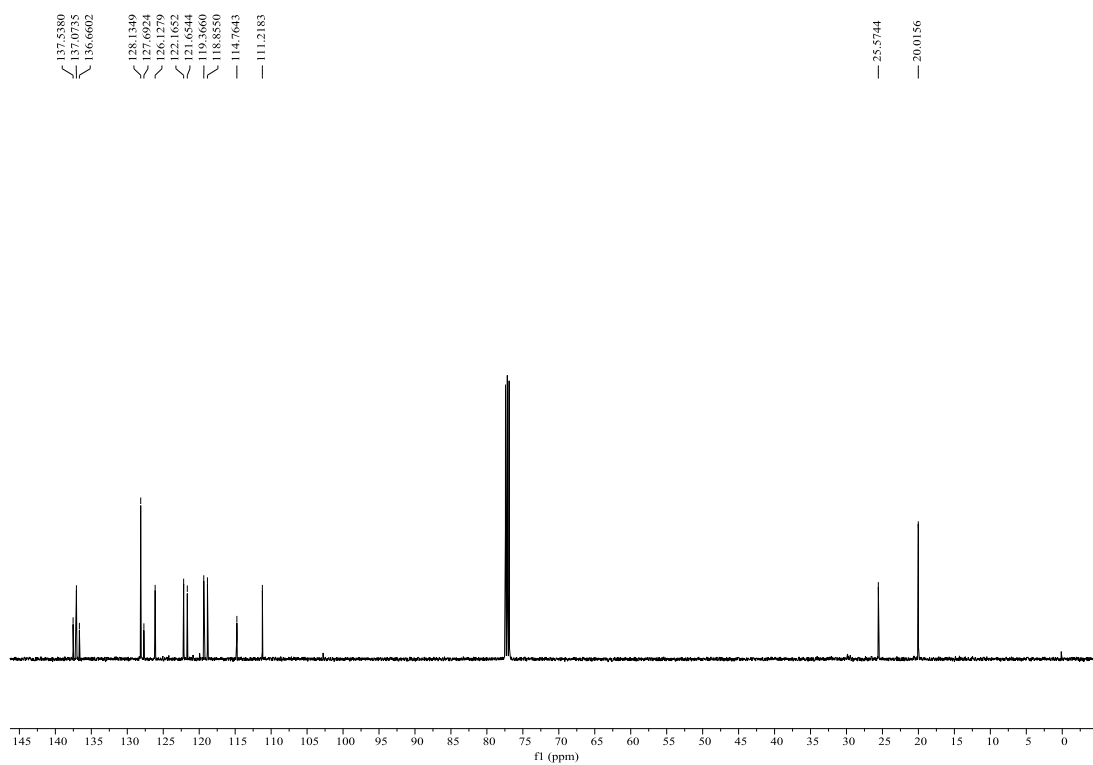



### 4-((1*H*-indol-3-yl)methyl)aniline (3h)

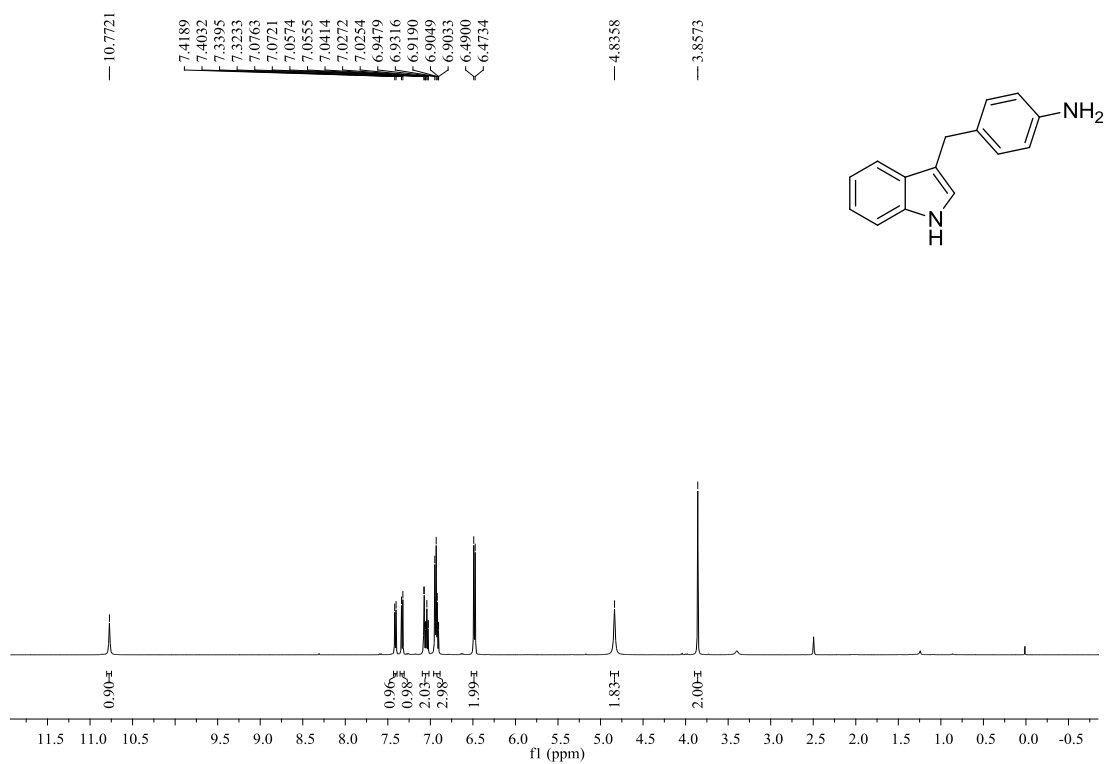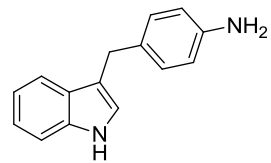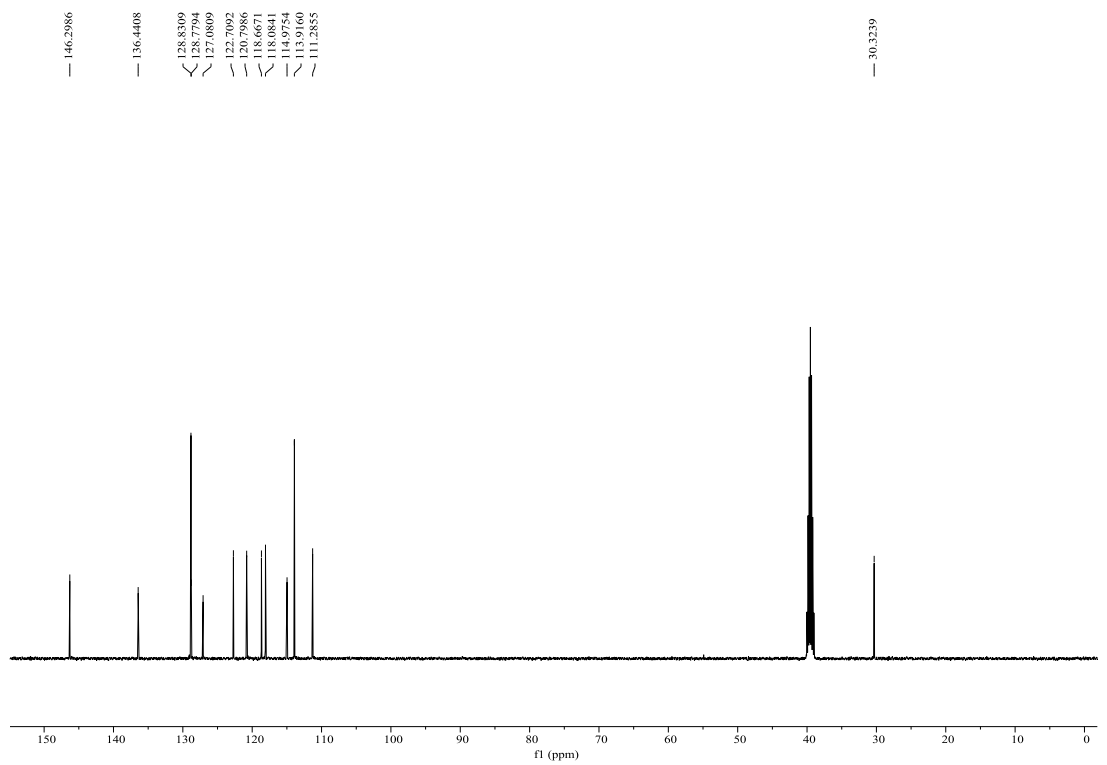

### 3-(4-fluorobenzyl)-1H-indole (3i)

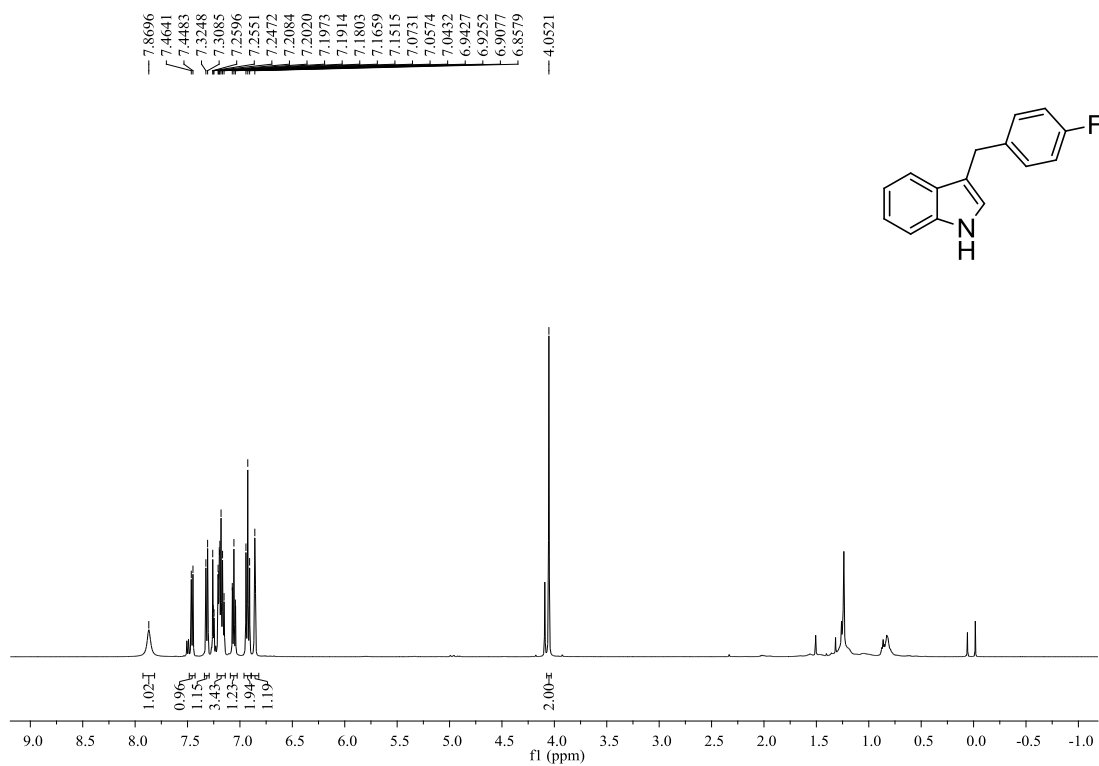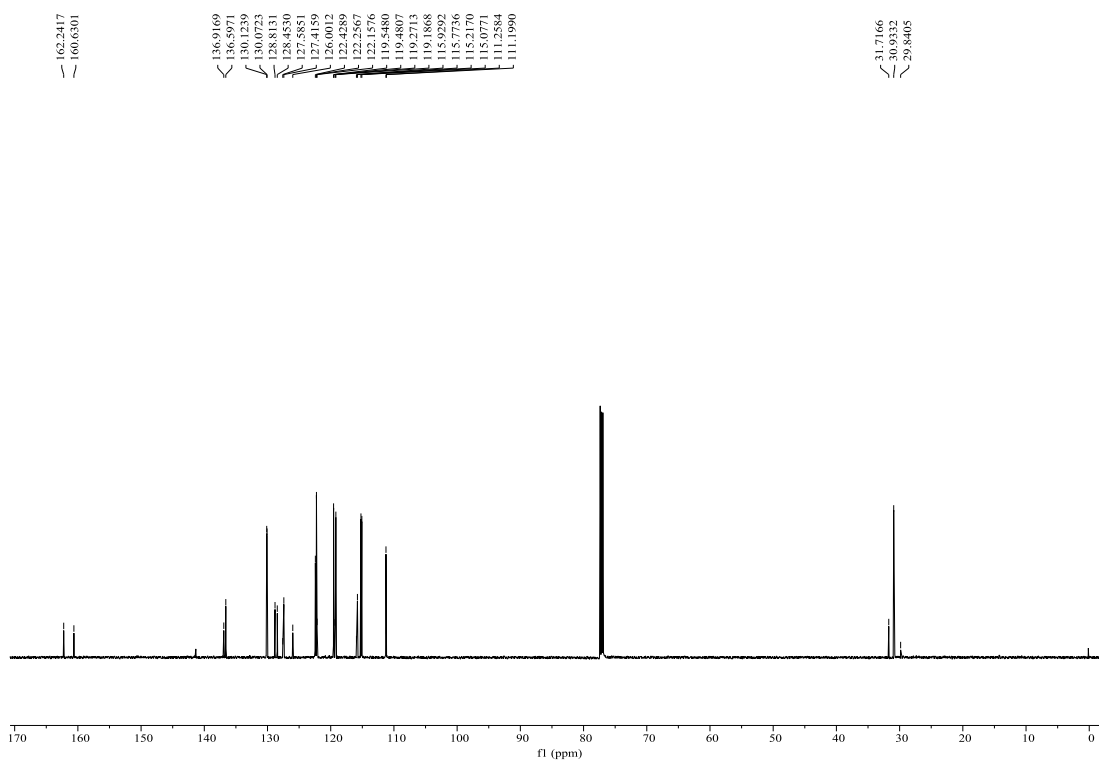

### 3-(naphthalen-2-ylmethyl)-1H-indole (3j)

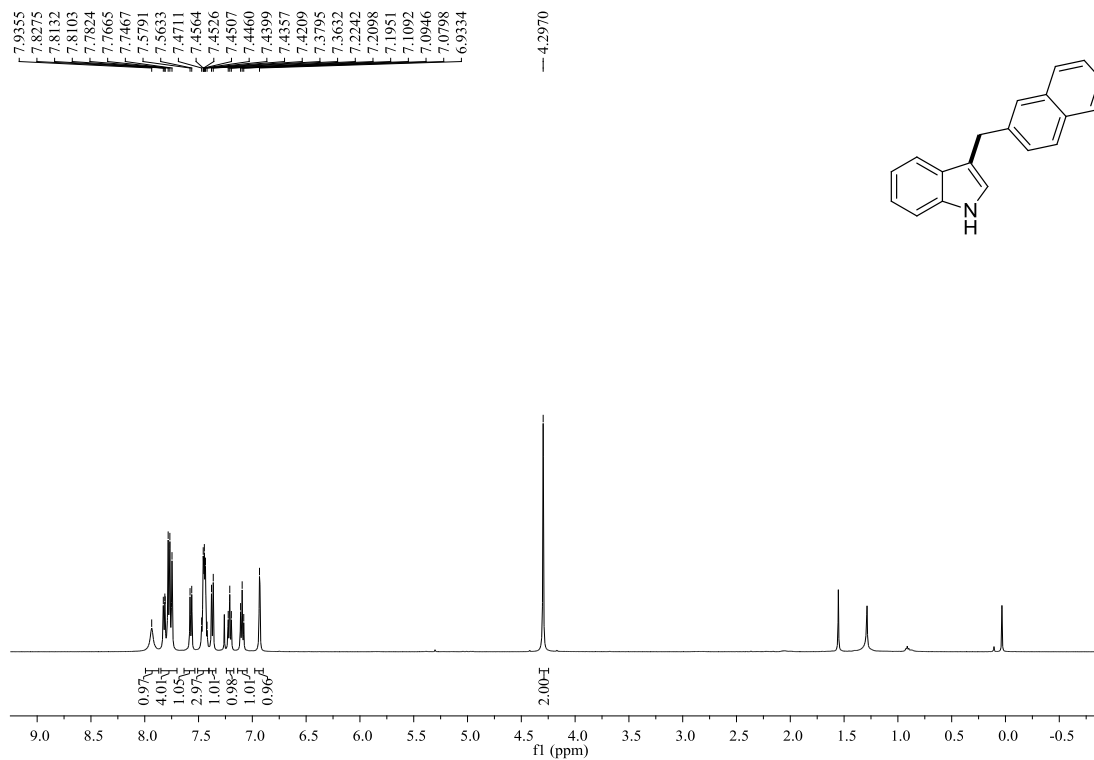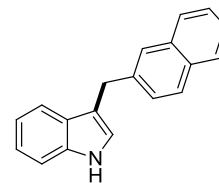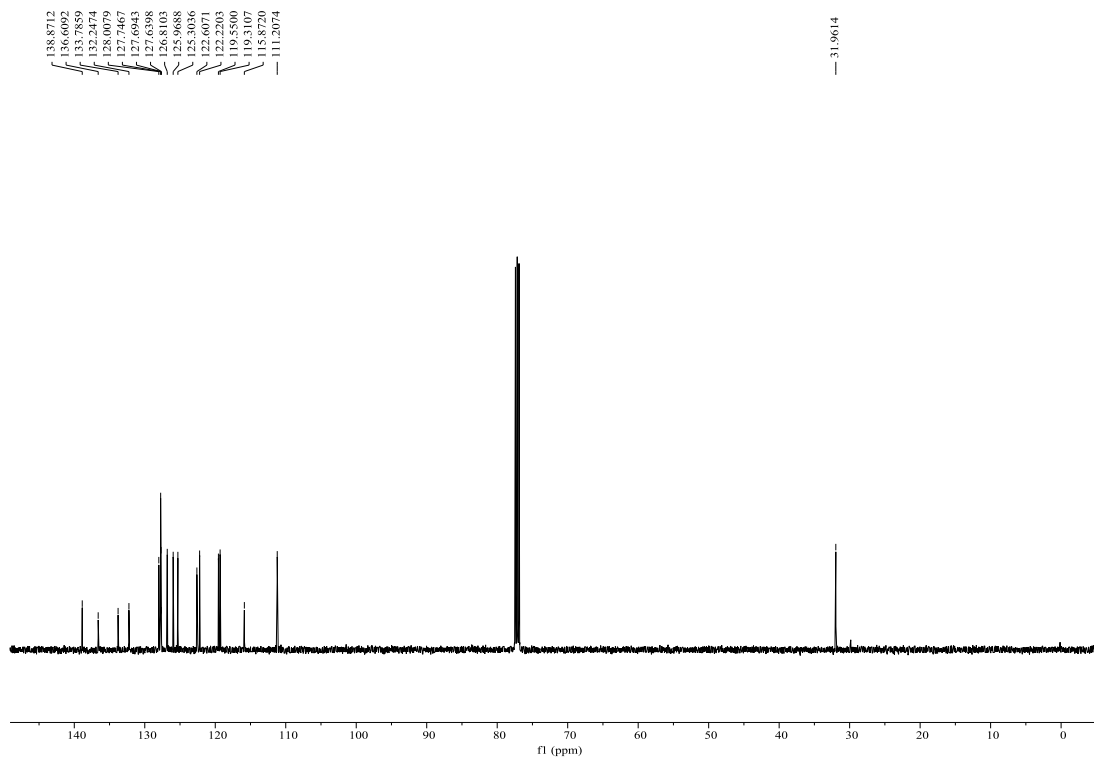

### 3-(1-phenylethyl)-1H-indole (3k)

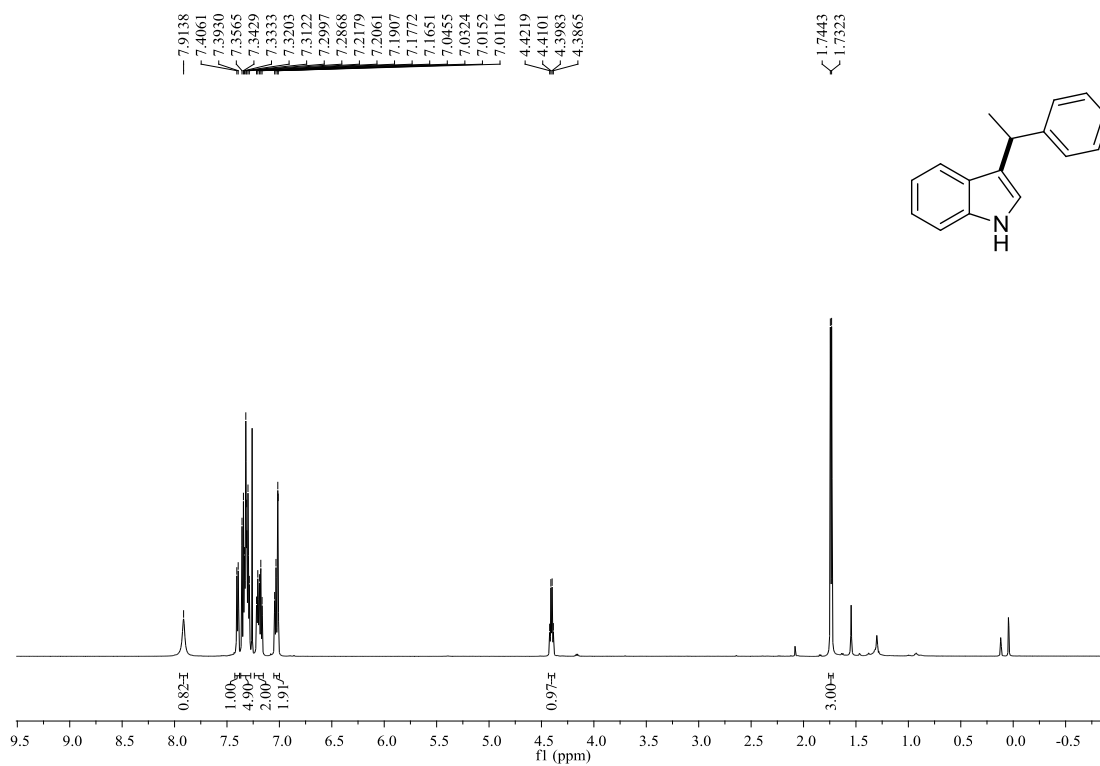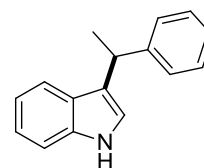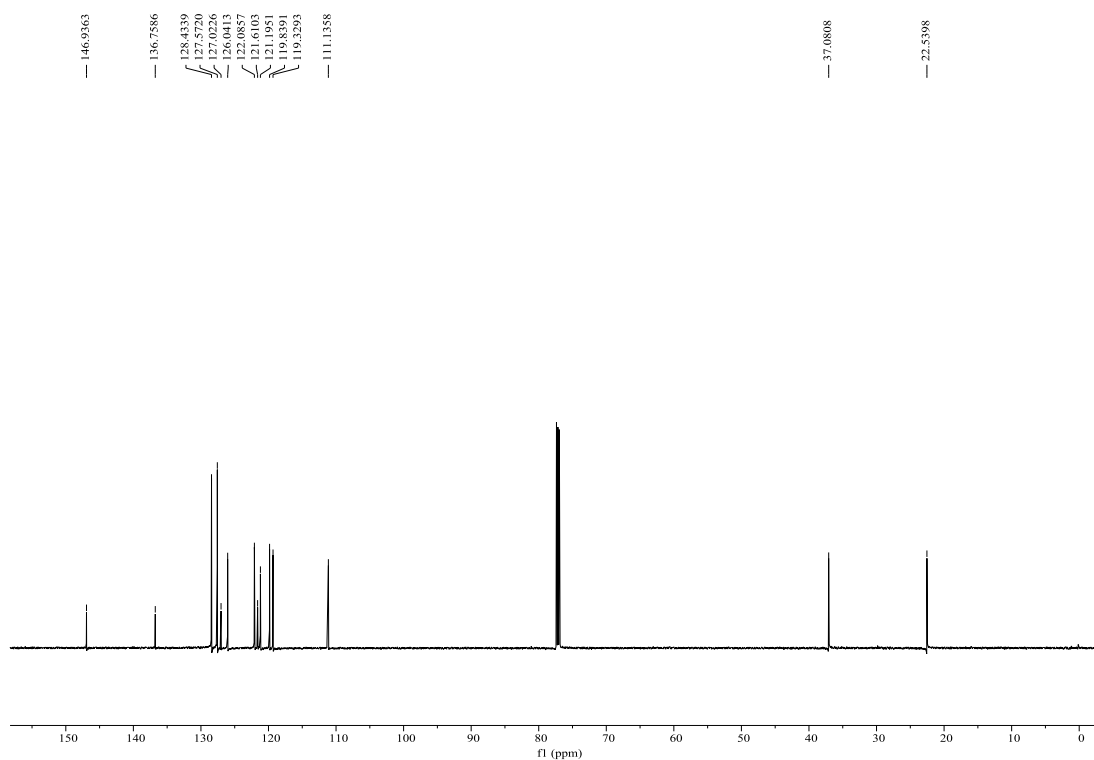

### 3-benzhydryl-1H-indole (3l)

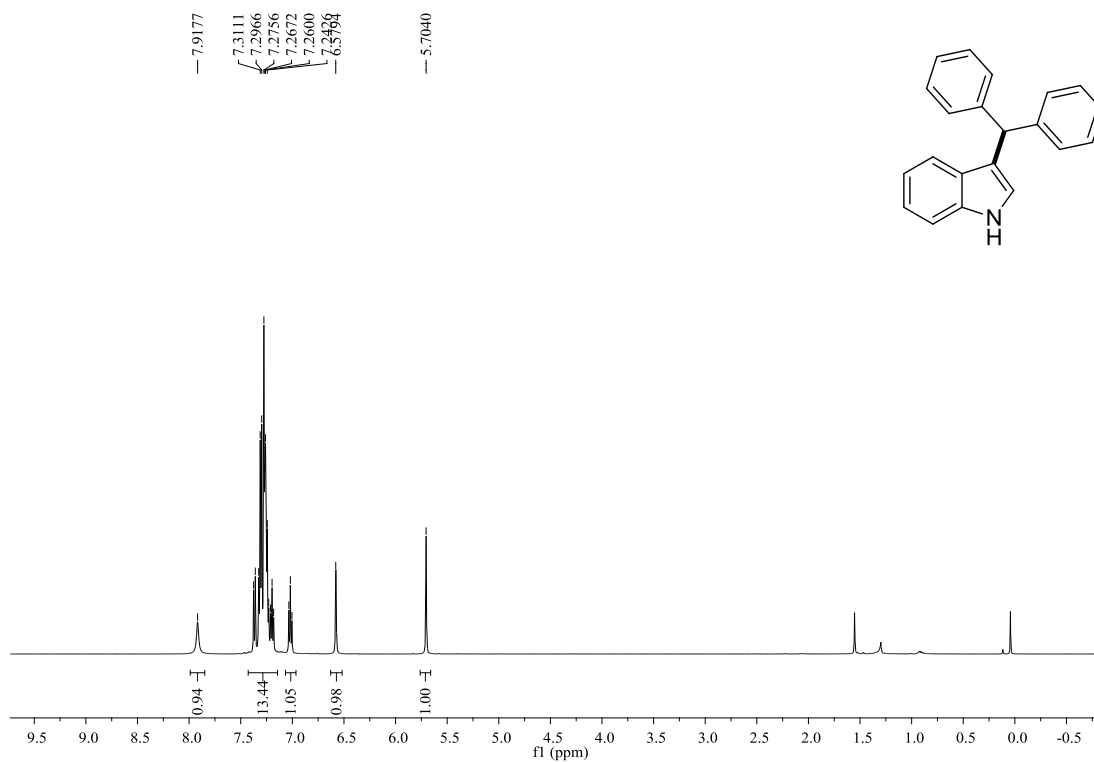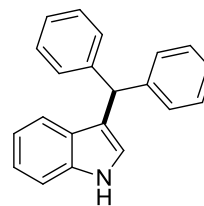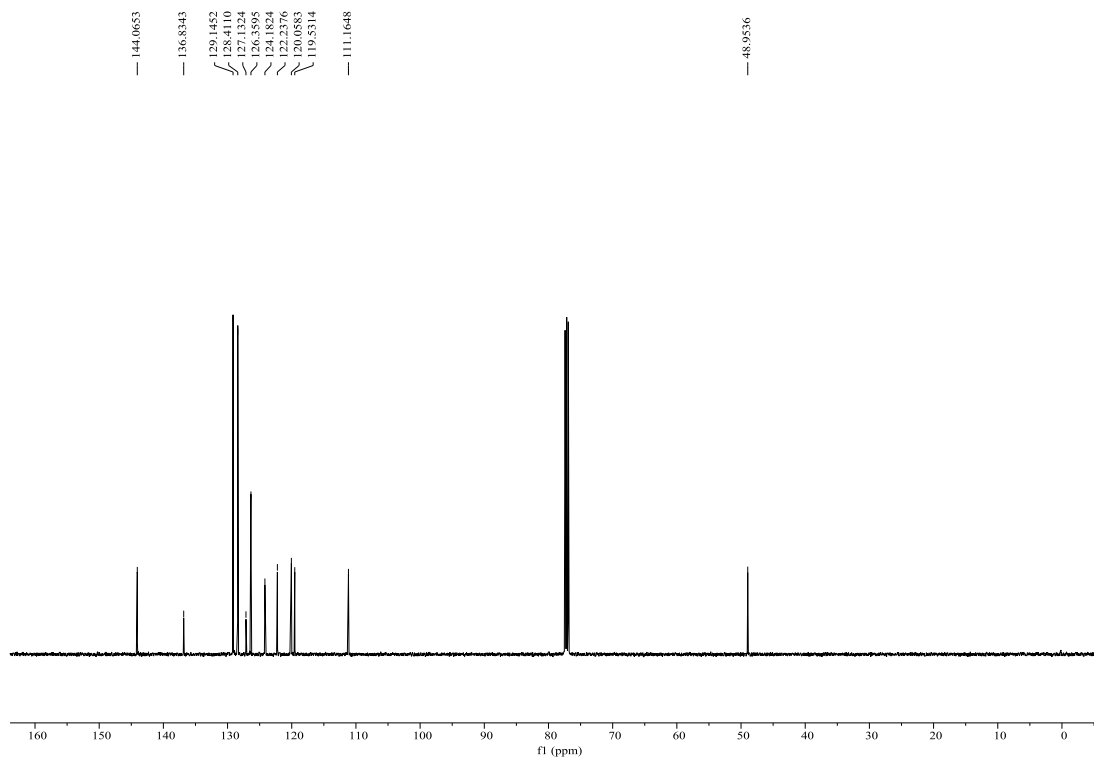

### 3-(pyridin-2-ylmethyl)-1H-indole (3m)

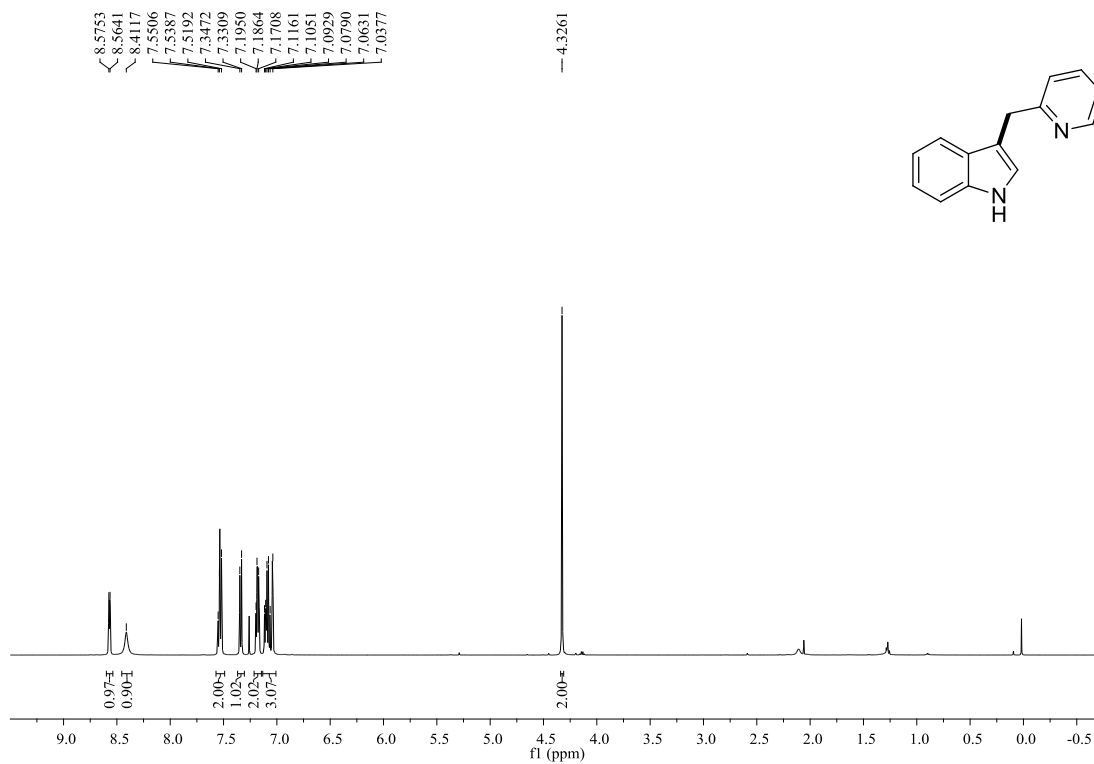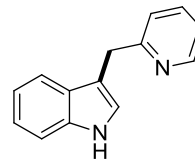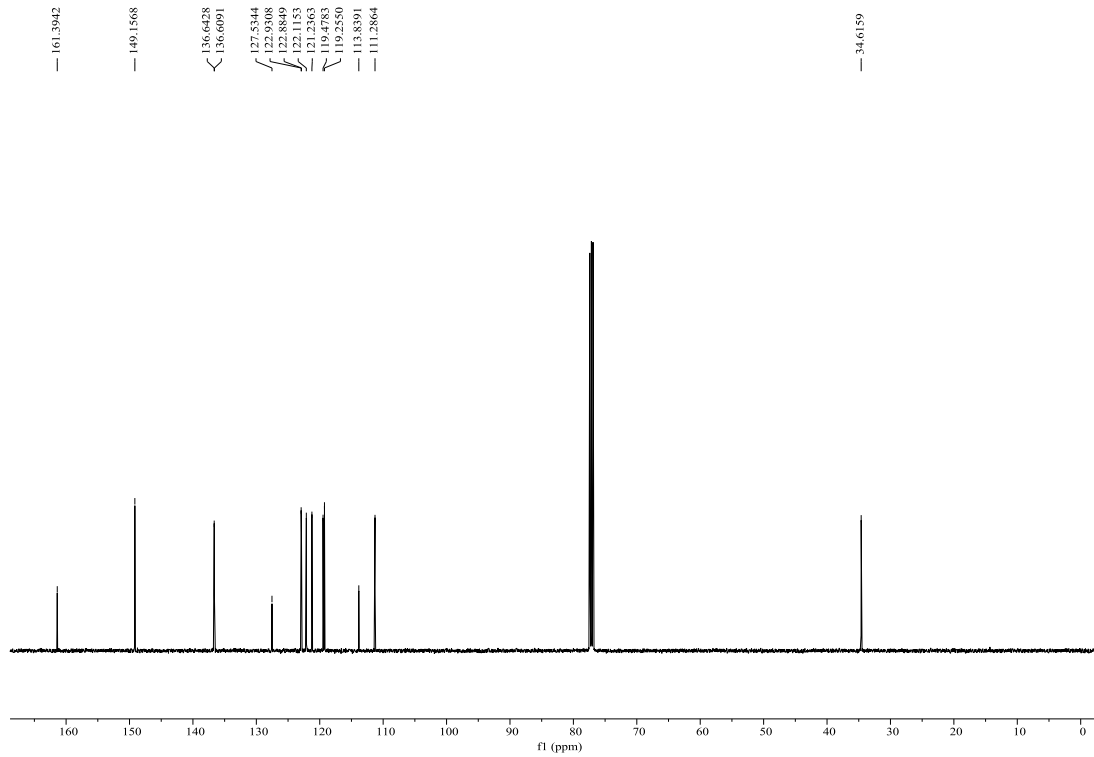

### 3-(thiophen-2-ylmethyl)-1H-indole (3n)

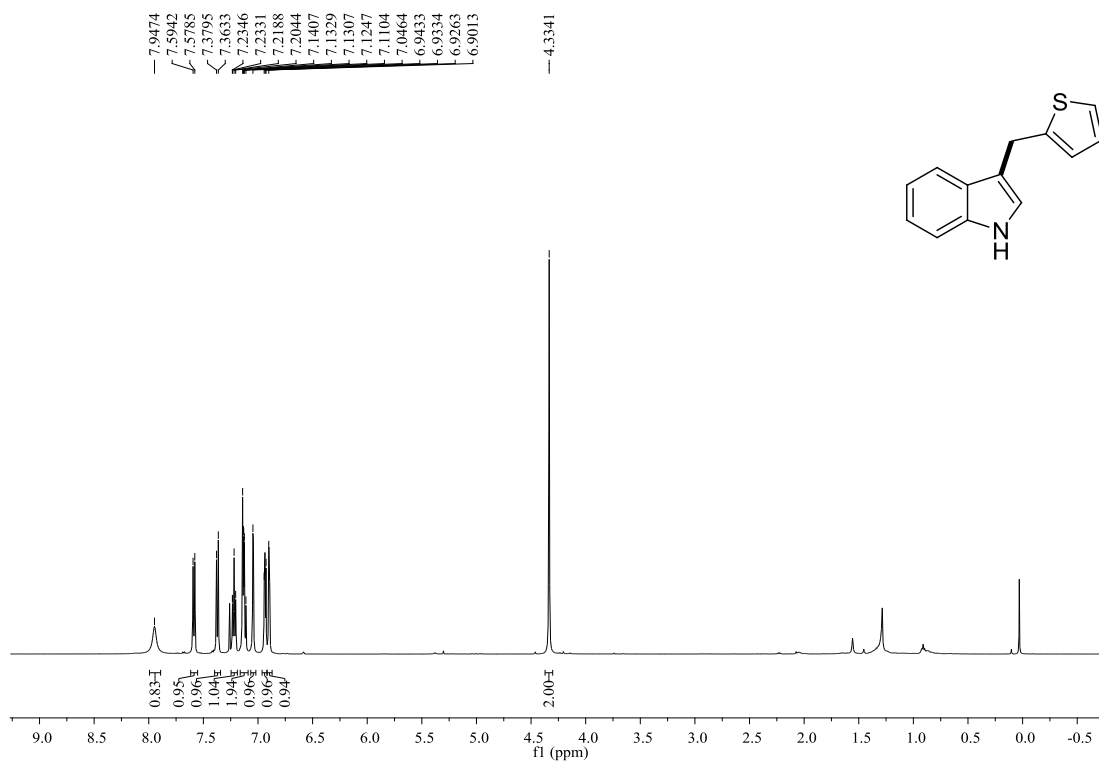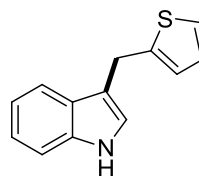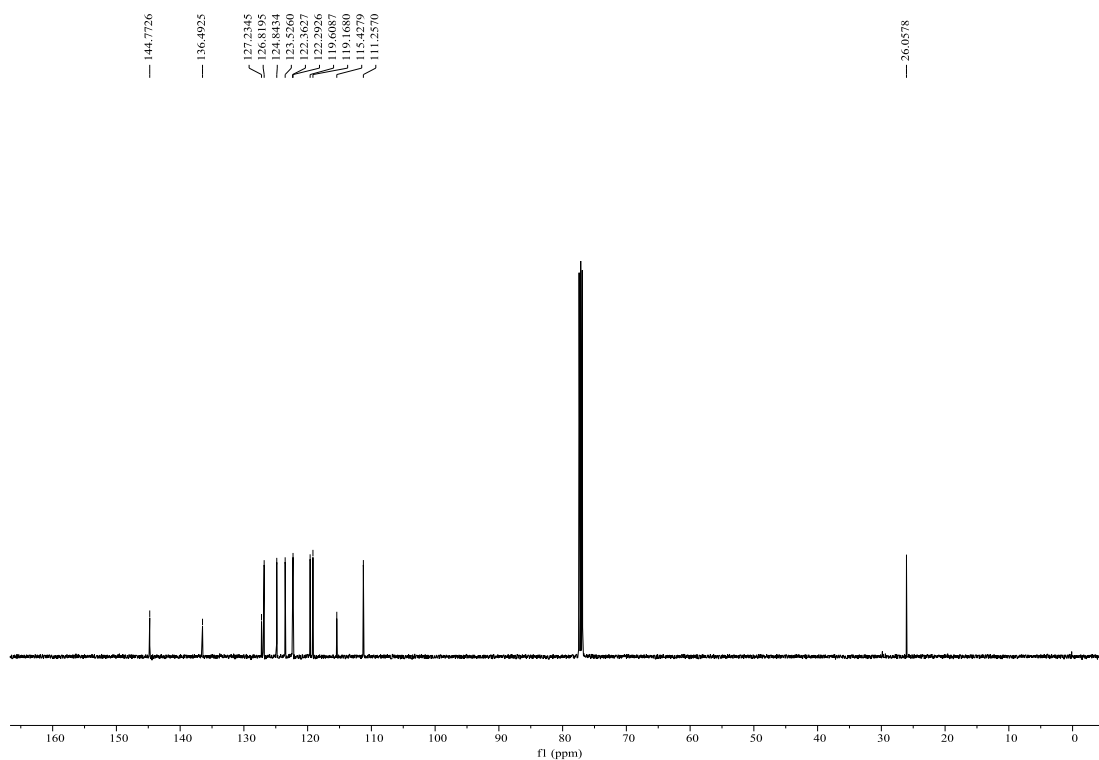

### 3-(furan-2-ylmethyl)-1H-indole (3o)

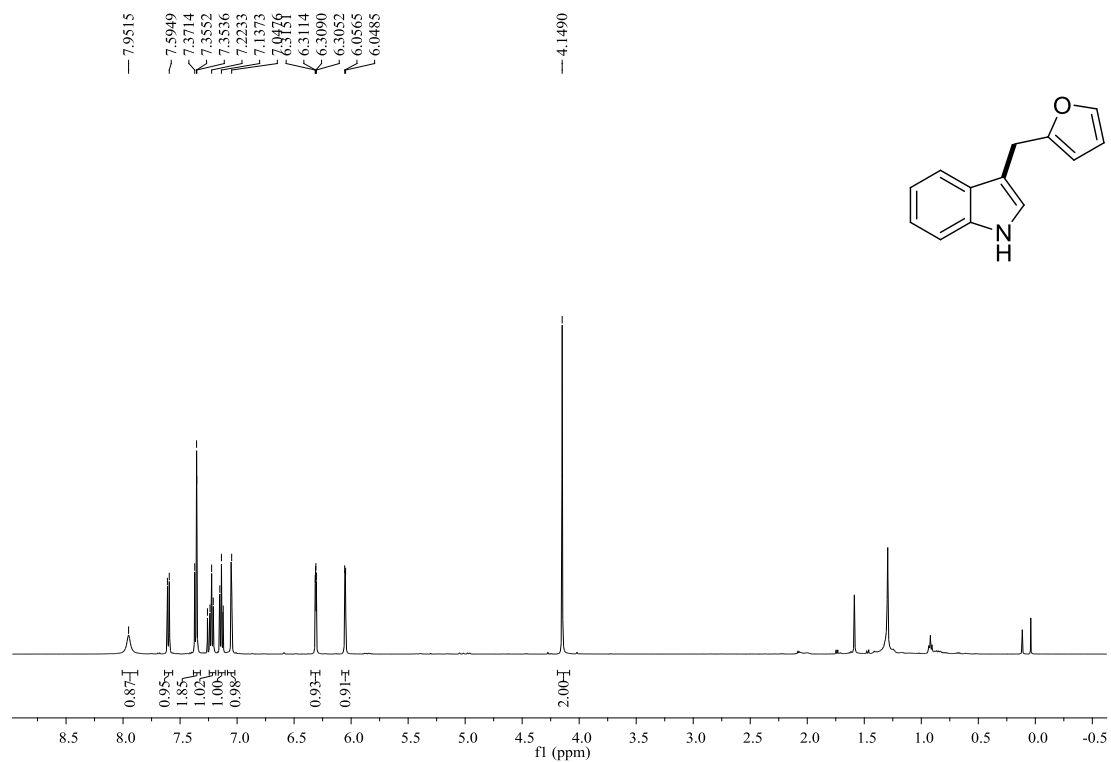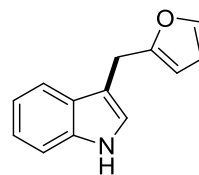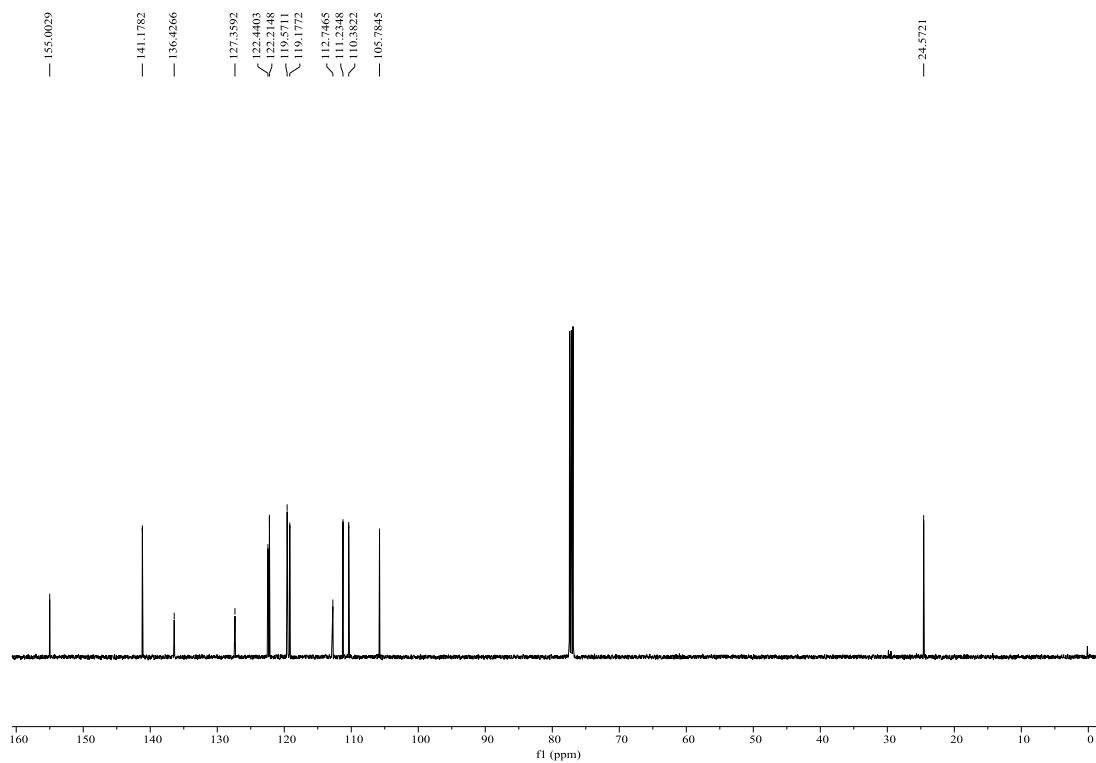



### 3-(1-(pyridin-2-yl)ethyl)-1H-indole (3p)

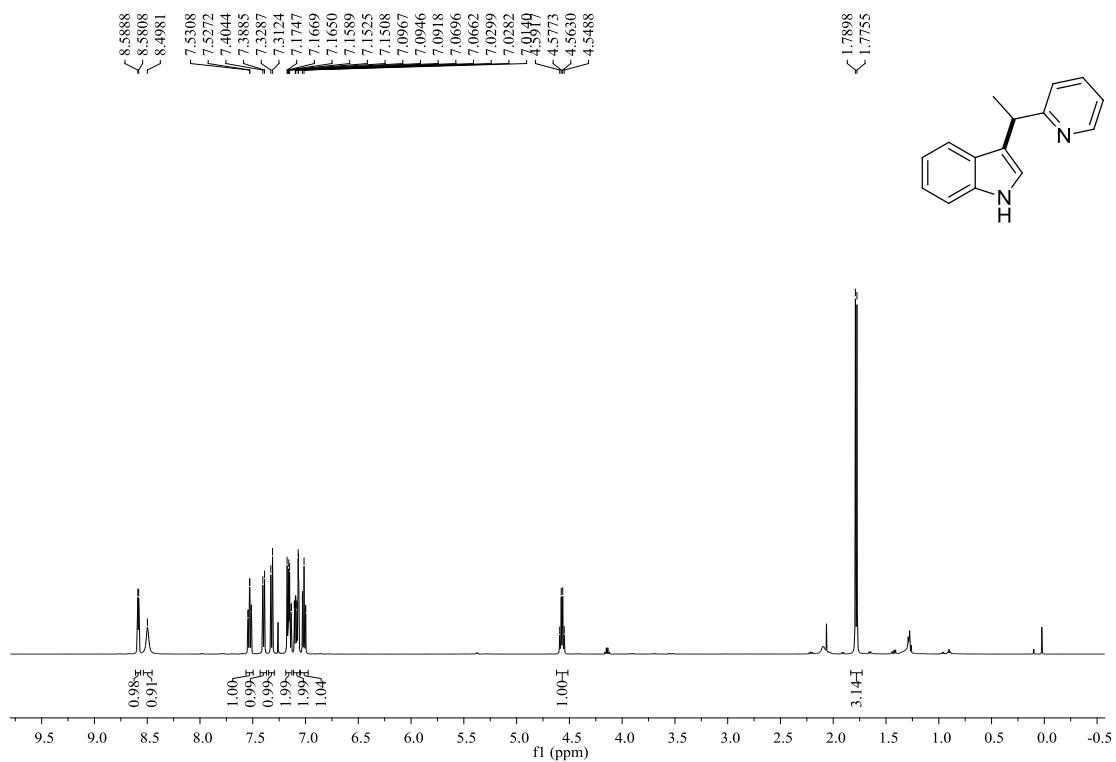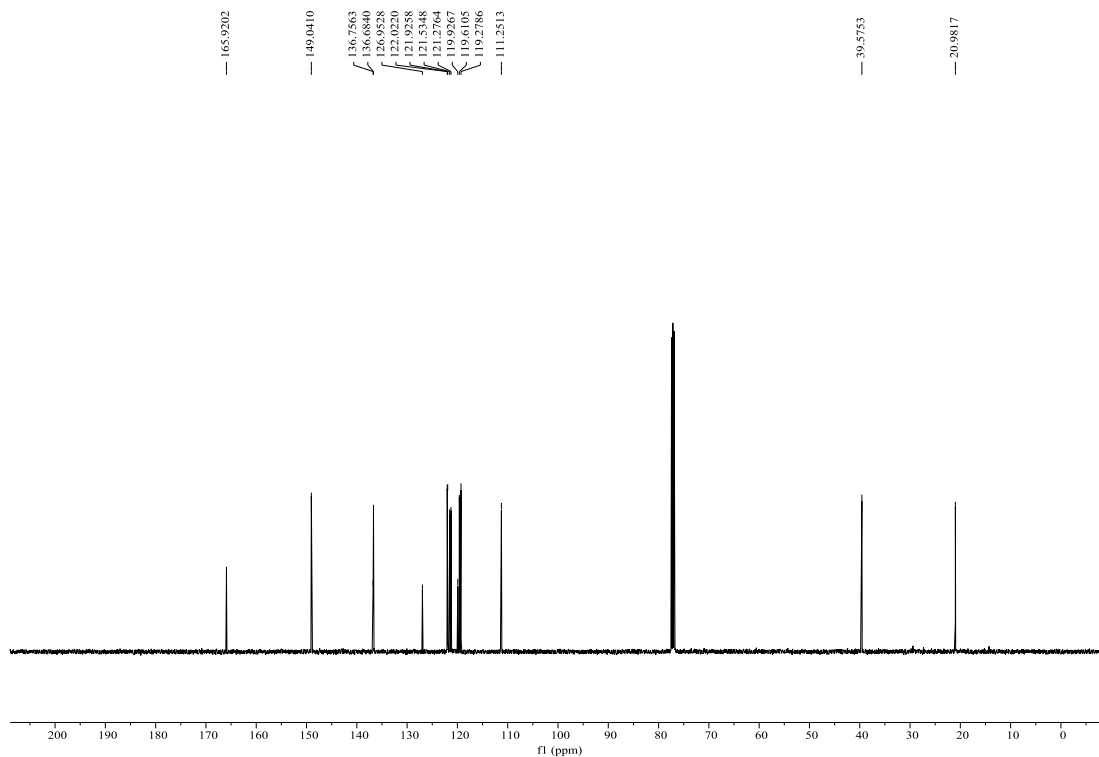

### 3-(1-(thiophen-2-yl)ethyl)-1H-indole (3q)

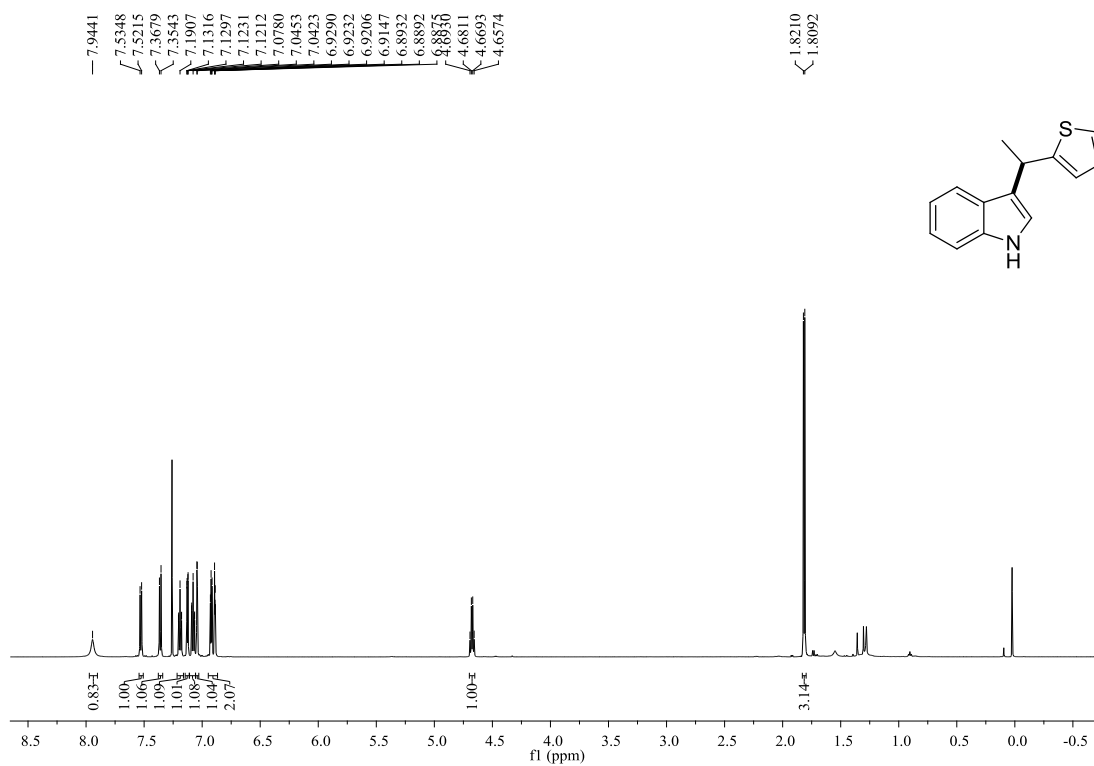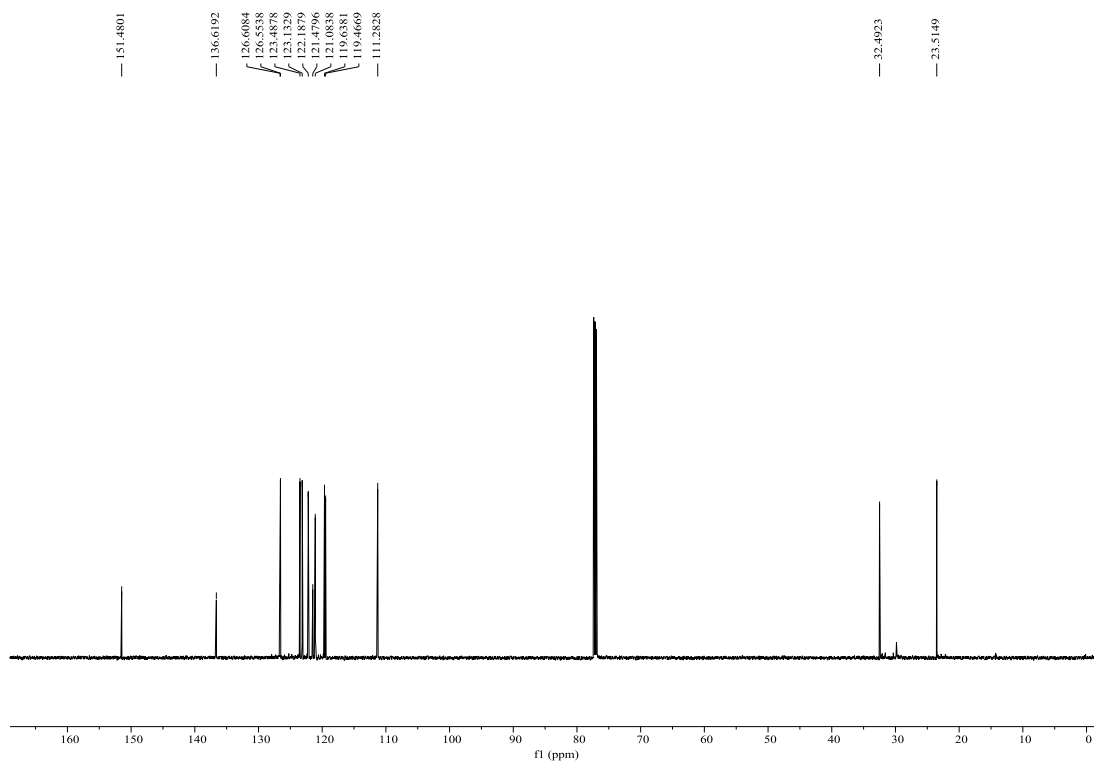

### 3-methyl-1H-indole (4a)

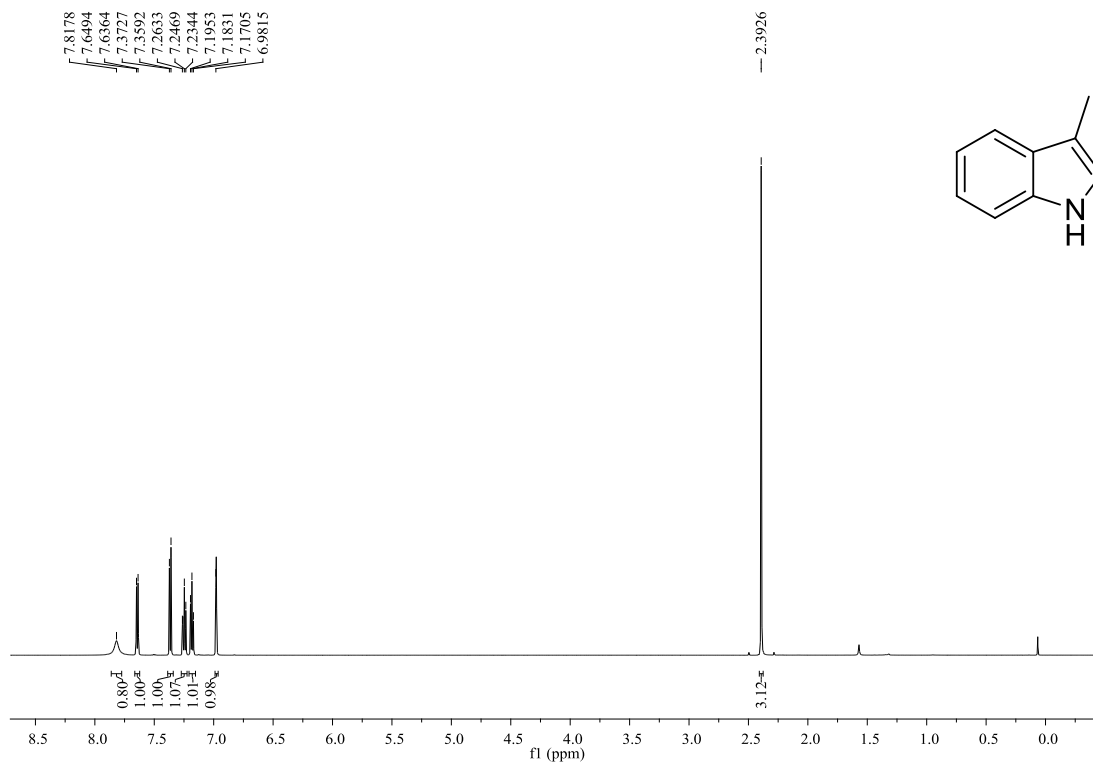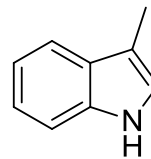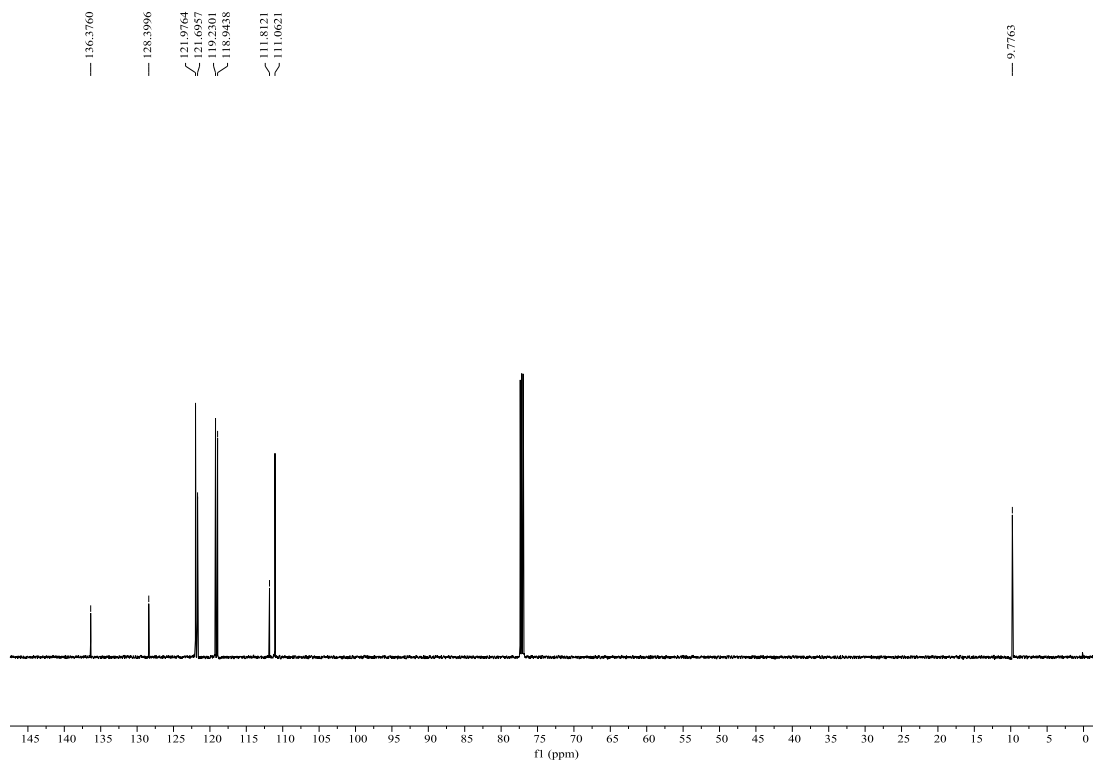

### 3-butyl-1H-indole (4b)

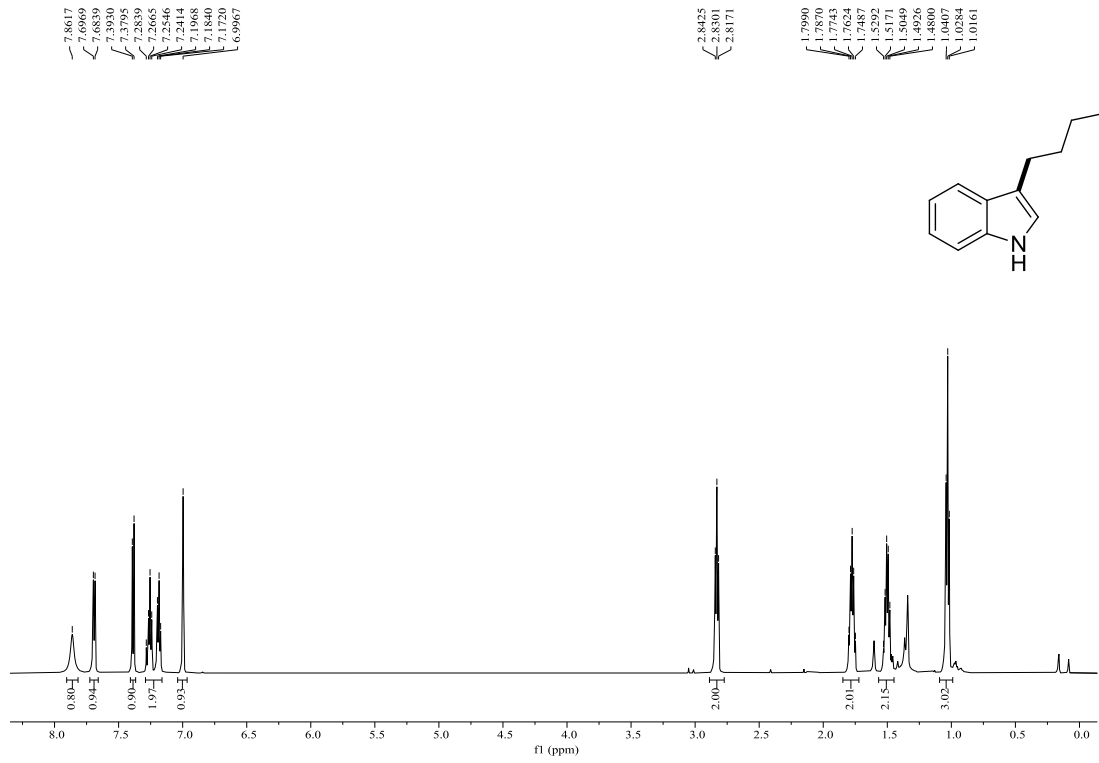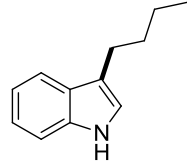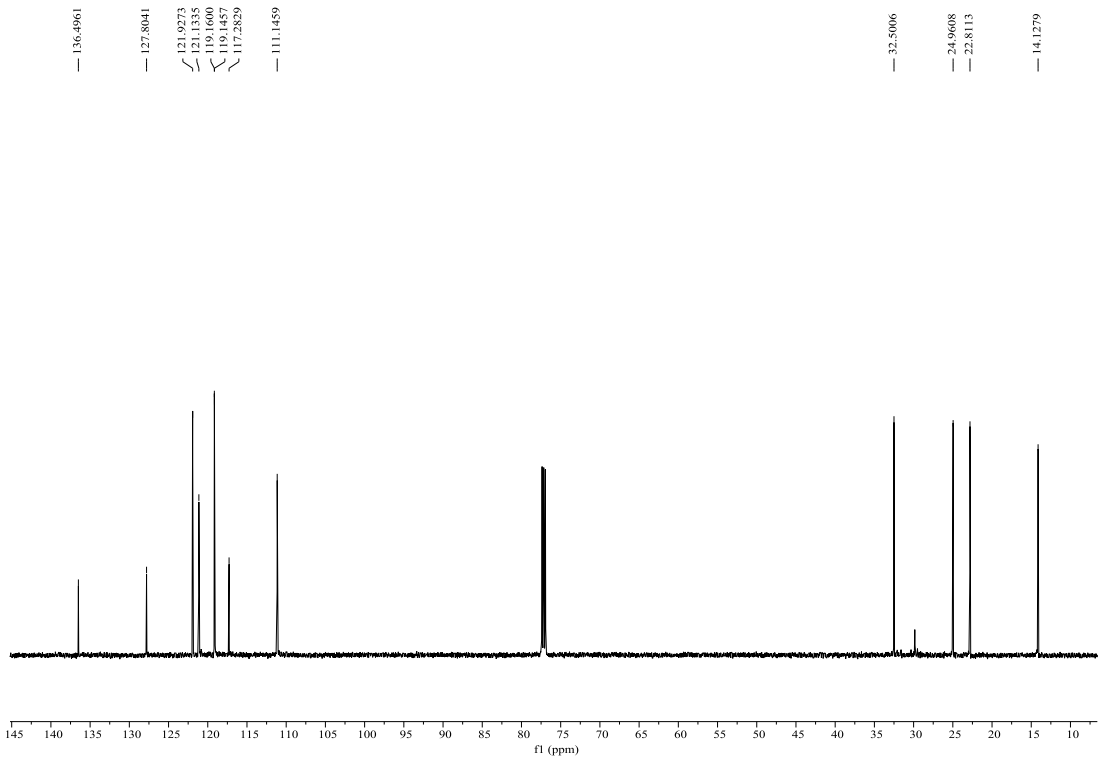

### 3-octyl-1H-indole (4c)

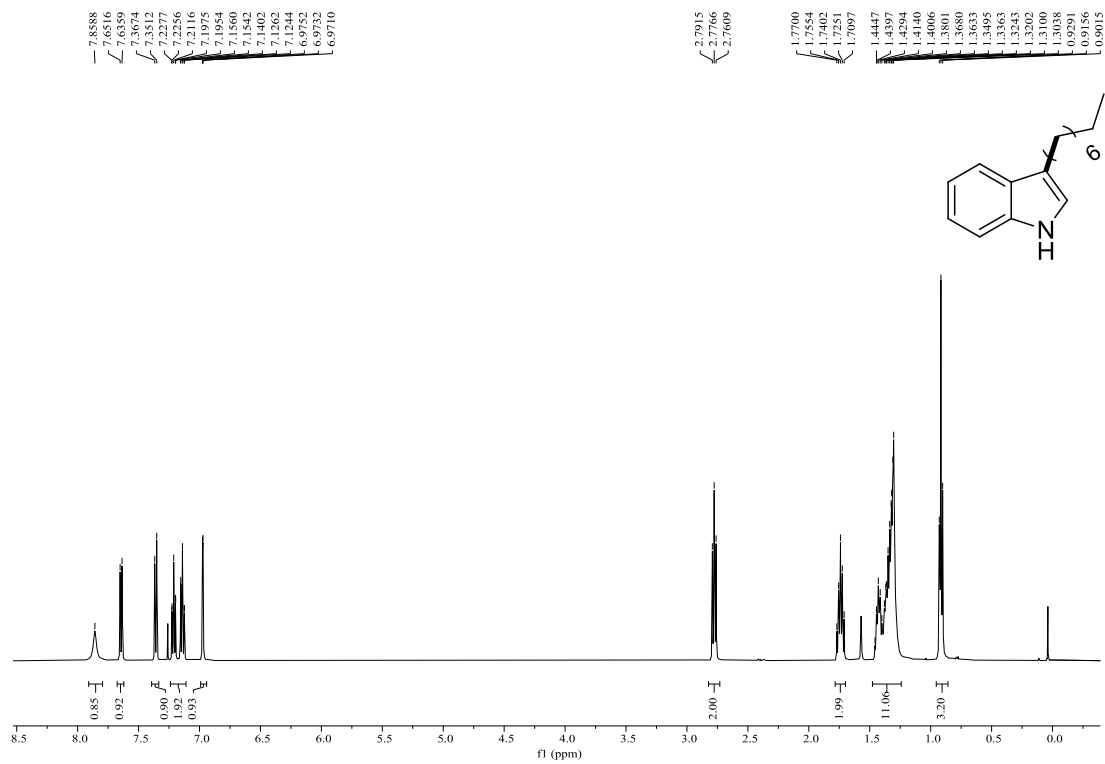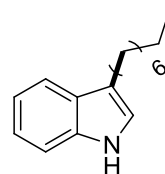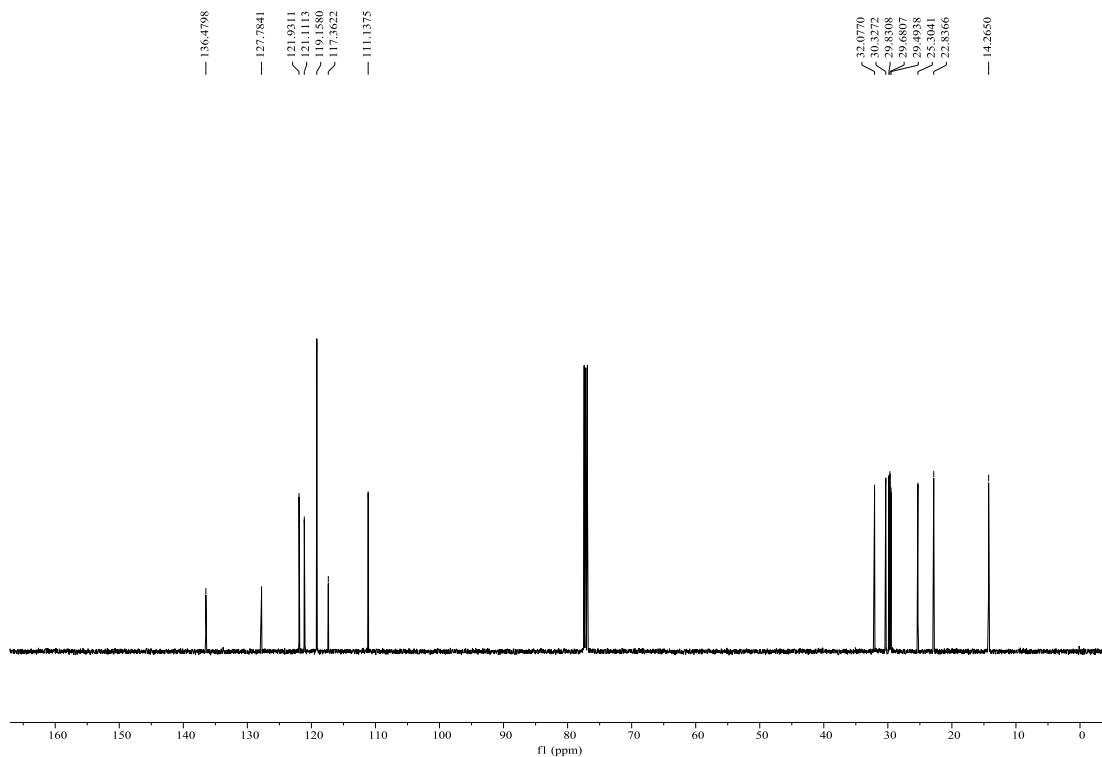

### 3-dodecyl-1H-indole (4d)

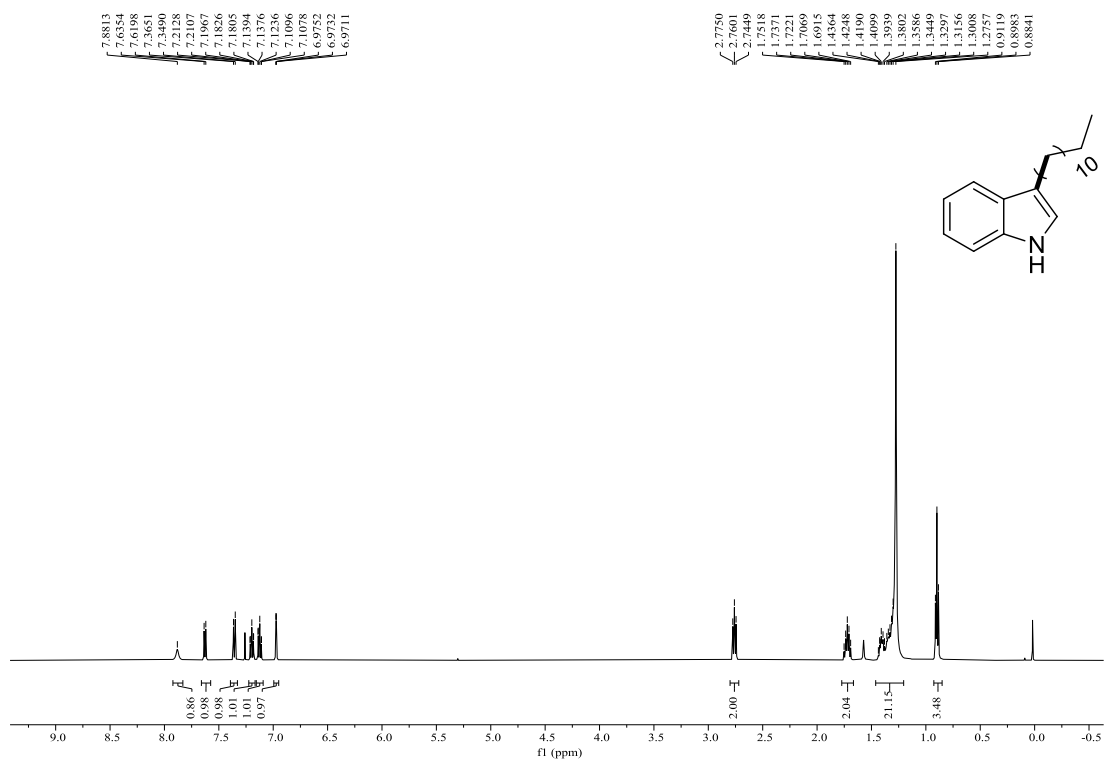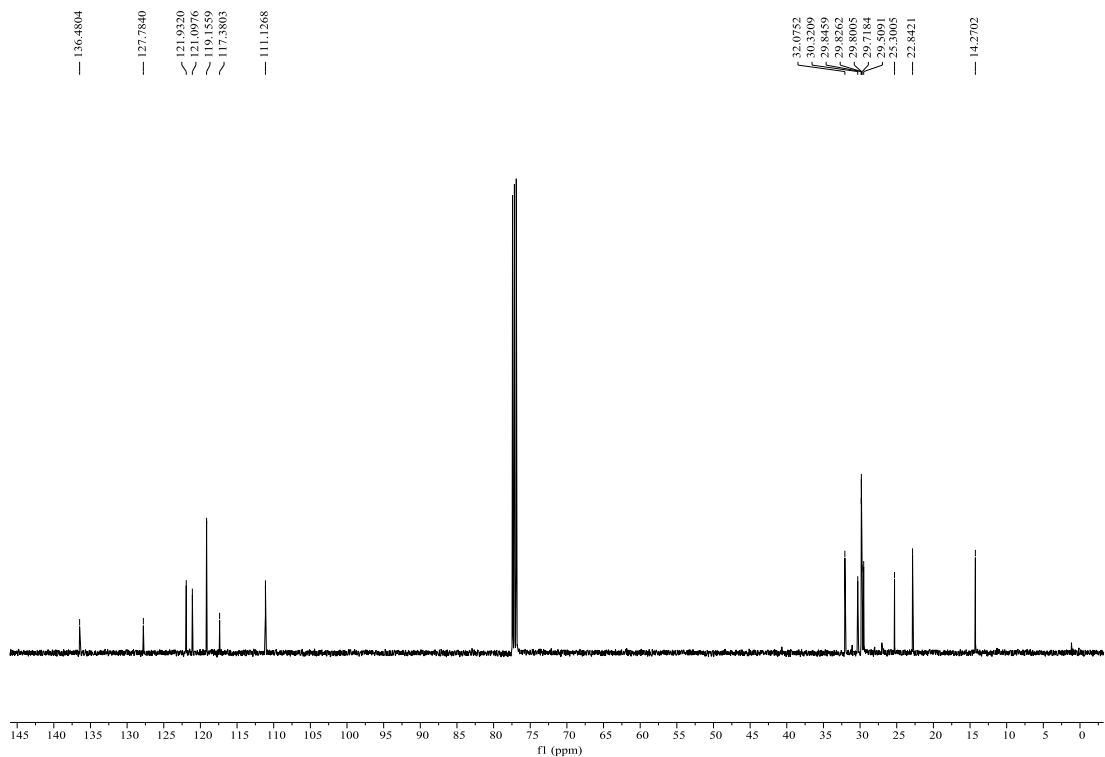

### 3-phenylbutyl-1H-indole (4e)

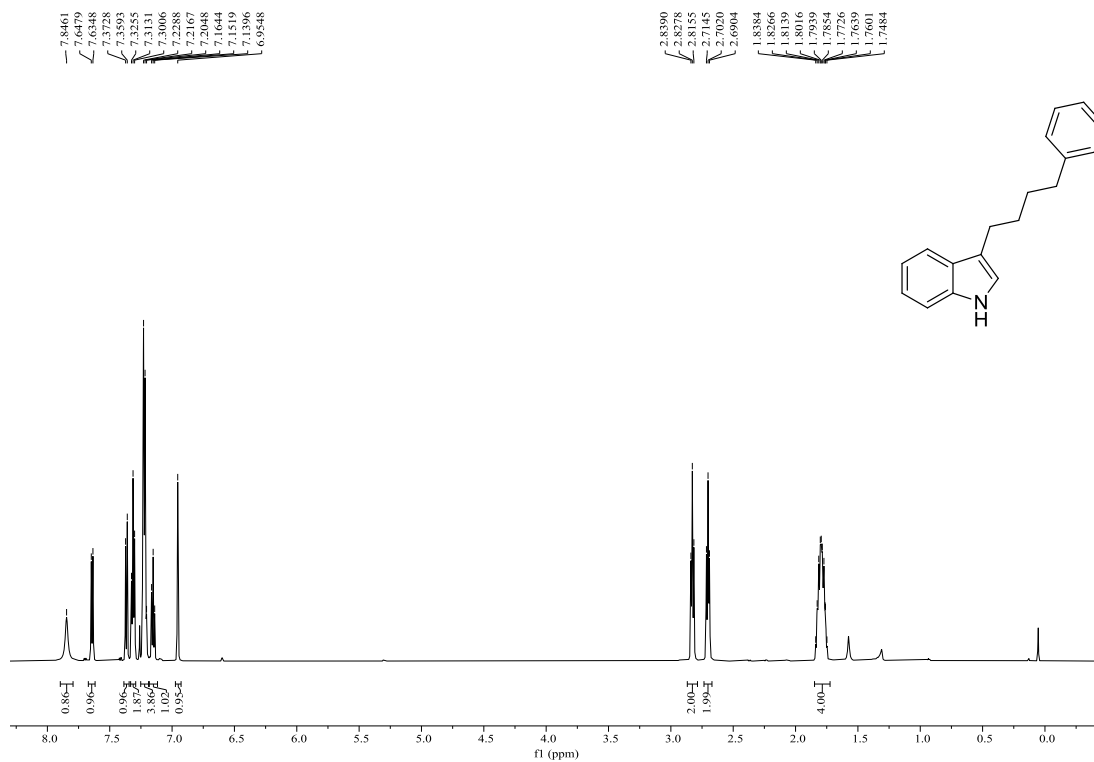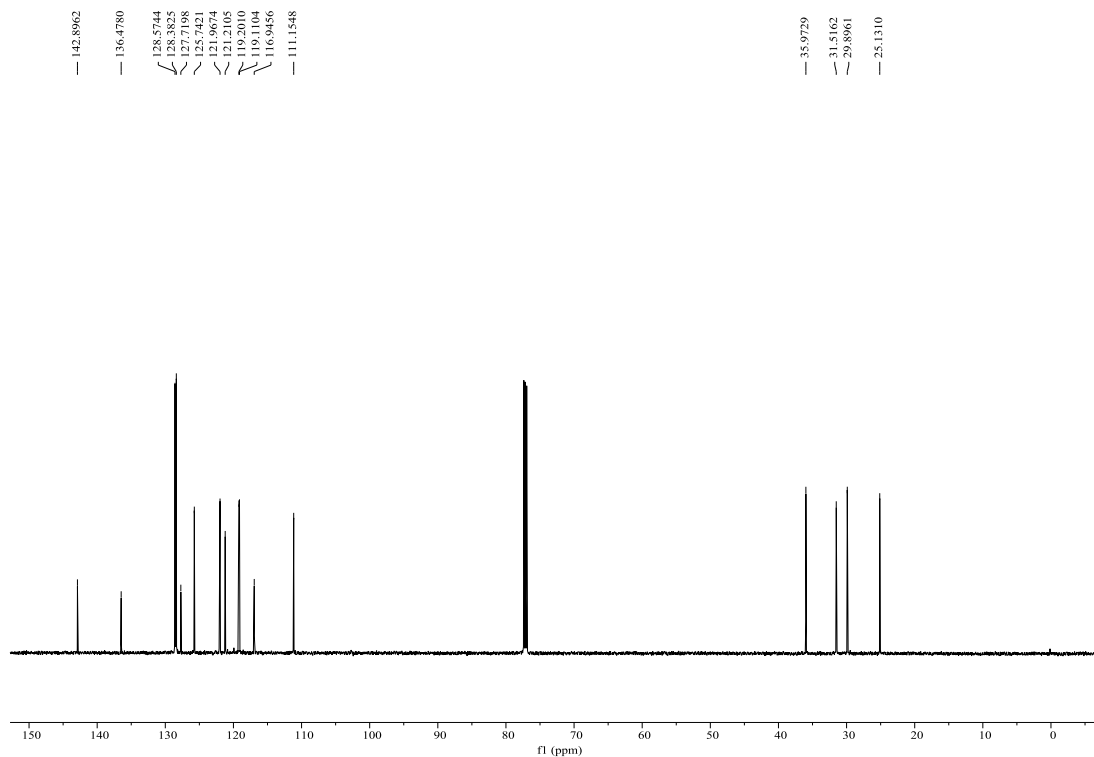

### 3-(cyclohexylmethyl)-1H-indole (4f)

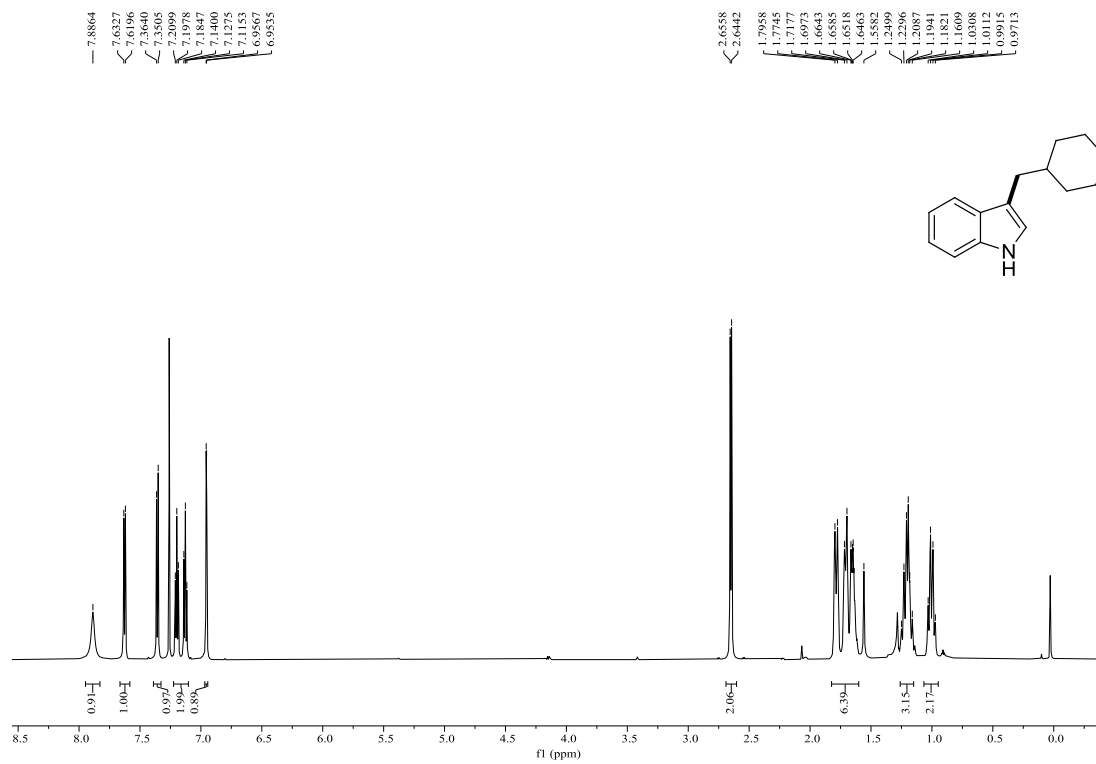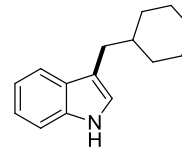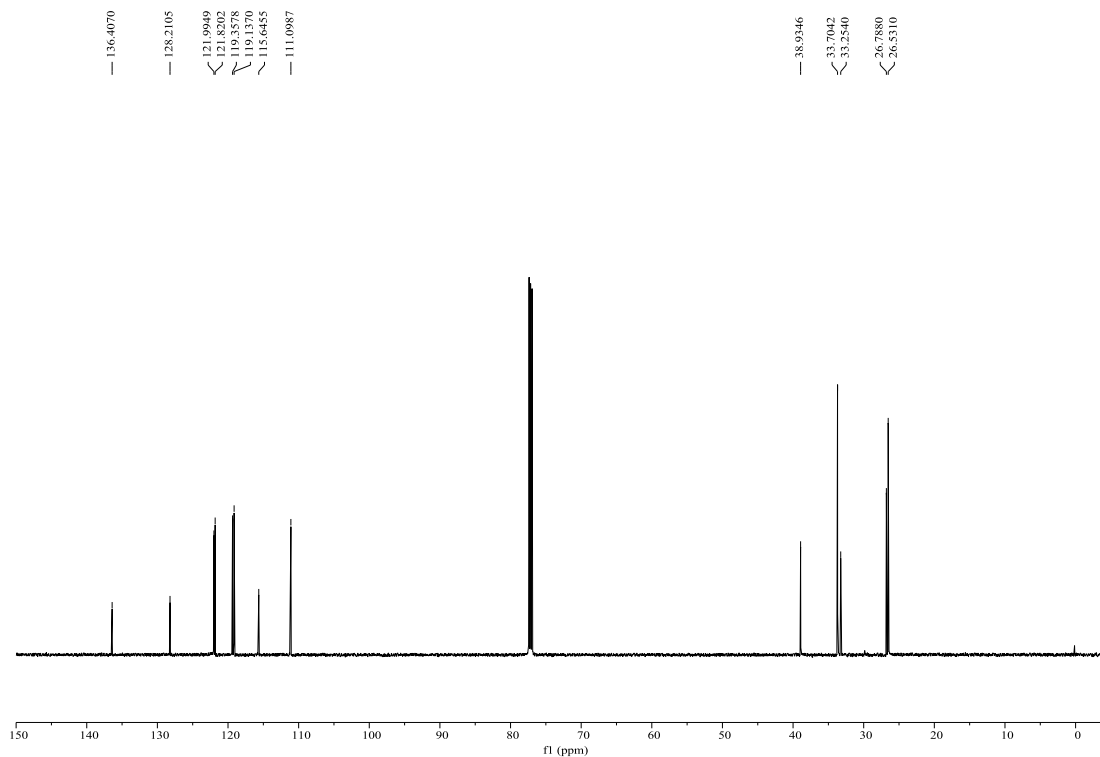



### 3-cyclohexyl-1H-indole (4g)

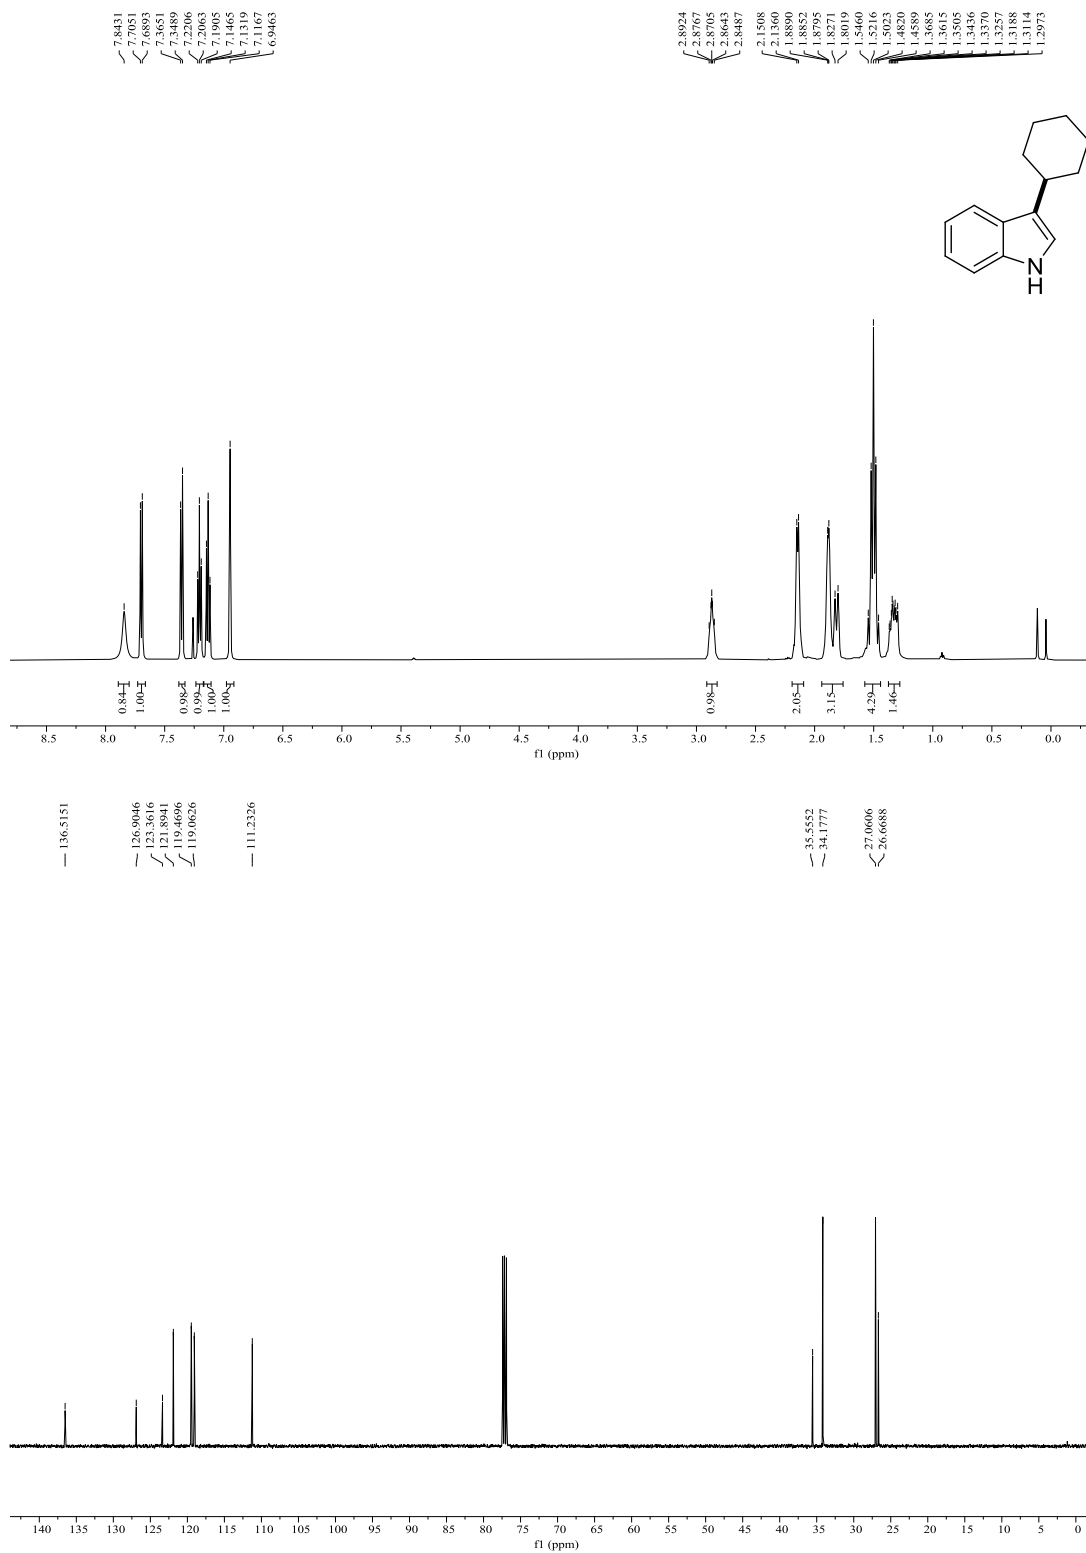

### 3-isopropyl-1H-indole (4h)

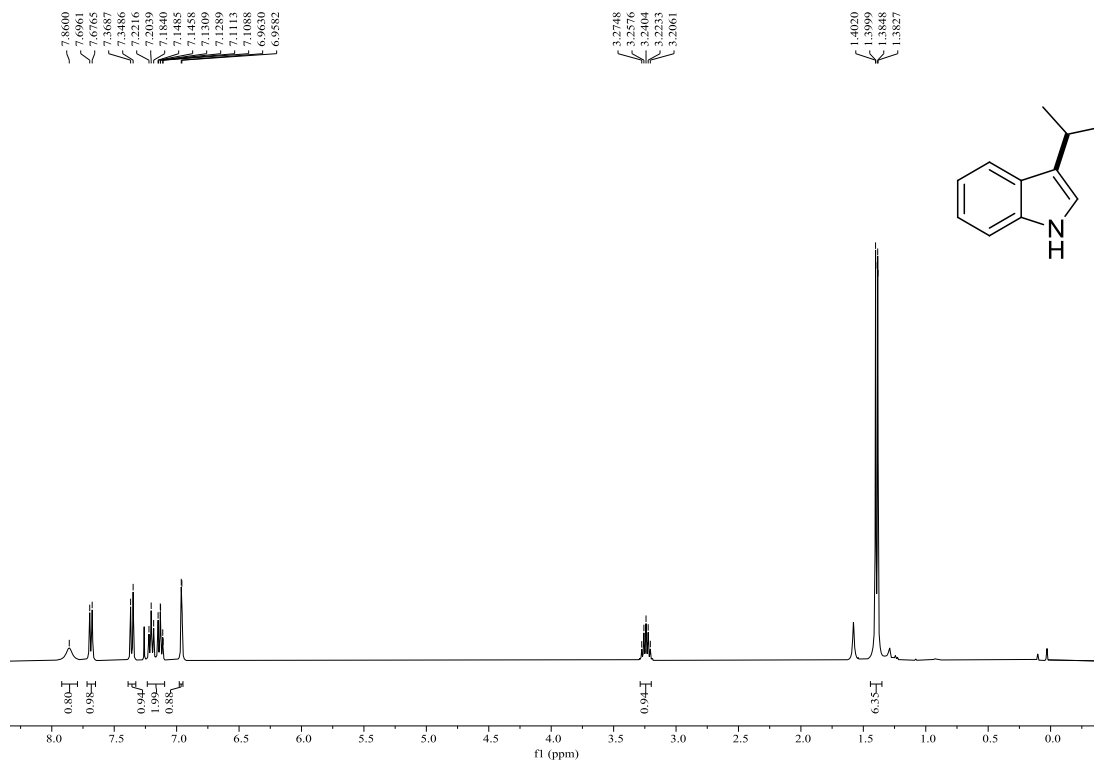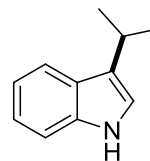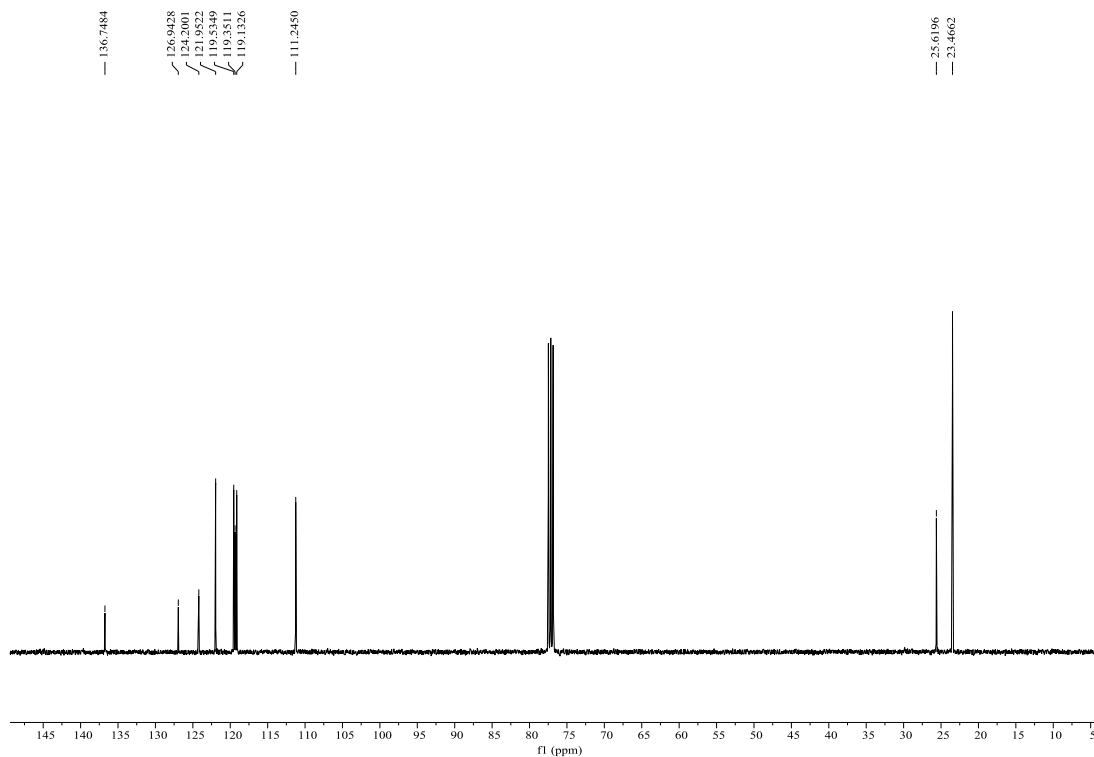

### 3-(1-methylheptyl)-1H-indole (4i)

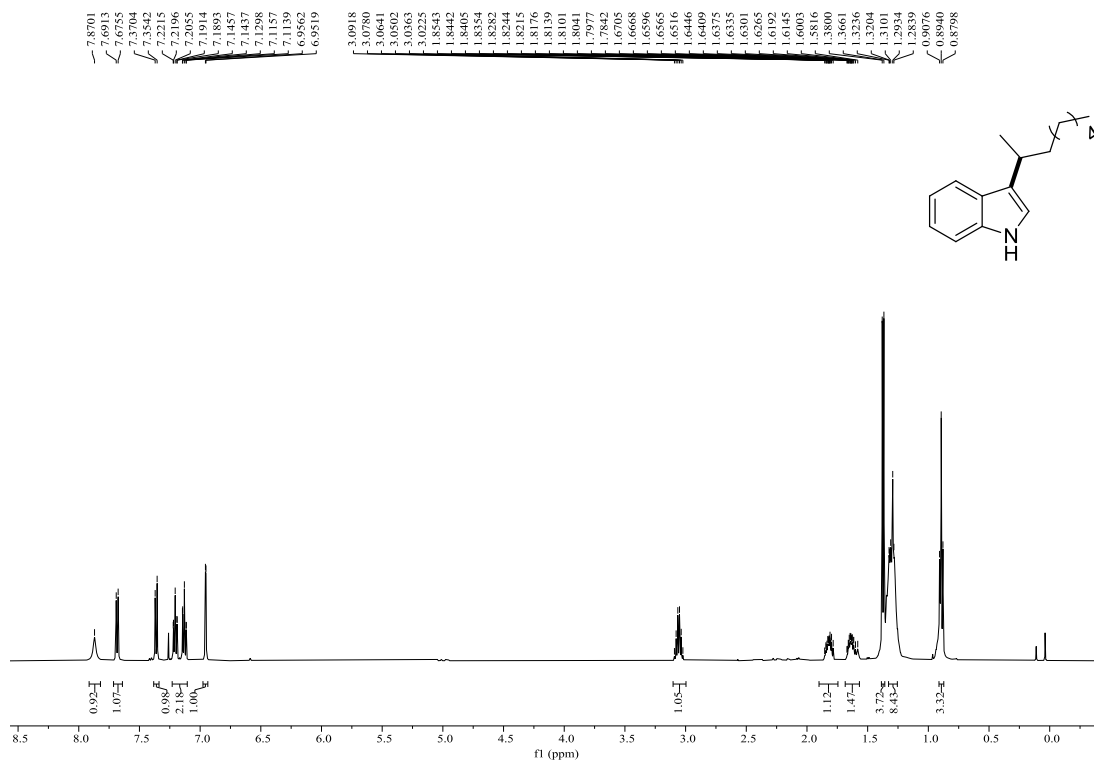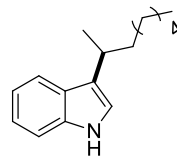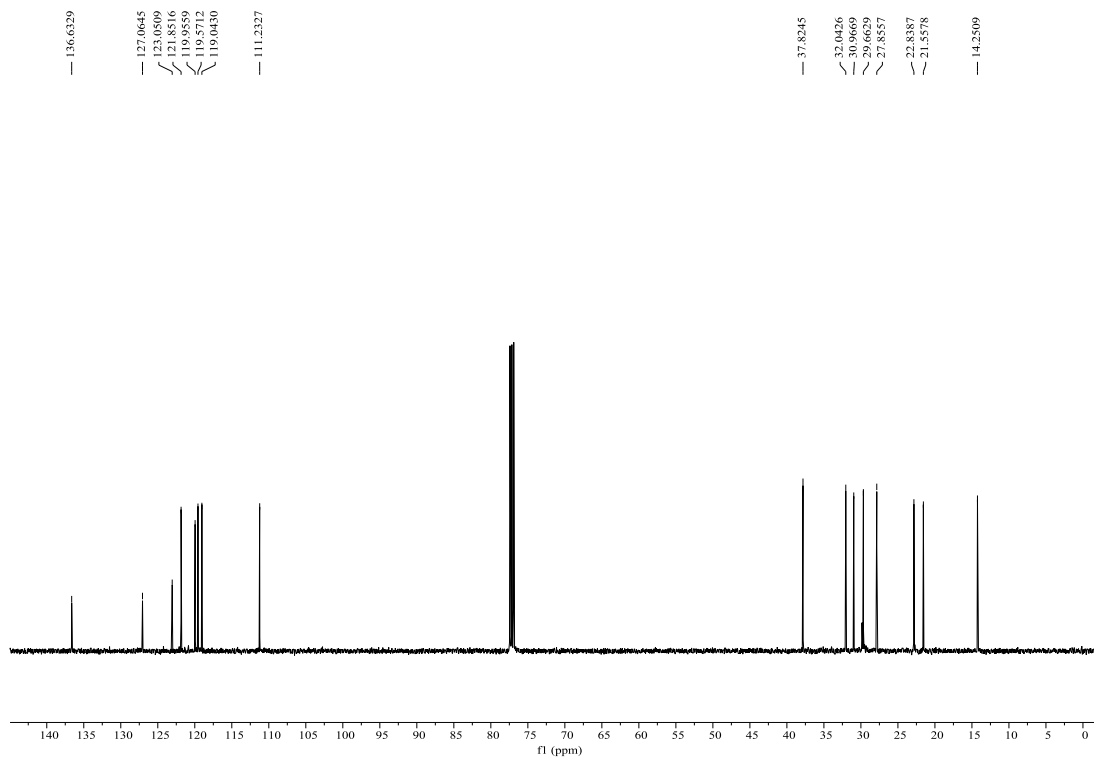

### 3-(undec-10-en-1-yl)-1H-indole (4j)

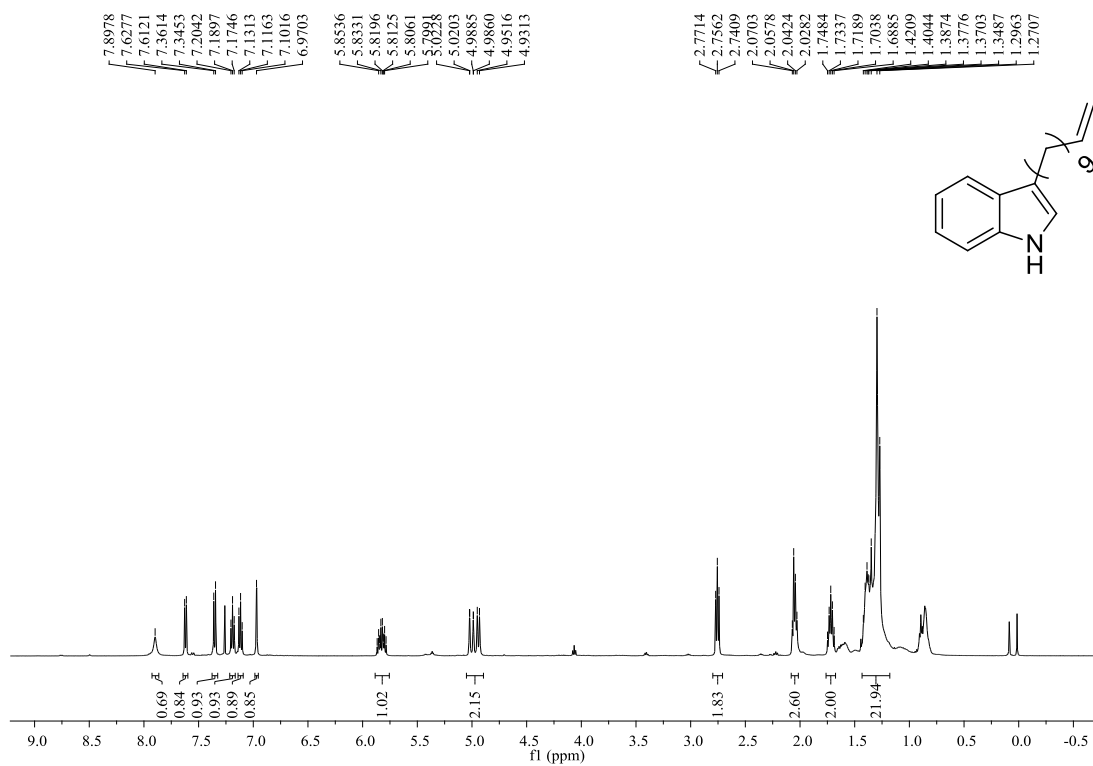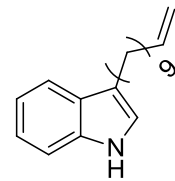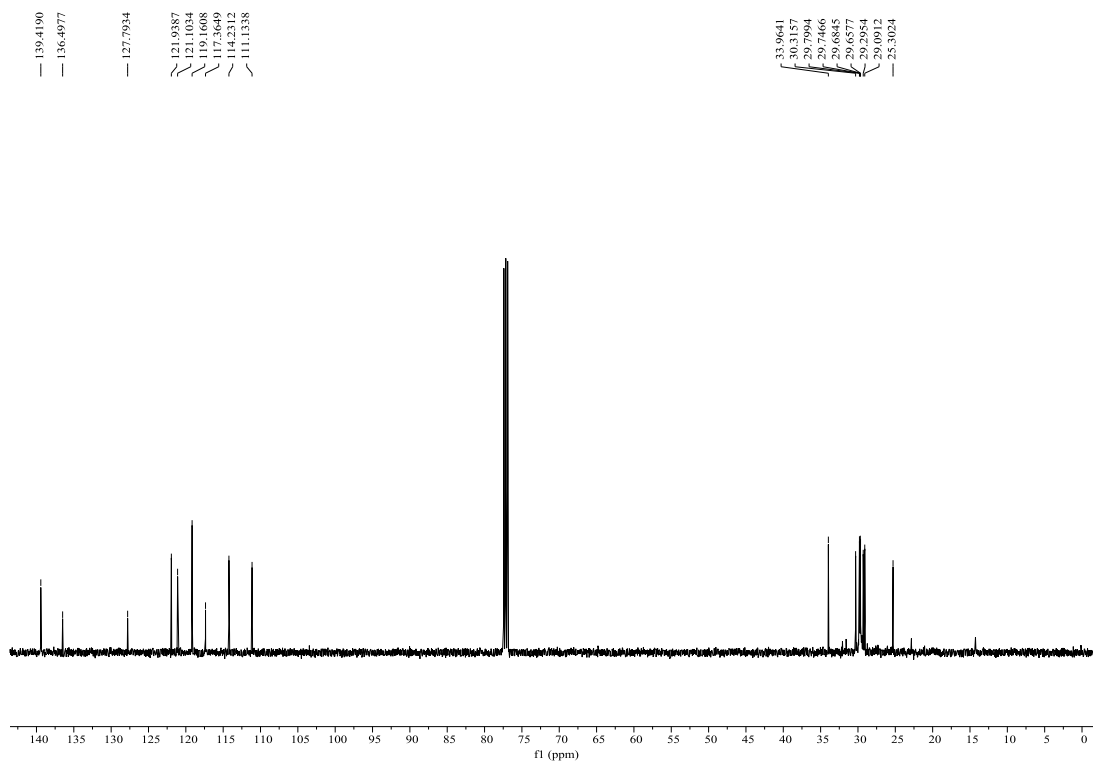

### 3-benzyl-4-methyl-1H-indole (5a)

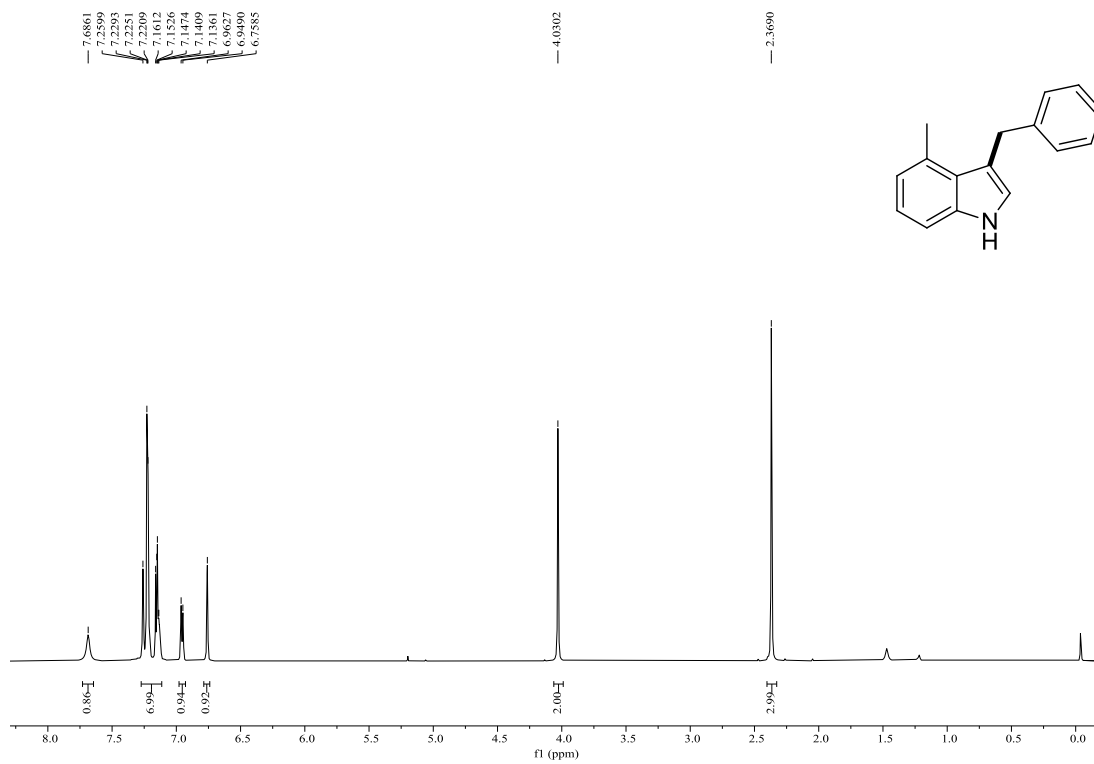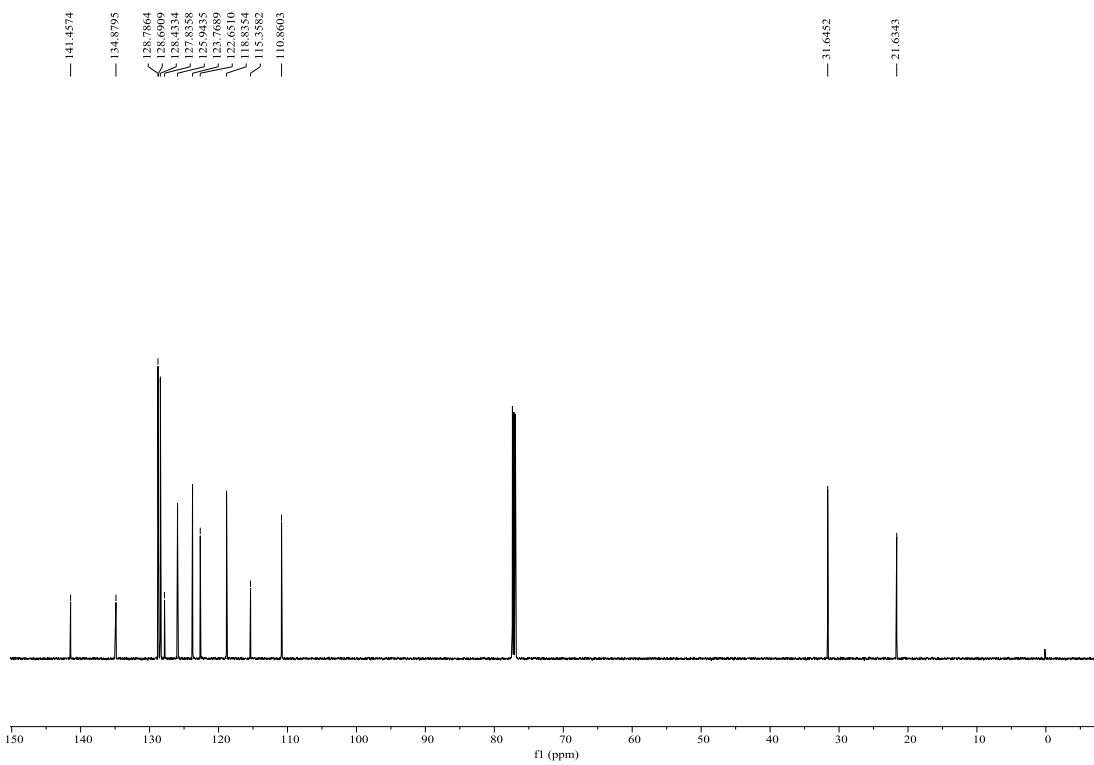

### 3-benzyl-5-methyl-1H-indole (5b)

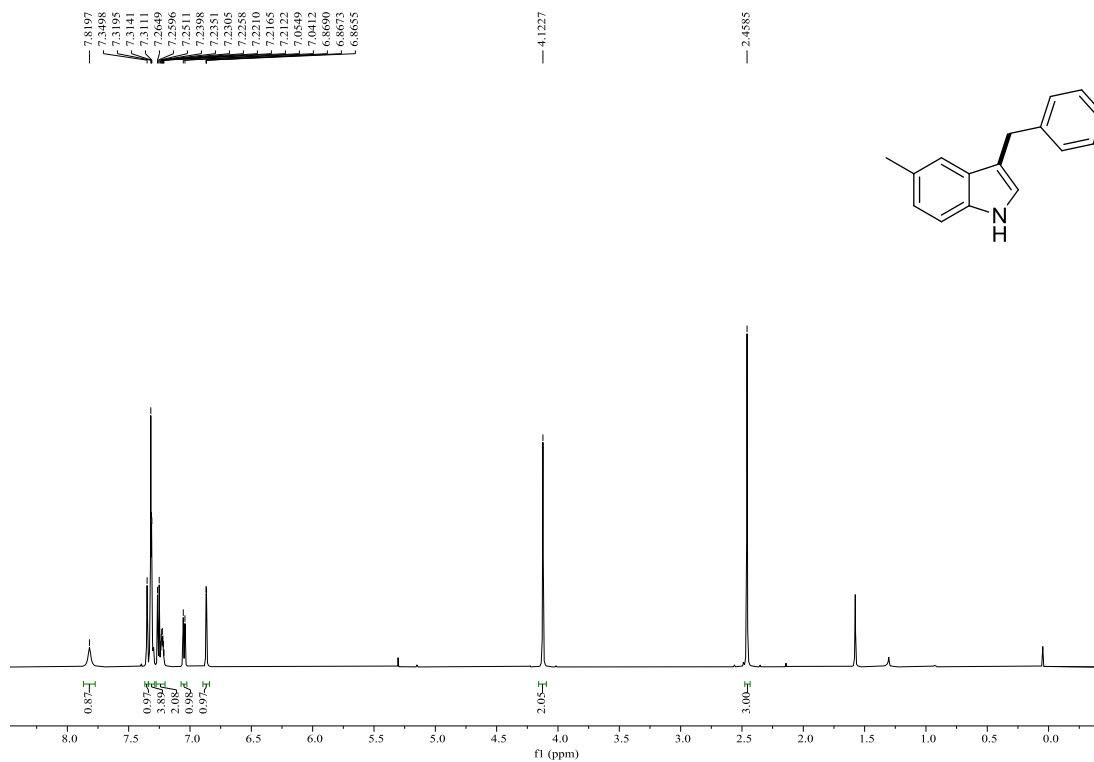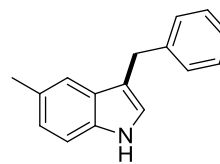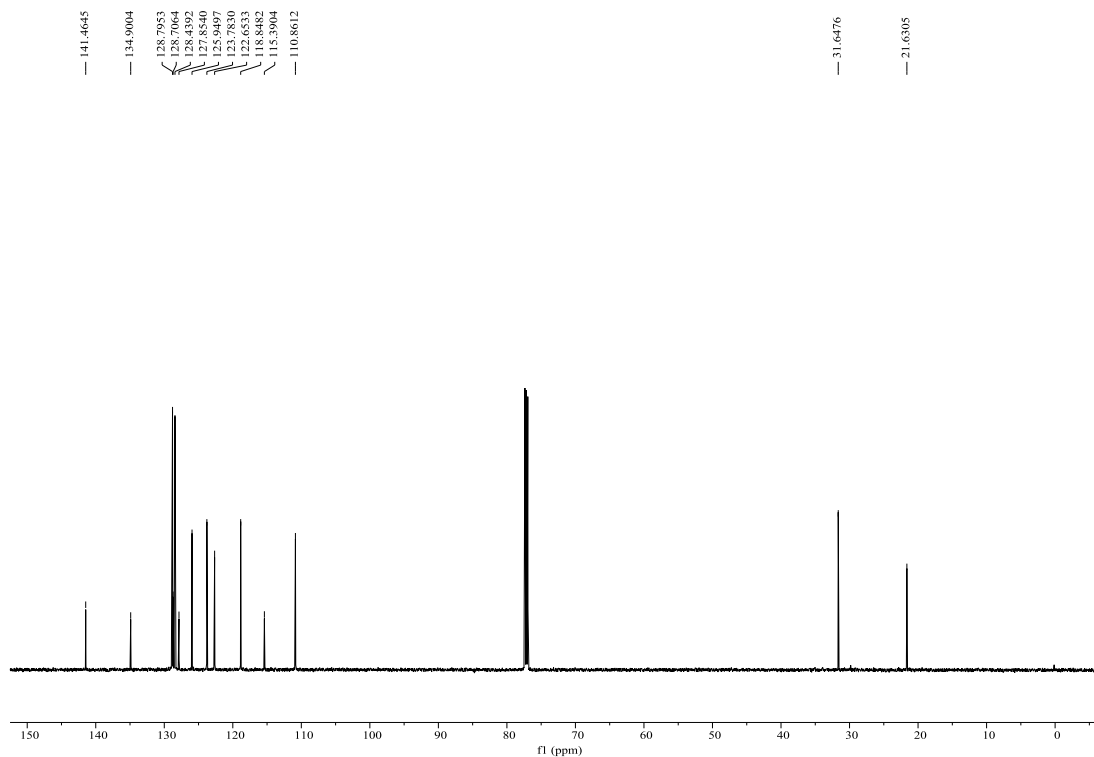

### 3-benzyl-6-methyl-1H-indole (5c)

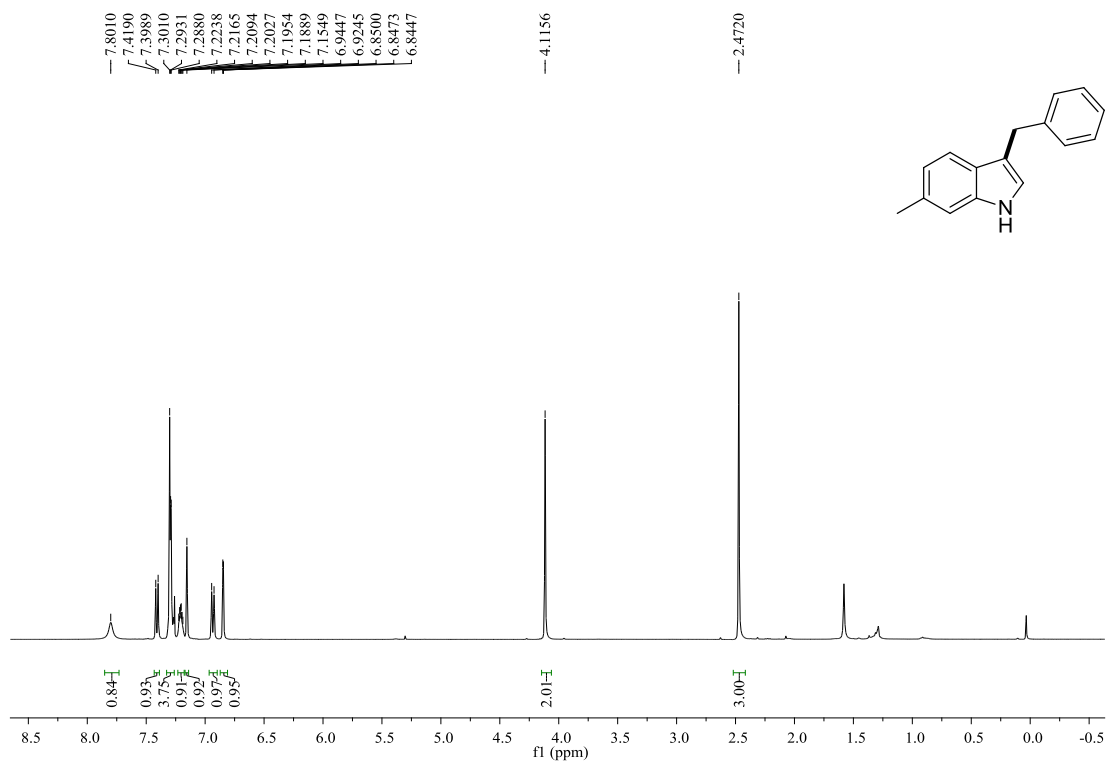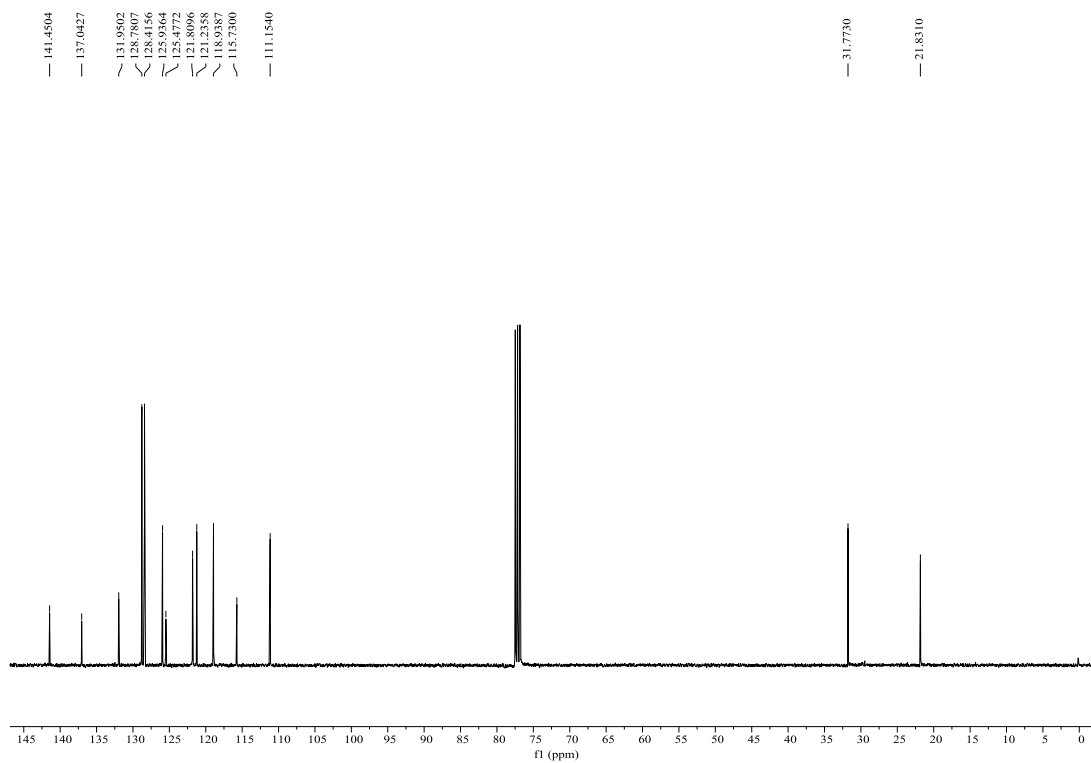

### 3-benzyl-7-methyl-1H-indole (5d)

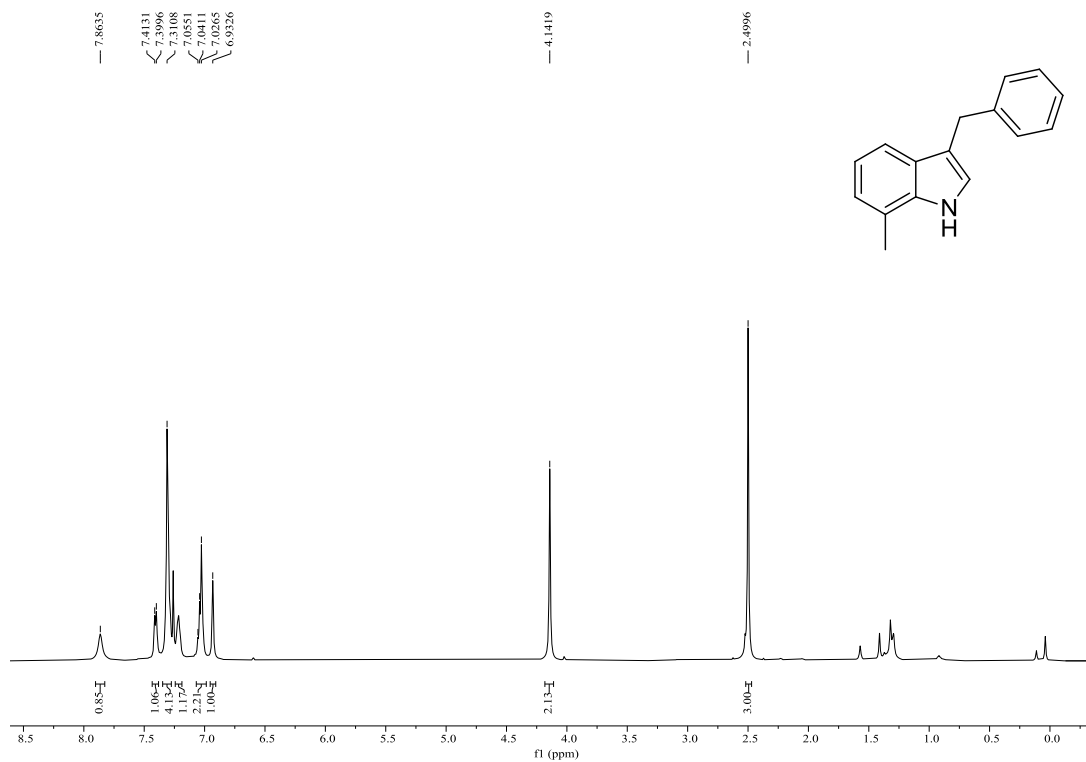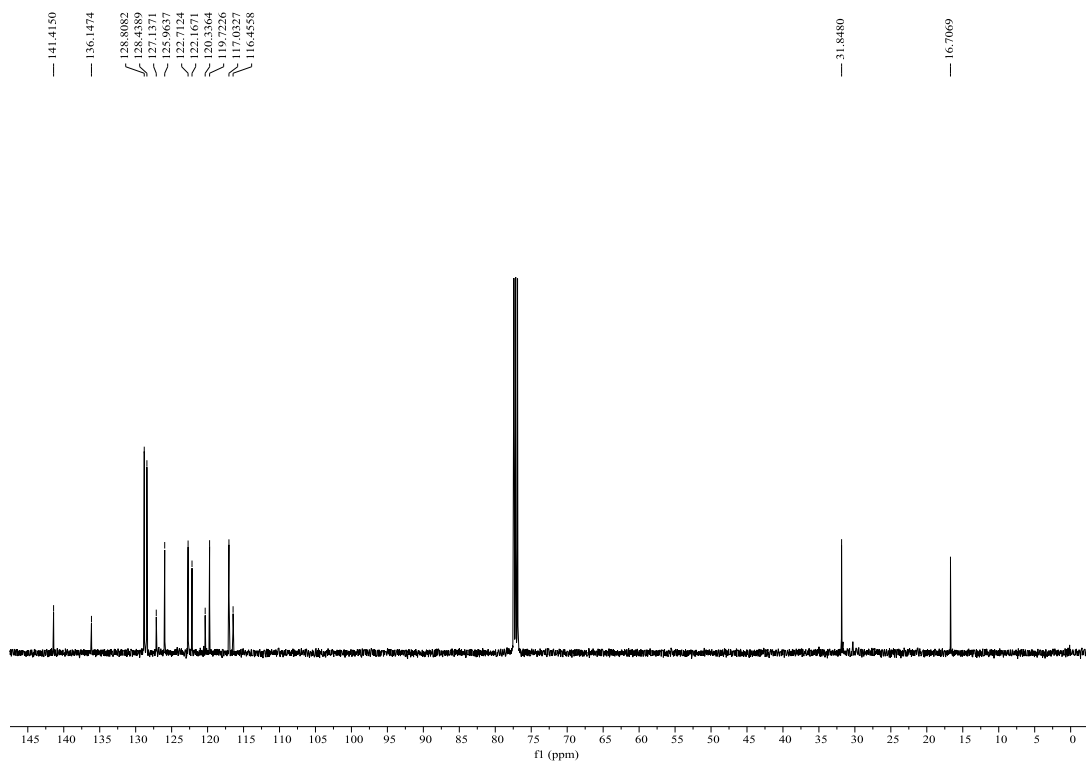



### 3-benzyl-5-methoxy-1H-indole (5e)

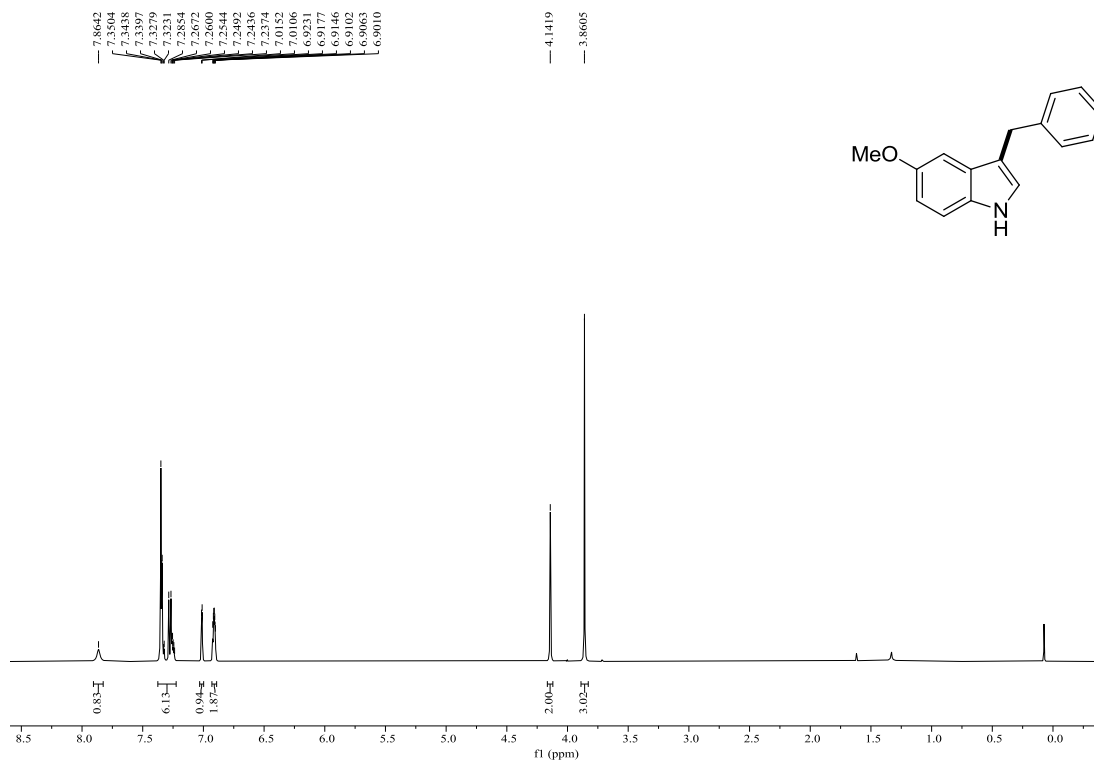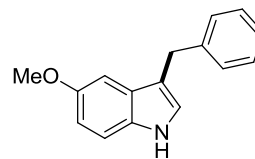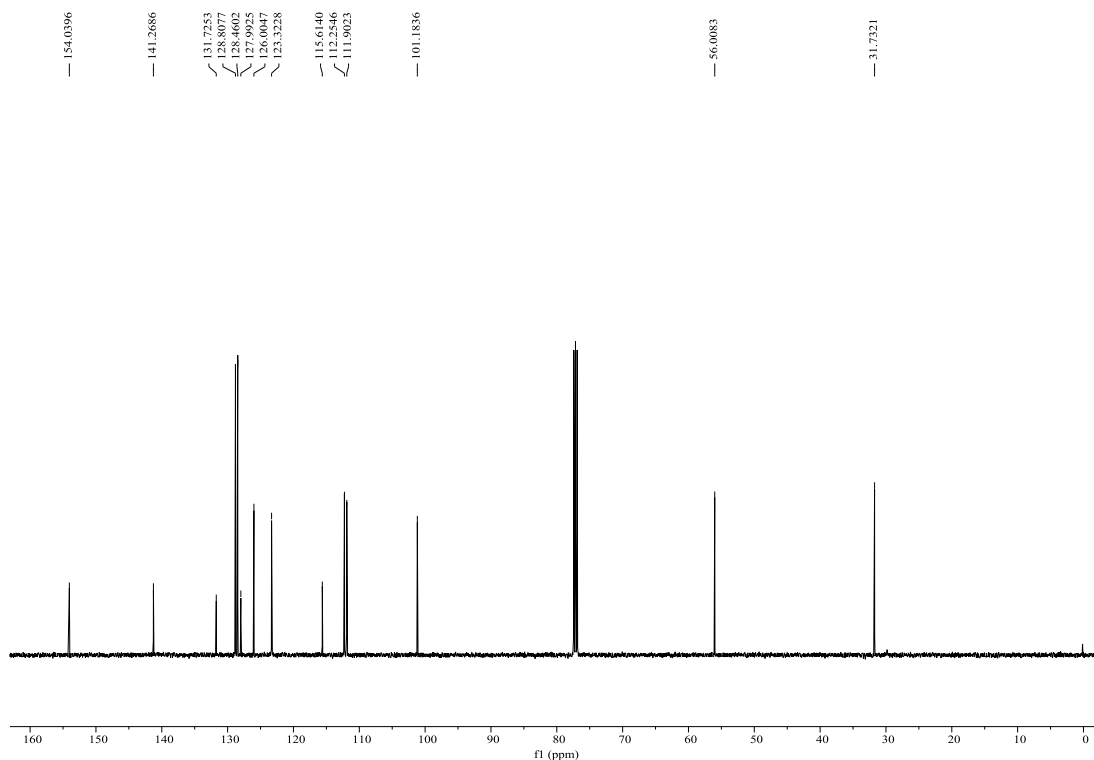

### 3-benzyl-6-methoxy-1H-indole (5f)

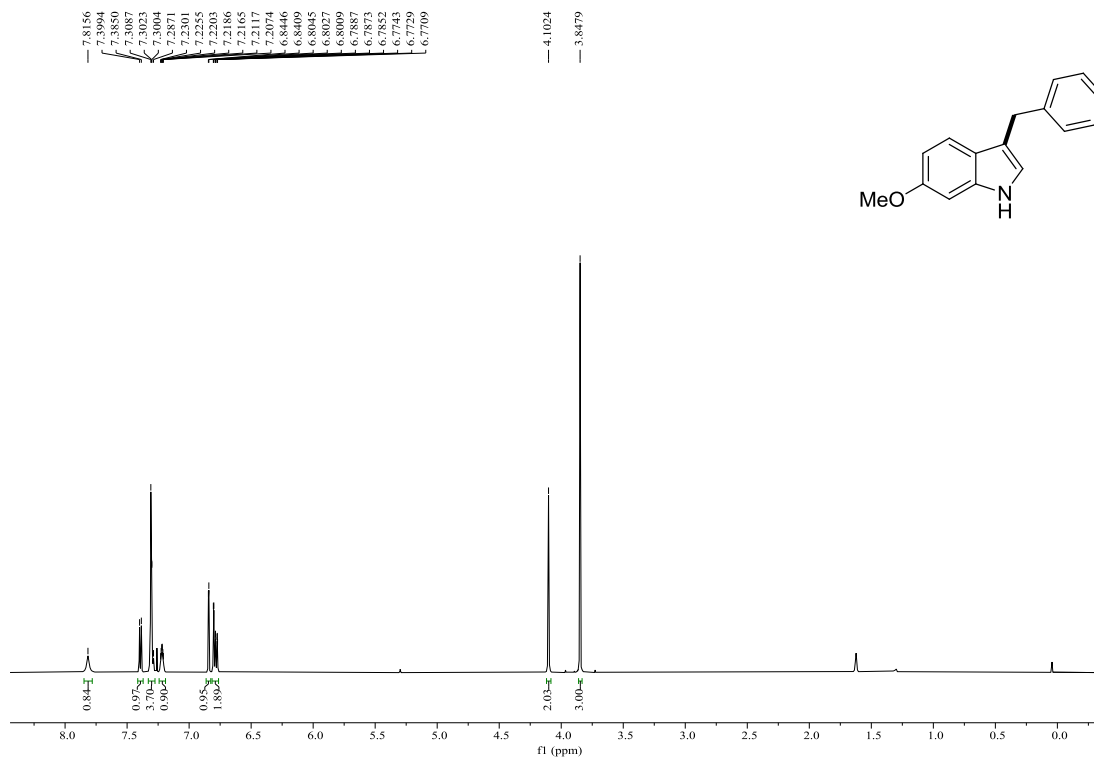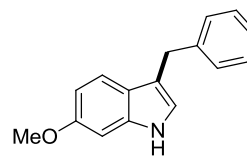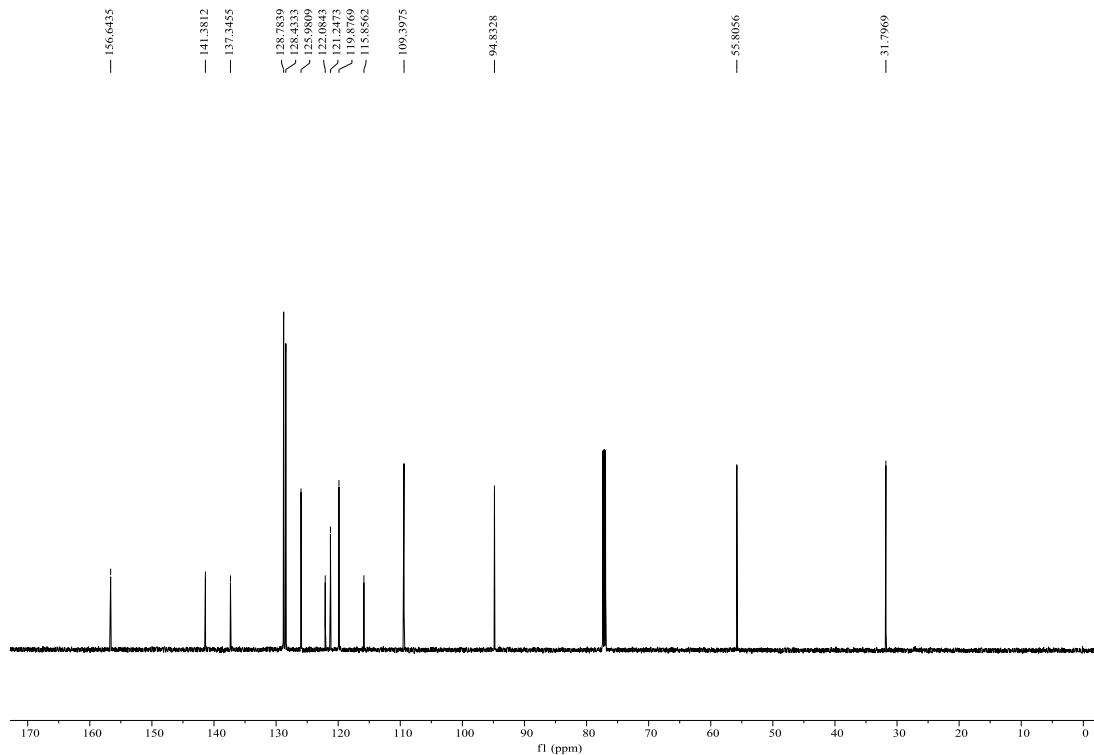

### 3-benzyl-5-fluoro-1H-indole (5g)

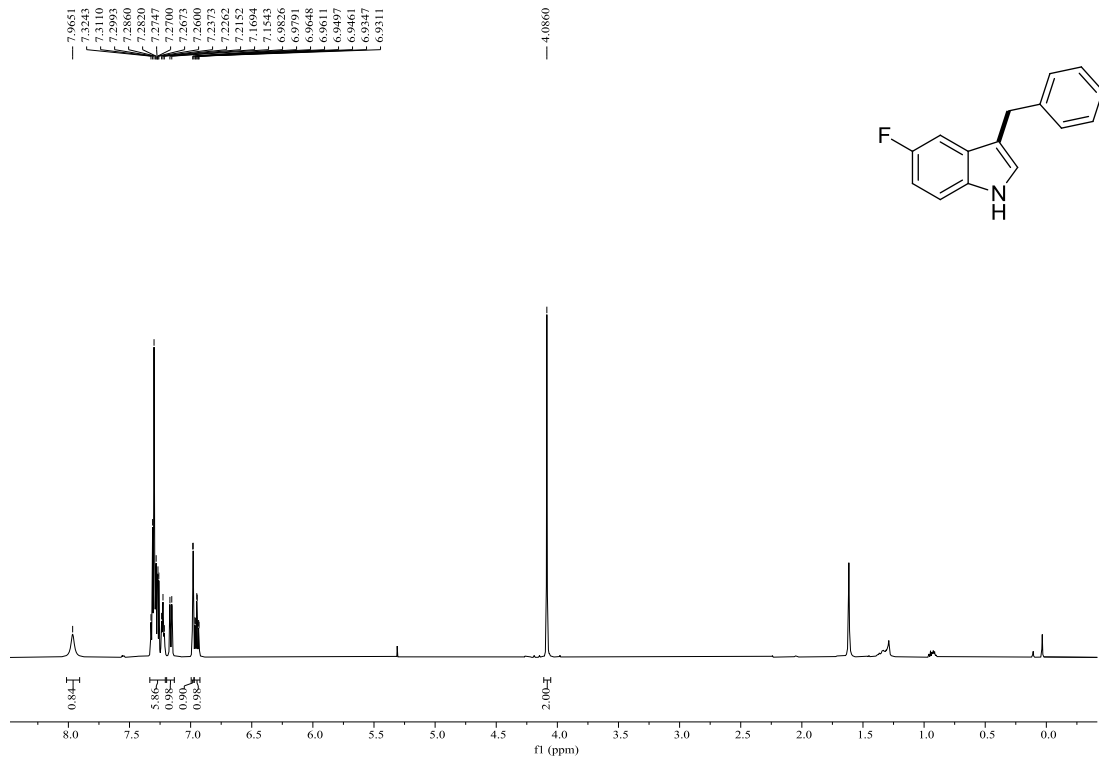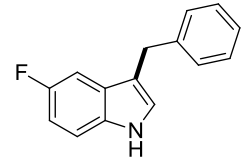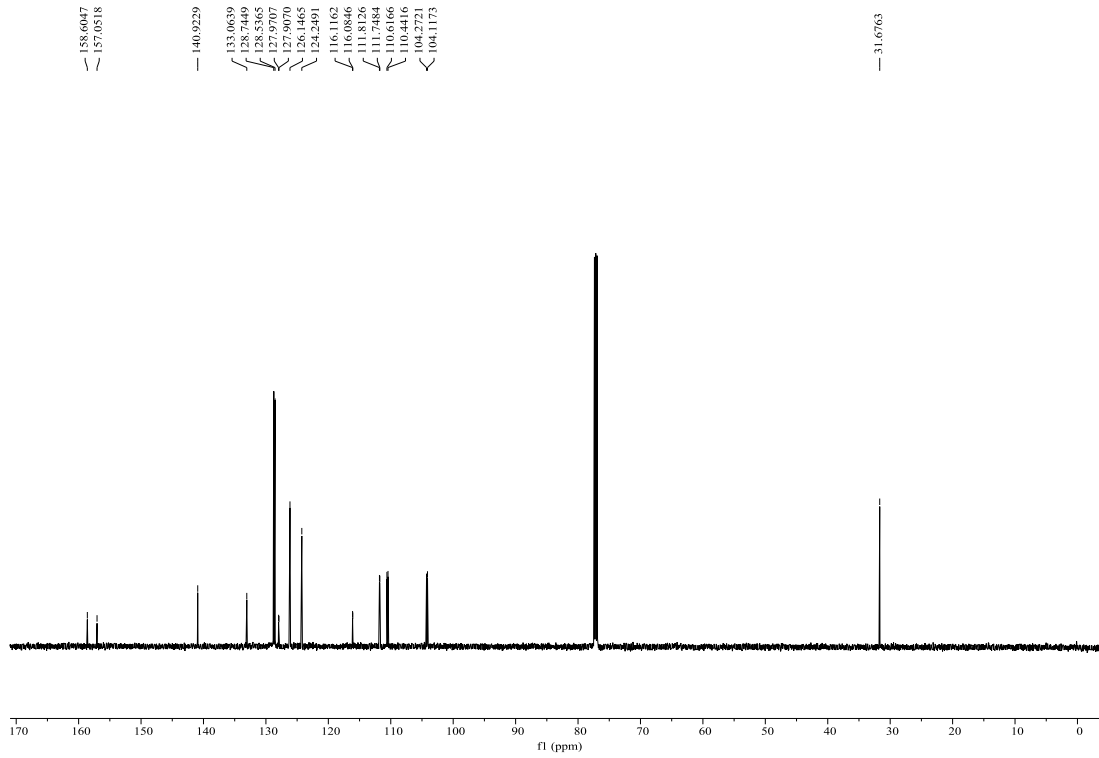

### 3-benzyl-6-fluoro-1H-indole (5h)

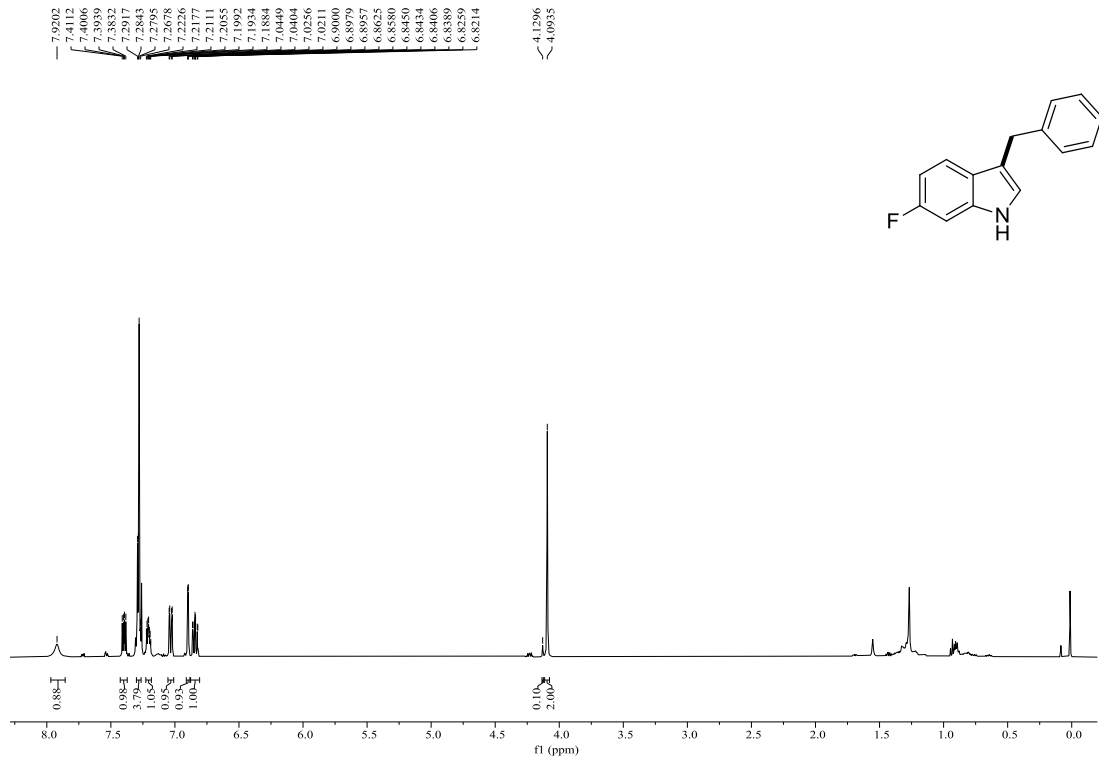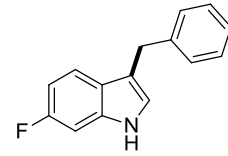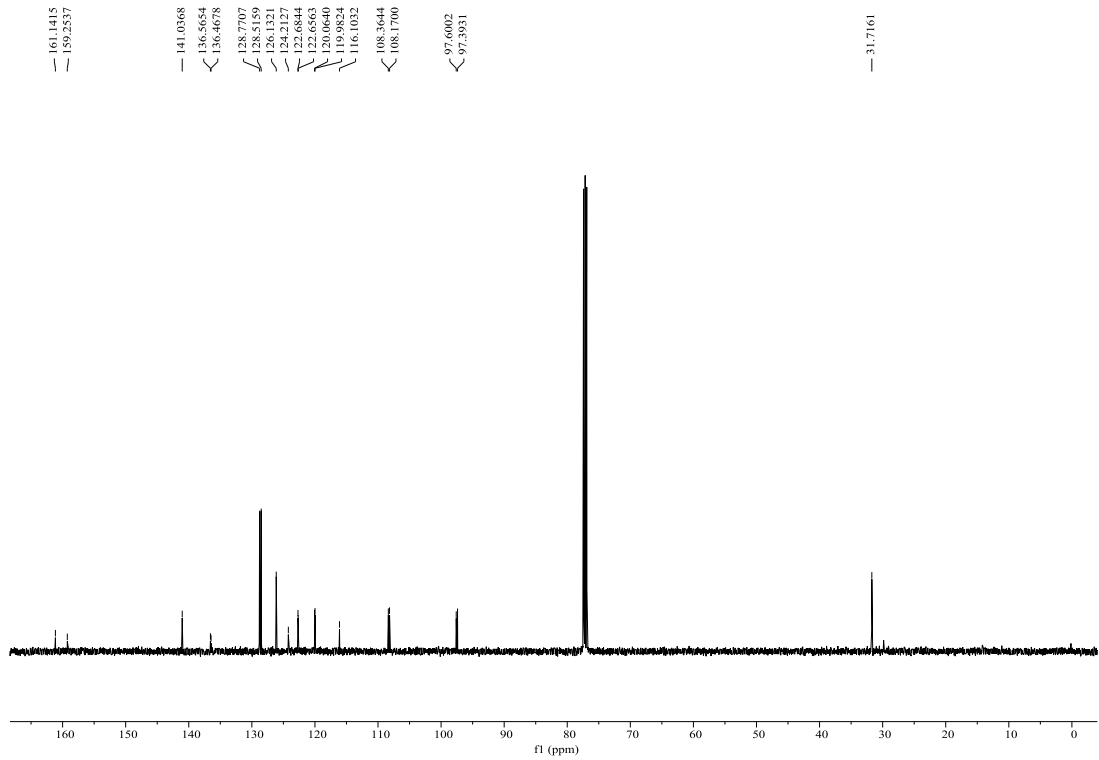

### 3-benzyl-2-methyl-1H-indole (5i)

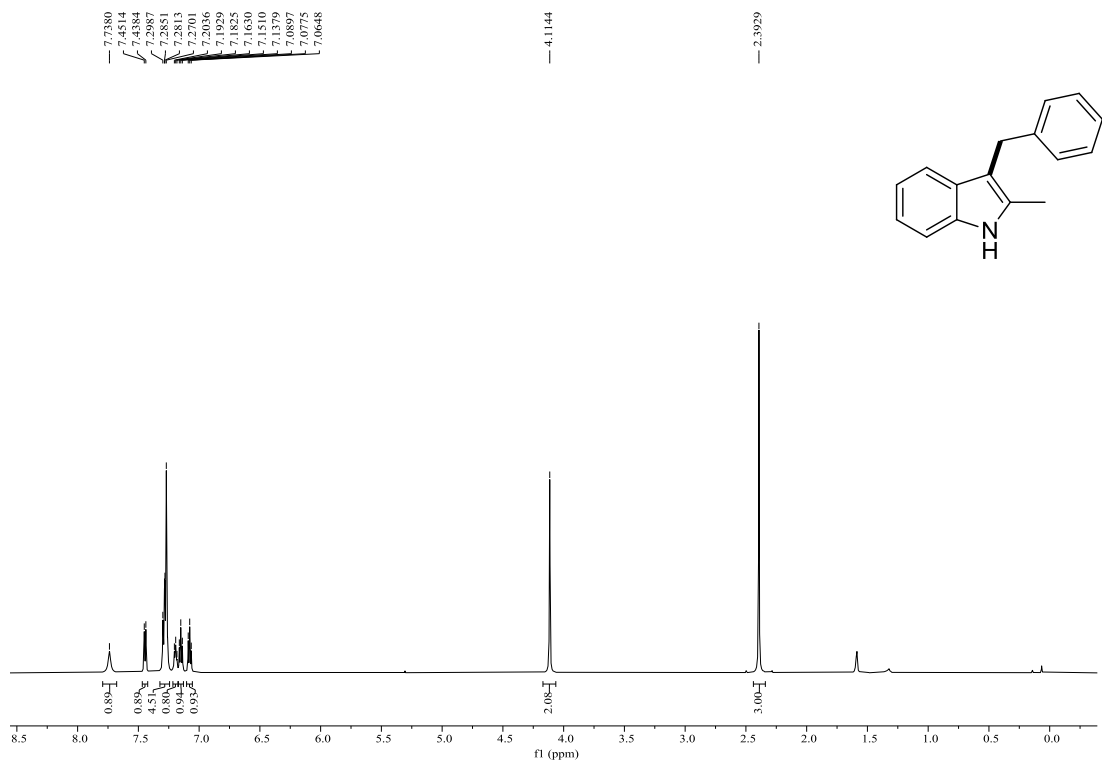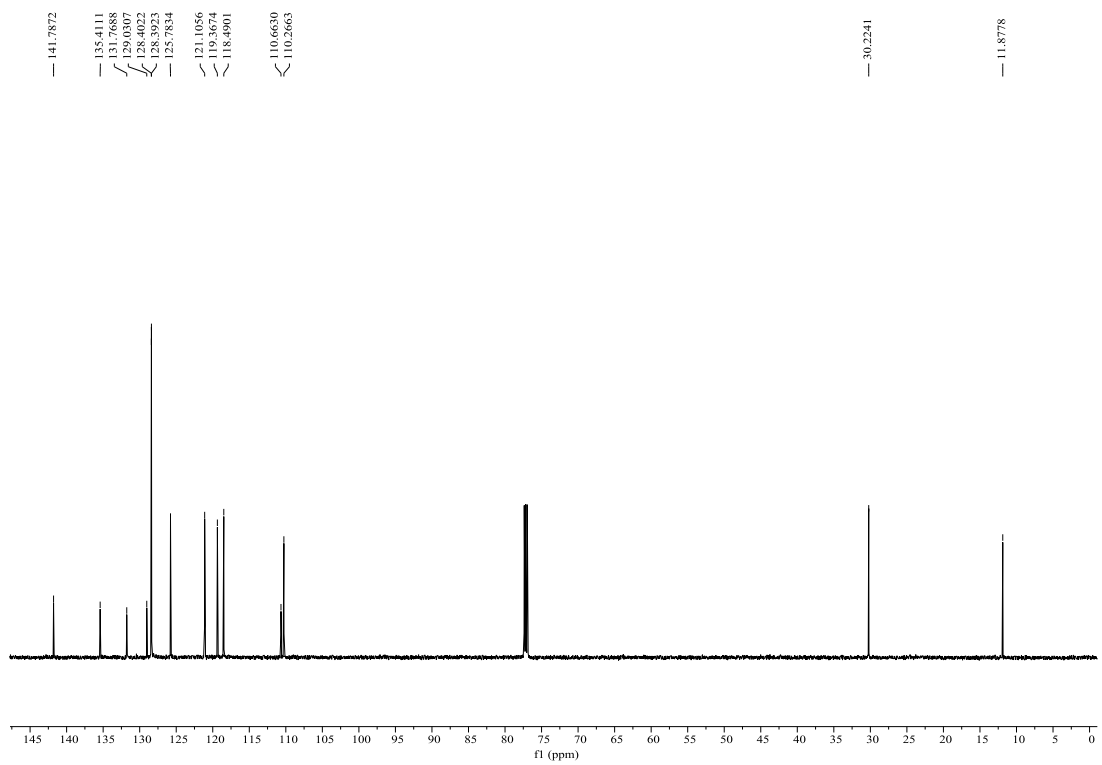

### 3-benzyl-2-phenyl-1H-indole (5j)

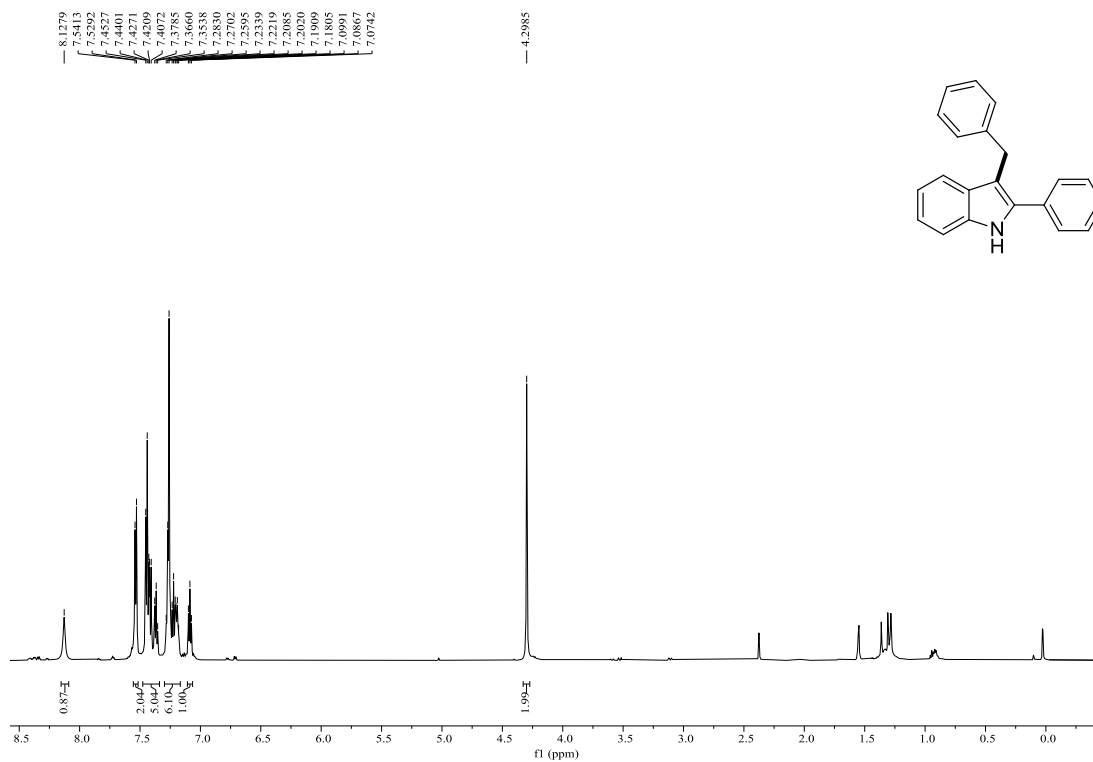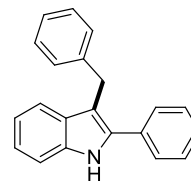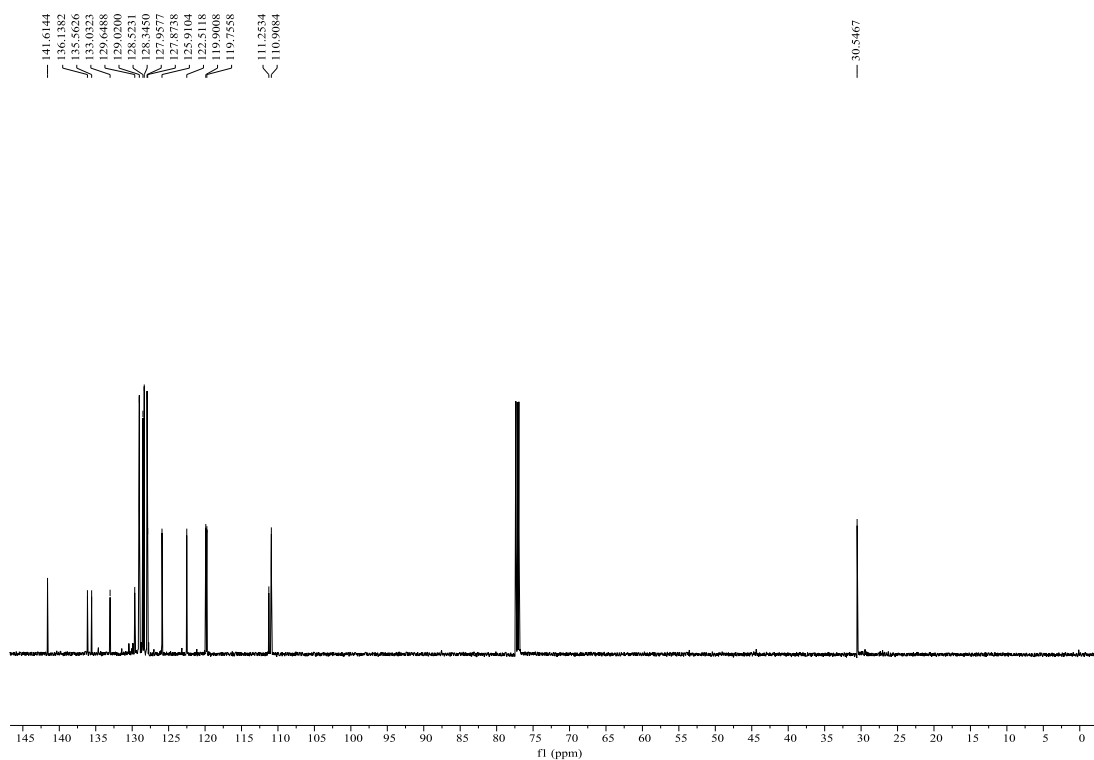

## 7. References

- [1] Putra, A. E.; Takigawa, K.; Tanaka, H.; Ito, Y.; Oe, Y.; Ohta, T. Transition-Metal-Catalyzed Regioselective Alkylation of Indoles with Alcohols. *Eur. J. Org. Chem.*, **2013**, 2013, 6344-6354.
- [2] Kona, C. N.; Shinde, M. H.; Ramana, C. V. Gold(I)-catalyzed hydroindolylolation of allenyl ethers. *Org. Biomol. Chem.*, **2015**, 13, 5358-5362.
- [3] Katritzky, A. R.; Lan, X.; Lam, J. N. Benzotriazole as a synthetic auxiliary: advantageous syntheses of substituted diarylmethanes and heterocyclic analogs. *J. Org. Chem.*, **1991**, 56, 4397-4403.
- [4] Di Gregorio, G.; Mari, M.; Bartocchini, F.; Piersanti, G. Iron-Catalyzed Direct C3-Benzoylation of Indoles with Benzyl Alcohols through Borrowing Hydrogen. *J. Org. Chem.*, **2017**, 82, 8769-8775.
- [5] Seck, C.; Mbaye, M. D.; Gaillard, S.; Renaud, J.-L. Bifunctional Iron Complexes Catalyzed Alkylation of Indoles. *Adv. Synth. Catal.*, **2018**, 360, 4640-4645.
- [6] Nokami, T.; Yamane, Y.; Oshitani, S.; Kobayashi, J. K.; Matsui, S.; Nishihara, T.; Uno, H.; Hayase, S.; Itoh, T. The beta-Silyl Effect on the Memory of Chirality in Friedel-Crafts Alkylation Using Chiral alpha-Aryl Alcohols. *Org. Lett.*, **2015**, 17, 3182-3185.
- [7] Polidano, K.; Allen, B. D. W.; Williams, J. M. J.; Morrill, L. C. Iron-Catalyzed Methylation Using the Borrowing Hydrogen Approach. *ACS Catal.*, **2018**, 8, 6440-6445.
- [8] Imm, S.; Bahn, S.; Tillack, A.; Mevius, K.; Neubert, L.; Beller, M. Selective ruthenium-catalyzed alkylation of indoles by using amines. *Chem. Eur. J.*, **2010**, 16, 2705-2709.
- [9] Zhang, Y.; Stephens, D.; Hernandez, G.; Mendoza, R.; Larionov, O. V. Catalytic diastereo- and enantioselective annulations between transient nitrosoalkenes and indoles. *Chem. Eur. J.*, **2012**, 18, 16612-16615.
- [10] Borghs, J. C.; Zubar, V.; Azofra, L. M.; Sklyaruk, J.; Rueping, M. Manganese-Catalyzed Regioselective Dehydrogenative C- versus N-Alkylation Enabled by a Solvent Switch: Experiment and Computation. *Org. Lett.*, **2020**, 22, 4222-4227.
